1

1 **Title:**

2 The results of biodiversity-ecosystem functioning experiments are realistic

3

4 **Running headline:**

5 Realism of biodiversity experiments

6

7 **Authors:**

8 Jochum, Malte<sup>1,2,3</sup>, Fischer, Markus<sup>1</sup>, Isbell, Forest<sup>4</sup>, Roscher, Christiane<sup>5,2</sup>, van der Plas, Fons<sup>6</sup>, Boch,

9 Steffen<sup>1,7</sup>, Boenisch, Gerhard<sup>8</sup>, Buchmann, Nina<sup>9</sup>, Catford, Jane A.<sup>10</sup>, Cavender-Bares, Jeannine<sup>4</sup>,

10 Ebeling, Anne<sup>11</sup>, Eisenhauer, Nico<sup>2,3</sup>, Gleixner, Gerd<sup>8</sup>, Hölzel, Norbert<sup>12</sup>, Kattge, Jens<sup>2,8</sup>, Klaus, Valentin

11 H.<sup>9</sup>, Kleinebecker, Till<sup>13</sup>, Lange, Markus<sup>8</sup>, Le Provost, Gaëtane<sup>14</sup>, Meyer, Sebastian T.<sup>15</sup>, Molina-

12 Venegas, Rafael<sup>1,16</sup>, Mommer, Liesje<sup>17</sup>, Oelmann, Yvonne<sup>18</sup>, Penone, Caterina<sup>1</sup>, Prati, Daniel<sup>1</sup>, Reich,

13 Peter B.<sup>19,20</sup>, Rindisbacher, Abiel<sup>1</sup>, Schäfer, Deborah<sup>1</sup>, Scheu, Stefan<sup>21,22</sup>, Schmid, Bernhard<sup>23,24</sup>, Tilman,

14 David<sup>25,26</sup>, Tschamtko, Teja<sup>27</sup>, Vogel, Anja<sup>2,3,11</sup>, Wagg, Cameron<sup>28</sup>, Weigelt, Alexandra<sup>2,29</sup>, Weisser,

15 Wolfgang W.<sup>15</sup>, Wilcke, Wolfgang<sup>30</sup>, Manning, Peter<sup>14</sup>

16

17 **Affiliations:**

18 1. Institute of Plant Sciences, University of Bern, Altenbergrain 21, 3013 Bern, Switzerland

19 2. German Centre for Integrative Biodiversity Research (iDiv) Halle-Jena-Leipzig, Deutscher Platz 5e, 04103

20 Leipzig, Germany

21 3. Leipzig University, Institute of Biology, Deutscher Platz 5e, 04103 Leipzig, Germany

22 4. Department of Ecology, Evolution and Behavior, University of Minnesota, 1479 Gortner Ave, Saint Paul MN

23 55108

24 5. UFZ, Helmholtz Centre for Environmental Research, Department Physiological Diversity, Permoserstrasse 15,

- 2  
25 04318 Leipzig, Germany
- 26 6. Systematic Botany and Functional Biodiversity, Institute of Biology, Leipzig University, Johannisallee 21-23,  
27 04103 Leipzig, Germany
- 28 7. WSL Swiss Federal Research Institute, Zürcherstr. 111, 8903 Birmensdorf, Switzerland
- 29 8. Max Planck Institute for Biogeochemistry, Hans-Knoell Str. 10, 07745 Jena, Germany
- 30 9. Institute for Agricultural Sciences, ETH Zürich, Universitätstr. 2, 8092 Zürich, Switzerland
- 31 10. Department of Geography, King's College London, 30 Aldwych, London, WC2B 4BG, UK
- 32 11. Institute of Ecology and Evolution, University of Jena, Dornburger Str. 159, 07743 Jena, Germany
- 33 12. Institute of Landscape Ecology, University of Münster, Heisenbergstr. 2, 48149 Münster, Germany
- 34 13. Institute of Landscape Ecology and Resources Management, Giessen University, Heinrich-Buff-Ring 26,  
35 35392 Giessen, Germany
- 36 14. Senckenberg Gesellschaft für Naturforschung, Senckenberg Biodiversity and Climate Research Centre  
37 (SBIK-F), Senckenberganlage 25, 60325 Frankfurt, Germany
- 38 15. Terrestrial Ecology Research Group, School of Life Sciences Weihenstephan, Technical University of  
39 Munich, Hans-Carl-von-Carlowitz-Platz 2, 85354 Freising, Germany
- 40 16. Departamento de Ciencias de la Vida, Universidad de Alcalá, 28871 Madrid, Spain
- 41 17. Plant Ecology and Nature Conservation Group, Dept. of Environmental Sciences, Wageningen University,  
42 PO box 47; 6700 AA, Wageningen, the Netherlands
- 43 18. Geocology, Geoscience Department, University of Tübingen, Rümelinstr. 19-23, 72070 Tübingen, Germany
- 44 19. Department of Forest Resources, University of Minnesota, 1530 Cleveland Avenue N, St. Paul, MN 55108,  
45 USA
- 46 20. Hawkesbury Institute for the Environment, Western Sydney University, Penrith South DC, NSW 2751,  
47 Australia
- 48 21. JF Blumenbach Institute of Zoology and Anthropology, University of Goettingen, Untere Karspüle 2, 37073  
49 Göttingen, Germany
- 50 22. Centre for Biodiversity and Sustainable Land Use, Von-Siebold Str. 8, University of Goettingen, 37075

- 3  
51 Göttingen, Germany
- 52 23. Department of Geography, University of Zürich, Winterthurerstrasse 190, 8057 Zürich, Switzerland
- 53 24. Institute of Ecology, College of Urban and Environmental Sciences, Peking University, 100871 Beijing,  
54 China
- 55 25. Department of Ecology, Evolution, and Behavior, University of Minnesota, St. Paul, MN, 55108, USA
- 56 26. Bren School of Environmental Science and Management, University of California, Santa Barbara, CA,  
57 93106, USA
- 58 27. Agroecology, Dept. of Crop Sciences, University of Göttingen, Grisebachstrasse 6, 37077 Göttingen
- 59 28. Department of Evolutionary Biology and Environmental Studies, University of Zürich, Winterthurerstrasse  
60 190, Zürich CH-8047, Switzerland
- 61 29. Leipzig University, Institute of Biology, Johannisallee 21-23, 04103 Leipzig, Germany
- 62 30. Karlsruhe Institute of Technology (KIT), Institute of Geography and Geoecology, Reinhard-Baumeister-Platz  
63 1, 76131 Karlsruhe, Germany
- 64
- 65 **Materials and Correspondence:** Please address requests to [malte.jochum@idiv.de](mailto:malte.jochum@idiv.de).

4

## 66 **Summary**

67 A large body of research shows that biodiversity loss can reduce ecosystem functioning, thus providing  
68 support for the conservation of biological diversity<sup>1-4</sup>. Much of the evidence for this relationship is  
69 drawn from biodiversity-ecosystem functioning experiments (hereafter: biodiversity experiments), in  
70 which biodiversity loss is simulated by randomly assembling communities of varying species diversity,  
71 and ecosystem functions are measured<sup>5-9</sup>. This random assembly has led some ecologists to question  
72 the relevance of biodiversity experiments to real-world ecosystems, where community assembly may  
73 often be non-random and influenced by external drivers, such as climate or land-use intensification<sup>10-18</sup>.  
74 Despite these repeated criticisms, there has been no comprehensive, quantitative assessment of how  
75 experimental and real-world plant communities really differ, and whether these differences invalidate  
76 the experimental results. Here, we compare data from two of the largest and longest-running grassland  
77 biodiversity experiments globally (Jena Experiment, Germany; BioDIV, USA) to related real-world  
78 grassland plant communities in terms of their taxonomic, functional, and phylogenetic diversity and  
79 functional-trait composition. We found that plant communities of biodiversity experiments have greater  
80 variance in these compositional features than their real-world counterparts, covering almost all of the  
81 variation of the real-world communities (82-96%) while also containing community types that are not  
82 currently observed in the real world. We then re-analysed a subset of experimental data that included  
83 only ecologically-realistic communities, i.e. those comparable to real-world communities. For ten out  
84 of twelve biodiversity-ecosystem functioning relationships, biodiversity effects did not differ  
85 significantly between the full dataset of biodiversity experiments and the ecologically-realistic subset  
86 of experimental communities. This demonstrates that the results of biodiversity experiments are largely  
87 insensitive to the inclusion/exclusion of unrealistic communities. By bridging the gap between  
88 experimental and real-world studies, these results demonstrate the validity of inferences from  
89 biodiversity experiments, a key step in translating their results into specific recommendations for real-



5  
90 world biodiversity management.

6

91 **Main Text**

92 Concerns over the consequences of biodiversity loss for human well-being triggered the growth of  
93 biodiversity-ecosystem functioning (hereafter: biodiversity-functioning) research, an important field of  
94 ecology over the past 25 years<sup>1,3,19–21</sup>. Some of the most influential studies in this field are based on  
95 biodiversity-ecosystem functioning experiments (hereafter: biodiversity experiments), in which  
96 communities of varying diversity are randomly assembled and the responses of ecosystem processes  
97 are measured<sup>6,22</sup>. These experiments, often conducted using grassland communities<sup>8</sup>, aim to isolate the  
98 effects of species richness from other factors known to affect ecosystem processes, such as climate,  
99 nutrient availability, and the presence of particular plant functional types. By doing so, they have  
100 provided strong evidence that biodiversity can affect the functioning of ecosystems – most commonly  
101 with a positive log-linear relationship between diversity and plant productivity<sup>1,2,5,7,21,23,24</sup>. However, the  
102 relevance of biodiversity experiments to real-world ecosystems (i.e. those where community assembly  
103 is influenced by external drivers, such as climate or land-use) has been repeatedly questioned<sup>10–14,18</sup>.  
104 Criticisms highlight several common features of experimental designs, namely random assembly, as  
105 opposed to the non-random assembly/disassembly of real-world ecosystems<sup>13</sup>, initial sowing of even  
106 species abundances (but see <sup>25–28</sup>), and the repeated removal of non-target species (but see <sup>29,30</sup>). These  
107 factors may alter community assembly processes, leading to unrealistic communities that possess  
108 functional properties that are rare or absent in the real world. Although numerous researchers have  
109 argued for the relevance of biodiversity experiments<sup>15,17,31,32</sup> and provided evidence to counter these  
110 criticisms<sup>26,33,34</sup>, we do not know how closely plant communities in biodiversity experiments resemble  
111 those of related real-world ecosystems (but see <sup>35</sup> for a local-scale comparison), or if the presence of  
112 unrealistic communities affects the conclusions drawn from these experiments. Here we perform a  
113 comprehensive, quantitative assessment of the differences and similarities between plant communities  
114 from biodiversity experiments and related real-world ecosystems and test the applicability of

7

115 experimental results to real-world ecosystems.

116         We quantitatively compared the plant communities of the World’s largest and longest-running  
117 grassland biodiversity experiments to those of nearby real-world communities where diversity  
118 gradients are created by natural environmental variation and global change drivers. These experiments  
119 are the Jena Experiment, established 2002 in Germany (hereafter: Jena Experiment)<sup>6,30</sup> and the BioDIV  
120 experiment, established 1994 at the Cedar Creek Ecosystem Science Reserve, Minnesota, USA  
121 (hereafter: BioDIV)<sup>5,36–38</sup> (**Fig. 1**). We compared experimental communities from the Jena Experiment  
122 with those of agricultural grasslands in three regions of Germany, spanning a broad range of site  
123 conditions and land-use intensities – the Biodiversity Exploratories<sup>39,40</sup> – and semi-natural grasslands  
124 close to the Jena Experiment (hereafter: “Jena real world”). BioDIV’s experimental communities were  
125 compared to nearby, naturally-assembled prairie-grassland communities at Cedar Creek, including  
126 fertilized grasslands<sup>33,41,42</sup> and those undergoing successional change<sup>43</sup> (see Methods and Supporting  
127 Information, Table S1). We combined species-specific cover data from annual vegetation surveys  
128 (3,330 and 9,954 plot-year combinations in the German and the US datasets, respectively) with  
129 phylogenetic information and plant functional-trait data to characterize and quantitatively compare  
130 communities based on a range of properties known to influence ecosystem functioning<sup>44,45</sup>, including  
131 measures of taxonomic diversity and evenness, phylogenetic diversity, functional diversity and  
132 community abundance-weighted means (CWM) of selected functional traits of vascular plants,  
133 hereafter referred to as “community properties” in a Principal Component Analysis (PCA) (see  
134 Methods, **Fig. 1**).

135         The results of our comparison showed that experimental plant communities occupy a larger area  
136 of multivariate community-property space than real-world communities, despite the latter covering a  
137 wide range of climatic, edaphic and management conditions, particularly in the German  
138 dataset<sup>39,46</sup> (**Fig. 1a,e**). Furthermore, 82-96% of real-world communities were nested within the space

8

139 occupied by experimental communities, and additional data collected at Jena showed that experimental  
140 communities migrated towards the space occupied by real-world communities when not weeded  
141 (Supporting Information Fig. S1). Across both the German and the US datasets, the properties that  
142 differed most strongly between experimental and real-world plant communities were mean nearest  
143 taxon distance (MNTD), Simpson's evenness (SEve), and CWM seed mass, which were typically  
144 higher in experimental than in real-world communities (Supporting Information, Fig. S2 and S3 and  
145 Table S2 and S3). These findings were robust to the inclusion or exclusion of particular community  
146 properties (Supporting Information, Fig. S4 and S5b,d and Table S4 and S5).

147 Overall, three conclusions can be drawn from this comparative analysis: first, biodiversity  
148 experiments successfully create plant communities that vary greatly in functionally-important  
149 community properties. Second, real-world communities are confined to narrower regions of  
150 multivariate community-property space compared with experiments. Third, while the properties of  
151 many experimental communities are not observed in related real-world communities, our findings show  
152 that a subset of randomly-assembled experimental communities are comparable to real-world  
153 communities, (**Fig. 1**), even though their taxonomic community composition might differ.

154 In the second step of our analysis, we identified "unrealistic" (i.e., unobserved in the real world)  
155 plant communities in biodiversity experiments and tested the sensitivity of biodiversity-ecosystem  
156 functioning relationships to the exclusion of these communities. To do this, we identified plots from  
157 biodiversity experiments whose communities fell outside the multidimensional community-property  
158 space occupied by real-world plant communities (hereafter: "unrealistic communities"). This was  
159 achieved by calculating the intersection of three-dimensional convex hull volumes defined by  
160 experimental and real-world communities (**Fig 1**; see Methods for alternative analyses). When using  
161 the full set of community properties, 28% and 77% of experimental plots were deemed realistic in Jena  
162 and BioDIV, respectively. These realistic biodiversity-experiment communities had significantly higher

9

163 sown diversity (Jena:  $av = 21.7$  realistic vs.  $3.5$  unrealistic, BioDIV:  $7.8$  vs.  $1.7$ ; **Fig 2**) and more sown  
164 functional groups (Jena:  $2.8$  vs.  $1.9$ , BioDIV:  $3.5$  vs.  $1.5$ ), but lower Simpson's evenness (Jena:  $0.5$  vs.  
165  $0.7$ , BioDIV:  $0.6$  vs.  $0.9$ ; **Fig. 1**) than the unrealistic communities. However, realistic and unrealistic  
166 experimental communities did not differ in most functional trait CWMs (both Jena Experiment and  
167 BioDIV; see **Fig. 1**, Supporting Information, Fig. S6 and S7, Table S6 and S7).

168 Finally, we fitted simple linear models to test how plant species richness affected eight selected  
169 ecosystem functions from both the above- and belowground subsystems. These were: plant  
170 aboveground and belowground biomass, plant aboveground C:N ratio, soil carbon (C) content,  
171 invertebrate leaf herbivory, soil microbial biomass C, phosphatase activity in the soil and pollinator  
172 abundance (**Fig. 2**). This was done for both the full datasets and the subset of realistic plots. In both  
173 experiments, and across the different ecosystem functions, the slopes of experimental biodiversity-  
174 functioning relationships were remarkably insensitive to the removal of unrealistic communities. A  
175 paired t-test of unconstrained versus constrained slopes showed no significant change in slope  
176 estimates ( $t=1.40$ ,  $df=11$ ,  $p=0.19$ ) and confidence intervals for slope estimates overlapped each other's  
177 mean for all but two model pairs. The two exceptions to this were both initially weak biodiversity-  
178 functioning relationships: Jena-Experiment herbivory, where the positive slope increased when  
179 constrained to realistic plots, and BioDIV plant C:N, where a non-significant, slightly negative slope  
180 turned into a positive significant one (see Supporting Information Table S8). The finding that the slope  
181 of the biodiversity-functioning relationship was largely unaffected by the exclusion of unrealistic  
182 communities was robust to changing the set of community properties and the method used to identify  
183 realistic communities (Supporting Information, Fig. S8). The goodness of fit (adjusted  $R^2$  values) was  
184 also not strongly affected by constraining the dataset (mean:  $0.24$  versus  $0.15$  for unconstrained and  
185 constrained models, respectively; Supporting Information, Table S8), and the average percentage  
186 change in maximum functioning was  $\pm 10.3\%$  (SE:  $4\%$ ; Supporting Information, Table S9). Together,

10  
187 these, results show that the form, strength, and magnitude of the relationship between biodiversity and  
188 functioning that has been identified in biodiversity experiments is generally robust to the removal  
189 unrealistic communities.

190 To check whether the results of the analyses of constrained versus unconstrained communities  
191 might have been influenced by the smaller sample size of the former, we assessed the sensitivity of the  
192 results to reduced replication. In four out of twelve cases, constraining data led to a change from a  
193 significant to a non-significant relationship (Jena soil organic C content, root biomass, soil microbial  
194 biomass C and phosphatase activity; **Fig. 2**). By performing a sensitivity analysis in which we  
195 randomly reduced the unconstrained dataset to the same size as the realistically constrained dataset  
196 (Supporting Information Fig. S9), we found that the slope of the biodiversity-functioning relationship  
197 in the realistic subset for these four relationships was shallower than most random-selection slopes.  
198 This suggests for certain ecosystem functions, particularly soil processes, that the slope of the real-  
199 world biodiversity-functioning relationship might differ from that observed in biodiversity  
200 experiments.

201 Changes in biodiversity-functioning relationships caused by constraining were partly caused by  
202 a reduction in the underlying species richness gradient in Jena. Here, minimum species richness  
203 changed from 1 to 3.7 between unconstrained and constrained plots. For BioDIV, which covers a  
204 relatively narrower range of species richness, the gradient was not reduced (**Fig. 2** and Supporting  
205 Information, Table S10). The shorter species richness gradient was associated with a reduction in the  
206 range of functioning covered across the reduced biodiversity gradient. Overall, reductions were 31% in  
207 Jena and 7% in BioDIV (Supporting Information, Table S10). As such, the low diversity levels in the  
208 Jena Experiment, although needed for experimental design that can identify diversity effects and their  
209 underlying mechanisms<sup>47</sup>, are generally found to be unrealistic when compared to current German real-  
210 world communities.

11  
211 Our results show that the biodiversity-functioning relationships observed in biodiversity  
212 experiments are not an experimental artefact caused by the presence of unrealistic communities, and  
213 that the mechanisms observed in these experiments are also likely to operate in real-world  
214 communities<sup>5,9,30,32,47</sup>. The question remains, however, how important biodiversity-functioning  
215 relationships are as drivers of ecosystem functioning in the real world relative to factors such as land  
216 use or climate<sup>7,14,48</sup>. Although strong and positive biodiversity-functioning relationships have been  
217 reported in real-world studies<sup>4,22,34,49–51</sup>, other studies describe weak or negative relationships<sup>4,52,53</sup>. This  
218 inconsistency, and the discrepancy between experimental and real-world patterns, is commonly  
219 attributed to the presence of covarying environmental or biological factors that also drive ecosystem  
220 functioning<sup>54</sup>, and which obscure, confound or negate the effects of biodiversity (e.g., nutrient  
221 availability, climate, and the dominant functional traits of the community,<sup>50,55–57</sup>). These factors are  
222 likely to be closely coupled in real-world ecosystems, but decoupled in experiments. Indeed, across our  
223 datasets, the average correlation strength of the eight measures of dominant functional traits (CWM's)  
224 with Simpson's evenness, functional, and phylogenetic diversity properties was higher in real-world  
225 than in experimental data subsets; mean absolute correlation coefficients were 0.18 and 0.22 in German  
226 and American real-world sites, compared to 0.08 and 0.16 in their respective experiments (Supporting  
227 Information, Table S11 and S12).

228 While the biodiversity experiments used in our analysis cover a wide range of plant-community  
229 properties, only a fraction of this multidimensional space is occupied by related real-world  
230 communities. The remainder of space covered by the experimental communities is currently not  
231 observed in the real-world communities that we considered; however, this “unrealized plant community  
232 property space” may be useful in predicting ecosystem functioning in the future, when novel  
233 combinations of species and environmental conditions may emerge<sup>31,58</sup>.

234 In conclusion, we show that although biodiversity experiments deliberately include plant

12

235 communities that may not currently occur under real-world conditions, excluding those communities  
236 does not result in significantly-altered biodiversity-functioning relationships in most cases. Our results  
237 complement previous reports of significant biodiversity-functioning relationships in the real  
238 world<sup>4,34,40,49,51,55</sup> by showing that constraining experimental datasets to contain only realistic plant  
239 communities does not change the core conclusions of biodiversity-functioning research. To advance  
240 this field, we must acknowledge both the strengths and limitations of biodiversity experiments.  
241 Specifically, our improved understanding should be used to develop a new generation of experiments,  
242 e.g. that focus on realistic patterns of community change. At the same time, we must maintain and  
243 further examine the valuable resource of long-term biodiversity experiments, e.g. by re-analyzing  
244 existing experimental data to simulate a range of possible biodiversity-change scenarios. By moving  
245 beyond critiques of experimental design and placing experimental biodiversity-functioning research in  
246 the context of natural communities, we advance the current debate from verbal arguments to a  
247 quantitative investigation, thus increasing the robustness and applicability of biodiversity-functioning  
248 research.



13

## 249 **Material and Methods**

### 250 **1. Overview and data origin**

251 We chose the largest (Jena) and longest-running (BioDIV) grassland biodiversity experiments in the  
252 world for our comparison. The Jena Experiment<sup>6,30</sup> was chosen as a Central-European example of a  
253 long-term, intensively studied biodiversity experiment<sup>30,59</sup>. In the Jena “main” experiment,  
254 combinations of 1, 2, 4, 8, 16 and 60 species from a pool of 60 Arrhenatherion grassland species<sup>60</sup> were  
255 sown in 82 originally 20 m × 20 m plots on a former agricultural field in 2002. This species richness  
256 gradient was crossed with a gradient of functional group richness (1 to 4 functional groups; small  
257 herbs, tall herbs, grasses, legumes), where species were randomly chosen from the respective  
258 functional groups<sup>6</sup>. Jena Experiment plots are maintained by weeding (two or three times a year). All  
259 plots are mown twice per year and mown biomass is removed, a common management of meadows in  
260 the region, and do not receive any fertilizers. The Jena Experiment includes two invasion sub-  
261 experiments; one set of Jena “invasion” plots was not weeded after initial sowing and studied regularly  
262 until 2009, another set was weeded initially, but weeding was stopped in 2010; here, we use the former  
263 for 2003–2009 and the latter for 2010–2015. Jena mown “succession” plots were not initially sown and  
264 are excluded from all management except for the mowing.

265 As a real-world counterpart to the Jena Experiment, we chose the grassland plots of the  
266 Biodiversity Exploratories project (hereafter: “German real world”). This large-scale, long-term  
267 research project was established in 2006 to assess the effects of land-use intensity on biodiversity and  
268 ecosystem functioning in three regions of Germany<sup>39</sup>. The 150 grassland plots measure 50 m × 50 m  
269 and were selected to cover a wide and representative range of land-use intensities, here composed of  
270 varying levels of mowing frequency, grazing intensity and fertilization<sup>61</sup>. Species richness in  
271 Exploratories grasslands ranged from nine to 70 species, within a 4 m × 4 m subplot, across all years  
272 used in our study. Exploratories data were augmented by the inclusion of data from 14 semi-natural

14  
273 grassland plots in the Saale river valley near the Jena Experiment (unpublished data; hereafter: “Jena  
274 real-world”). These plots are usually mown twice per year; most are unfertilized and some are  
275 moderately fertilized.

276 The Cedar Creek biodiversity experiment e120 (hereafter: “BioDIV”;<sup>5,36,37,62</sup>) was selected as a  
277 North-American example of a long-term biodiversity experiment, along with a suite of other naturally-  
278 assembled grasslands at Cedar Creek that served as nearby real-world communities. BioDIV was  
279 established in 1994, when 1, 2, 4, 8 or 16 species were randomly drawn from an 18-species pool and  
280 sown across 168 13 m × 13 m plots at the Cedar Creek Ecosystem Science Reserve in Minnesota,  
281 USA.

282 Several datasets of local experiments and observation plots served as local real-world  
283 comparison for BioDIV. Experiments e001 (hereafter: “Fertilization 1”) and e002 (hereafter:  
284 “Fertilization 2”) were set up in 1982 to study the long-term effects of fertilization with nitrogen and  
285 other nutrients, ranging from low rates of nutrient inputs that are similar to atmospheric N deposition  
286 rates to high rates of fertilization similar to that used in agriculture. They consist of 324 plots located  
287 across three successional grassland fields (324 plots = 2 fertilization experiments × 3 old fields × 9  
288 fertilization treatments × 6 replicates) that differ in their age since abandonment from agriculture and  
289 45 plots in one never-plowed oak savannah in Fertilization 1 (45 plots = 9 nutrient treatments × 5  
290 replicates)<sup>41</sup>. Plot sizes were 4 m × 4 m in the younger fields and 2 m × 4 m in the oak savannah. In  
291 contrast to Fertilization 1, Fertilization 2 plots were agriculturally disked before receiving nutrient  
292 addition treatments. Plot-level species richness in the two fertilization studies ranged from one to 28  
293 species across all years used in our study. Established in 1983 and 1989, the Cedar Creek project e014  
294 (hereafter “Old field succession chronosequence”) offers vegetation data from four to six observational  
295 transects in each of 23 different fields repeated seven times between 1983 and 2011 to study succession  
296 after agricultural abandonment<sup>43</sup>. Cedar Creek project e093 (hereafter: “Oak savannah”), established in

15  
297 1991, offers data from 30  $2\text{ m} \times 2\text{ m}$  prairie opening plots of natural vegetation<sup>63,64</sup>. This combination of  
298 Cedar Creek datasets was chosen to represent a variety of real-world plant communities that were  
299 comparable to the BioDIV experiment. Note that while Central European grasslands depend on  
300 anthropogenic management (mowing, grazing) to prevent succession to forest, the US prairies are  
301 naturally fire-disturbed, hence the selection of agricultural sites as the German real-world grassland.  
302 Please note that while all above-described datasets were used in the multivariate analysis of plant  
303 community property overlap (**Fig. 1a,b,e,f**), only a subset was used in constraining the biodiversity  
304 experiment data to realistic sites (**Fig. 1c,d,g,h**; see below). For an overview of the datasets used in this  
305 study and online resources to obtain the original data, see Table S1 in Supporting Information.

306

## 307 **2. Plant-community properties**

### 308 *Vascular plant cover and biomass*

309 In the Jena Experiment, vegetation surveys were performed annually in the second half of May on a 3  
310  $\text{m} \times 3\text{ m}$  subplot of each plot and species-specific cover data was collected. Note that, in the Jena  
311 “main” plots, only target species (vascular plants originally sown in the respective plots) were  
312 recorded. Vegetation surveys of the invasion and succession plots were performed annually in  $2\text{ m} \times$   
313  $2.25\text{ m}$  subplots (2003-2009) or  $3\text{ m} \times 3\text{ m}$  subplots (2010-2015), assessing all present species. We used  
314 Jena vegetation data from 2003–2015 (succession data only from 2003–2009). In the Biodiversity  
315 Exploratories (German real-world plots), species-specific vascular plant cover was estimated annually  
316 in a  $4\text{ m} \times 4\text{ m}$  subplot of each plot between Mid-May and Mid-June. Here, we used all data from  
317 2008-2015. Data from the  $3\text{ m} \times 3\text{ m}$  vegetation surveys of Jena real-world plots was available for May  
318 2011. To test if the different vegetation survey areas in Jena and the Biodiversity Exploratories might  
319 bias the relative abundance of vascular plant species and thus the calculation of abundance-weighted  
320 community properties, a separate survey of 27 Biodiversity Exploratories plots was performed by

16

321 sampling species-specific cover in series of nested 4 m × 4 m, 3 m × 3 m and 2 m × 2 m subplots. As  
322 cover estimates did not show any sign of systematic variation (Supporting Information, Fig. S10), we  
323 concluded that the different survey areas were unlikely to bias our results.

324 For BioDIV, a combination of species-specific cover data (1996–2000) and species-specific  
325 aboveground peak biomass (2001–2015) data was used to calculate plant community relative  
326 abundance. Previous analyses have shown that this difference in methodology does not affect the  
327 conclusions of analyses investigating species-richness effects on biomass<sup>65</sup>. Cover estimates for  
328 BioDIV were obtained by averaging the estimates from four permanently-marked subplots (each 0.5 m  
329 × 1 m) within each plot. Species-specific biomass in BioDIV was obtained by annually clipping 0.1 m  
330 × 6 m strips on each plot, drying and sorting the resulting biomass to species.

331 For Fertilization 1 and Fertilization 2, species-specific plant aboveground biomass data was  
332 collected annually at peak biomass by clipping a 0.1 m × 3 m strip of vegetation per plot, sorting and  
333 drying it. Years 1982–2004 were used for Fertilization 1 and 1982–1991 for Fertilization 2 as these  
334 years maintained the original, balanced treatment design, which was later changed to add further  
335 treatments. For the old field succession chronosequence plots, species-specific cover values were used  
336 for seven years between 1983 and 2011. Each of the 23 fields had four transects (except for two fields  
337 with six transects) of 25 subplots each. For comparability to the other datasets, the 25 transect subplots  
338 of 0.5 m × 1 m in each transect were treated as one plot by averaging species-specific cover values  
339 across the subplots within transects resulting in four (or six) plots for each of the 23 fields (96 plots=21  
340 fields × 4 plots + 2 fields × 6 plots). For the oak savannah dataset, only plant species cover from 1991  
341 was used; later years were excluded because they were affected by a seed addition treatment. Species-  
342 specific cover was averaged across the 16 0.5 m × 0.5 m subplots per plot.

343 For comparative analyses, different years were chosen for these different datasets due to  
344 varying availability of measurements and in order to choose years with consistently balanced design of

17

345 the experimental treatments in cases where treatments were added after the onset of the experiments.  
346 The transects in the old field succession chronosequence are likely to inflate certain community  
347 properties because their subplots span out further across the respective sites than a square plot of the  
348 same area would. Similarly, the averaging across subplots in the oak savannah dataset might influence  
349 the direct comparability to the biodiversity experiment data. As such, the data from the old field  
350 succession chronosequence and the oak savannah dataset are shown in **Fig. 1e** to put the BioDIV data  
351 into perspective by adding different kinds of real-world data. However, when it came to constraining  
352 biodiversity experiment data with the real-world data (**Fig. 1g**), we took a conservative approach and  
353 included only those real-world datasets that were most comparable in terms of plot types (Fertilizer 1  
354 and 2; hereafter: Combined US real world). Similarly, for the Jena Experiment real-world counterparts,  
355 we considered only the German real world and Jena real-world sites as purely non-biodiversity  
356 experiment sites in **Fig. 1c** (hereafter: Combined German real world).

357 To enable direct comparisons of plant communities, species-specific cover and biomass values  
358 for all projects were transformed to relative abundance where the single abundance values within each  
359 community sum to 100. In order to do this, all Jena Experiment cover values (originally estimated on a  
360 decimal scale, <sup>66</sup>) were first transformed to percent cover values<sup>67</sup>. Bare ground was ignored, so where  
361 vegetation covered <100% of the plot, it was scaled to 100% for the calculation of community  
362 properties.

363

### 364 *Species synonyms and phylogeny*

365 As we used plant species cover, biomass, and trait data from multiple sources based on research across  
366 decades and different geographic regions, there was considerable variation in the classification and  
367 nomenclature of species. Additionally, since the TRY database<sup>68</sup> was queried for plant traits and we also  
368 used a phylogenetic backbone tree (see below), the various datasets contained species names that might

18

369 not all be currently accepted names, challenging the linkage of the different datasets. This issue was  
370 dealt with by creating “code” data frames connecting all original spellings, outdated and synonym  
371 names to the names for which data was available and to the accepted species names obtained using The  
372 Plant List via function “TPL” in R package “Taxonstand”<sup>69</sup>.

373 To calculate phylogenetic diversity metrics and to use phylogenetic relatedness to assist the  
374 imputation of missing trait data, a phylogenetic tree of all plant species was created and included in our  
375 study. We adopted the nomenclatural criteria in The Plant List v. 1.1<sup>70</sup> for the species in our dataset, and  
376 pruned the updated vascular plant megaphylogeny by Qian & Jin<sup>71</sup> to include only the species in our  
377 study (n = 664). We used the software SUNPLIN<sup>72</sup> to add the species lacking from the megaphylogeny  
378 (n=132 or 19.9% of all species in our study) at random within the crown nodes of the corresponding  
379 monophyletic genera. In a few cases where the genera of the missing species were polyphyletic  
380 (*Potentilla*, *Medicago*, *Solidago*, *Galium*) or paraphyletic (*Calamagrostis*, *Vicia*), we inserted the  
381 species at random within the nodes representing the most recent common ancestors that unequivocally  
382 contain them (see <sup>73</sup>). We repeated this procedure iteratively to obtain 50 phylogenetic trees (see  
383 Supporting Information, Fig. S11 for one example tree and the distribution of randomly inserted  
384 species). When using the phylogenetic trees in the subsequent data analysis (calculation of  
385 phylogenetic diversity metrics and plant trait imputation), all 50 trees were used and results were  
386 averaged.

387

### 388 *Functional trait data*

389 In order to calculate community weighted mean trait values for all plant communities, functional trait  
390 data from the TRY database (see Supporting Information, Table S15) were complemented with in-situ  
391 collected trait data from Cedar Creek and not published in TRY. Plant species specific functional trait  
392 values were calculated separately for the German and US species subsets.

19

393 Trait data for leaf area (mm<sup>2</sup>), leaf dry mass (mg), leaf dry matter content (LDMC, g/g), leaf  
394 nitrogen concentration (leaf N, mg/g), leaf phosphorus concentration (leaf P, mg/g), plant height (m),  
395 specific leaf area (SLA, mm<sup>2</sup>/mg) and seed mass (dry mass in mg) were assembled (Cornelissen et al.  
396 2003). These traits were selected as they are important for ecosystem functioning<sup>44,45</sup> and data for them  
397 was available. For the details of processing TRY and other trait data to generate species-level values,  
398 see Supporting Methods.

399 To fill gaps in trait data, trait values from same-genus species with available trait information  
400 were inferred. Subsequently, the “phylopars” function in the R package “Rphylopars”<sup>74</sup> was employed  
401 to impute missing data based on available information on other traits and the phylogenetic tree<sup>75</sup>.  
402 Before imputation, all trait data was natural-log transformed. To account for phylogenetic uncertainty  
403 (see above), trait data for all 50 phylogenetic trees was imputed and averaged. Subsequently, the plant  
404 species and their trait values were visualized in a PCA for each region (Supporting Information, Fig.  
405 S12) to check for strong outliers and check the outlier-species’ ability to score extreme values.

406

#### 407 *Calculation of plant-community properties*

408 Before calculating plant-community properties, tree species, occurred as seedlings, were removed from  
409 all datasets, because of their strong impact on the calculated CWM’s and functional metrics, and the  
410 fact that biodiversity experiments are mown annually thus preventing tree invasion. Plant-community  
411 properties were calculated for each plot-year combination so that the temporal development  
412 (succession) of plots was accounted for in our analysis. As taxonomic diversity indices, we calculated  
413 species richness (S), Shannon’s diversity (H), Simpson’s diversity index (D1), and inverse Simpson’s  
414 diversity index (D2) (calculated as  $D1=1/D$  and  $D2=1/D$ , where D is the sum over all  $\pi_i^2$  and  $\pi_i$  are  
415 the relative abundances of all species  $i$ ) with functions “specnumber” and “diversity” in R package  
416 “vegan”<sup>76</sup> and Simpson’s evenness (SEve, by dividing D2 by S)<sup>77-80</sup>. As phylogenetic diversity indices,

20  
417 we used Faith's phylogenetic diversity (PD), mean pairwise distance (MPD), and mean nearest taxon  
418 distance (MNTD)<sup>81</sup> with functions "pd", "mpd" and "mtd" in R package "picante"<sup>82</sup>, where MPD and  
419 MNTD were calculated with abundance-weighting. All three phylogenetic diversity properties were  
420 calculated for each of the 50 phylogenetic trees and averaged to account for phylogenetic uncertainty  
421 (see above). For the calculation of the functional diversity indices functional richness (FRic), functional  
422 evenness (FEve), functional divergence (FDiv), functional dispersion (FDis), Rao's quadratic entropy  
423 (RaoQ)<sup>83-85</sup> and community weighted mean traits (CWM's) the function "dbFD" in the R package  
424 "FD"<sup>84,86</sup> was used. As function "dbFD" relies on the computation of a Gower dissimilarity matrix  
425 where zero-dissimilarity values between two species (identical trait values) are not allowed, we slightly  
426 altered the trait values of a small number of species by deliberately increasing all trait values by 0.001  
427 to 0.002% for the function to run. For each of the respective species pairs, only the species with the  
428 lower overall cover (throughout the regional dataset) received this alteration (Supporting Information,  
429 Table S16). For all but FRic, the abundance-weighted versions of these indices were computed.  
430 Communities comprising less than three species were assigned a value of zero for FRic, FEve, FDiv,  
431 PD, MPD and MNTD, as their computation is not possible for such communities.

432

### 433 **3. Multivariate analysis of experiment and real-world intersection**

#### 434 *Multivariate comparison*

435 All analyses were carried out in R version 3.4.2<sup>87</sup>. Here, a multivariate PCA approach was employed,  
436 based on a number of plant-community properties to assess the distribution, similarities and differences  
437 between plant communities of biodiversity experiments and real-world systems. Prior to the analysis,  
438 we tested for multicollinearity of community properties by calculating variance inflation factors  
439 (hereafter: vif; R function "corvif" provided by <sup>88</sup>). In the German and US dataset, we sequentially  
440 removed the variables with the highest variance inflation factor until all vif values were <3. Only the



21

441 last of the eight variables to remove differed between the German and US datasets, so for comparability  
442 between regional datasets, we removed all nine variables from both datasets (see Supporting  
443 Information, Table S17 and S18). Specifically, H, FDis, S, leaf area, D1, PD, MPD, RaoQ and FDiv  
444 were removed (in order of sequential removal) and only the following 12 community properties were  
445 employed in the PCA's: D2, SEve, FRic, FEve, SLA, leaf dry mass, leaf N, leaf P, seed mass, height,  
446 LDMC, and MNTD (**Fig. 1b and f**). Separate community property PCA's were computed for the  
447 German and USA data subsets using the "rda" function in R package "vegan" (with variables scaled to  
448 avoid bias due to different range-size of properties) and the data was visualized in biplots with 95%  
449 confidence ellipses (**Fig. 1a and e**).

450

#### 451 *Intersection-calculation methods*

452 The intersection between experimental and real-world plots was calculated using three different  
453 methods of differing complexity, all based on the community-property PCA's presented in **Fig. 1a and**  
454 **e**. Intersections were calculated between two groups of data per geographic region: a) all experimental  
455 communities across all years and b) a subset of the most comparable and data-rich real-world datasets  
456 (combined real-world datasets). For Jena, the related combined real-world communities were all  
457 German real-world communities (Biodiversity Exploratories) and the Jena real-world communities. For  
458 BioDIV, only Fertilization 1 and Fertilization 2 plots were used as the combined real-world  
459 counterparts when calculating the intersections as different vegetation-survey techniques in the old  
460 field succession chronosequence and the oak savannah datasets (transects and subplots) made these  
461 data incomparable. First, the first two PCA axes were used to assess the two-dimensional intersection  
462 of 95% confidence ellipses for experimental and real-world data using the functions "ellipse" and  
463 "point.in.polygon" in R packages "car"<sup>89</sup> and "sp"<sup>90,91</sup>, respectively (Supporting Information, Fig. S4).  
464 Second, the first three PCA axes were employed to compute the intersection of three-dimensional

22

465 convex hull volumes using functions “convhulln” and “tsearchn” in R package “geometry”<sup>92</sup> (**Fig. 1c**  
466 **and g** show 2-dimensional representation of 3-dimensional convex hull volume). Third, using the first  
467 three PCA axes, three-dimensional hypervolumes were computed using the “hypervolume” package in  
468 R<sup>93</sup>. The intersection hypervolume of the experimental and real-world hypervolumes was then  
469 calculated and function “hypervolume\_inclusion\_test” was used to assess which communities fall in  
470 the intersection hypervolume (Supporting Information, Fig. S4). For the subsequent analysis of  
471 diversity-functioning (hereafter: BEF) relationships, experimental plots were defined as realistic if their  
472 plant communities fell inside the intersection in at least one of the years present in the dataset. Given  
473 this threshold, each plot in the experiments was either defined as realistic (the plot’s plant community  
474 was within the intersection in at least one year) or unrealistic. Calculating the intersection based on  
475 three different methods of different complexity demonstrated that the selection of realistic communities  
476 was largely insensitive to the underlying methodology (Supporting Information, Table S4 and S5, Fig.  
477 S5a, c). Therefore, we focus our analyses on using three-dimensional convex-hull volumes, a method  
478 of intermediate complexity, and present results for the other methods in the Supporting Information.

479

#### 480 **4. Measurement of ecosystem-function variables**

481 A range of above- and belowground ecosystem process rates and state variables was selected as  
482 ecosystem functions from the Jena Experiment and BioDIV in such a way that the functions of these  
483 experiments were as comparable as possible. Only function data obtained between 2006 and 2015 (at  
484 least 4 years after initiation of the experiments) was used because BEF relationships shortly after the  
485 initial establishment of experiments are often unrepresentative of longer-term trends<sup>24,94</sup>. These  
486 selection criteria resulted in the following functions: Plant aboveground biomass (biomass),  
487 aboveground plant biomass C:N ratio (plant C:N), soil carbon (C; only organic fraction in Jena, total  
488 soil C in BioDIV) and root biomass were available for both experiments. As inorganic C is a significant

23

489 proportion of total soil C at Jena, but not at Cedar Creek, soil organic C was used for Jena, but total soil  
490 C for BioDIV. Herbivory rate, soil microbial biomass C, phosphatase activity, and pollinator abundance  
491 were only available for Jena. For details regarding the measurement of these ecosystem functions in the  
492 Jena Experiment and BioDIV; please refer to the Supporting Methods section.

493

## 494 **5. Statistical analysis of unconstrained and constrained experimental BEF relationships**

495 In order to assess whether – and how much – BEF relationships change when excluding unrealistic  
496 plots from the analysis, each relationship was first analyzed in the unconstrained dataset with all  
497 experimental plots. Subsequently, biodiversity experiment datasets were constrained to only include  
498 realistic plots and the models were re-run. For ecosystem function variables with multiple years of data,  
499 values were averaged across years and simple linear models were fit that tested for the effect of realized  
500 target species richness ( $\log_2$ , averaged per plot between 2006 and 2015) on the individual functions.  
501 Where necessary, square-root or  $\log_{10}$ -transformation was applied to response variables to meet model  
502 assumptions of normality and homoscedasticity of variances. For each of the resulting relationships,  
503 slope estimates and their 95% confidence intervals (function “confint” in R) were calculated. Slopes  
504 and confidence intervals of each pair of constrained and unconstrained relationships were compared to  
505 decide if the slope or sign of the relationship had changed. If confidence intervals of unconstrained and  
506 constrained slopes included each other’s mean value, we concluded that they were not significantly  
507 different. Additionally, a paired t-test on differences between unconstrained and constrained slopes was  
508 performed.

509

## 510 **6. Sensitivity analyses**

511 Since our analysis involved many decisions on which variables to include and what exact analytical  
512 pathway to follow, and because we are aware that these decisions might affect our results, several

24  
513 sensitivity analyses were performed regarding different aspects of our analysis.

514         To test if different subsets of community properties entering the PCA affected our results, our  
515 analysis was re-run for all combinations of i) different subsets of community properties, i.e. (a) all 12  
516 community properties (presented in the main text), b) just the eight CWM's, or c) just the four  
517 functional diversity properties) and ii) all three methods to compute the intersection between  
518 experiment and real-world plots described above (Supporting Information, Fig. S4 and S8).

519         To test if shifts in significance of BEF relationships in **Fig. 2** simply resulted from the strong  
520 reduction of error degrees of freedom associated with using data subsets, we performed a sensitivity  
521 analysis randomly selecting the same proportion of plots as realistic that was selected by our PCA-  
522 driven selection of realistic sites, 500 times for each relationship (Supporting Information, Fig. S9).

523         To gain further insight into our findings at Jena, data from experimental plots which were  
524 abandoned and allowed to undergo natural succession (Jena invasion plots) was more closely analyzed.  
525 Over time, these migrated towards the multivariate community property space occupied by real-world  
526 communities, thus showing that differences between real-world and biodiversity experiment  
527 communities were due to experimental manipulation and maintenance rather than differences in plot  
528 conditions, species pools or initially random versus natural community assembly (Supporting  
529 Information, Fig. S1).

25

## 530 **Acknowledgements**

531 We thank the establishers, maintainers, coordinators, technical and research staff of all involved  
532 projects, data owners of all involved research projects, the TRY initiative and data owners. Santiago  
533 Soliveres, Eric Allan for discussion, Sven Thiel and Guangjuan Luo (both Jena) and Dan Bahaiddin  
534 (Cedar Creek) for help with data extraction and handling of project databases, Florian Schneider for  
535 help with processing TRY data. Thanks to Robert Junker and Benjamin Blonder for assistance with the  
536 calculation of multidimensional hypervolumes and their intersection in R. This study was funded  
537 through Jena Experiment SP 7 (Swiss National Science Foundation 310030E-166017/1). Further  
538 support came from the German Centre for Integrative Biodiversity Research (iDiv) Halle-Jena-Leipzig,  
539 funded by the German Research Foundation (FZT 118). The Jena Experiment was funded by the  
540 Deutsche Forschungsgemeinschaft (FOR 456 and FOR 1451) with additional support from the  
541 Friedrich Schiller University Jena, the Max Planck Institute for Biogeochemistry in Jena, and the Swiss  
542 National Science Foundation. All of the studies located at Cedar Creek included herein are funded by  
543 the US National Science Foundation's Long-Term Ecological Research (LTER) program (DEB-  
544 1234162) and FI acknowledges funding from the LTER Network Communications Office (DEB-  
545 1545288).

546

## 547 **Data accessibility**

548 We provide aggregated datasets with plant-community properties and ecosystem function data at first  
549 submission to enable editors and referees to run our main analyses. Currently, these datasets partly  
550 underlie project-specific embargo periods and need to be treated confidentially. All data will be a)  
551 uploaded to an online repository, b) submitted as supplemental files upon acceptance of the article or c)  
552 be made available within project databases after the respective project-defined embargo periods. Upon  
553 request by editors or referees, we are happy to provide all data at an earlier stage.

26  
554

## 555 **Code availability**

556 We provide R-code for running the main analyses and creating Fig. 1 and Fig. 2 based on aggregated  
557 datasets at first submission. All R-code for data crunching and analyses will be a) uploaded to an online  
558 repository, b) submitted as supplemental files upon acceptance of the article or c) be made available  
559 within project databases after the respective project-defined embargo periods. Upon request by editors  
560 or referees, we are happy to provide all R-code at an earlier stage.

561

## 562 **Author contributions**

563 MJ, PM, MF and FvdP conceived the idea and designed the study; all authors except for MJ, FvdP,  
564 RM-V, CP, AR and PM contributed data; MJ developed the analytical framework and analyzed the  
565 data; RM-V constructed the phylogenetic hypothesis trees; MJ and PM wrote the manuscript; all  
566 authors contributed to the discussion of results and to the writing of the manuscript.

567

## 568 **Competing interests**

569 The authors declare no competing interests.

570

## 571 **References**

- 572 1. Cardinale, B. J. *et al.* Biodiversity loss and its impact on humanity. *Nature* **486**, 59–67 (2012).
- 573 2. Tilman, D., Isbell, F. & Cowles, J. M. Biodiversity and ecosystem functioning. *Annu. Rev. Ecol.*  
574 *Evol. Syst.* **45**, 471–493 (2014).
- 575 3. Isbell, F. *et al.* Linking the influence and dependence of people on biodiversity across scales.  
576 *Nature* **546**, 65–72 (2017).
- 577 4. van der Plas, F. Biodiversity and ecosystem functioning in naturally assembled communities.  
578 *Biol. Rev.* **online-early**, (2019).
- 579 5. Tilman, D. *et al.* Diversity and productivity in a long-term grassland experiment. *Science* **294**,

- 27  
580 843–845 (2001).
- 581 6. Roscher, C., Schumacher, J. & Baade, J. The role of biodiversity for element cycling and trophic  
582 interactions: an experimental approach in a grassland community. *Basic Appl. Ecol.* **121**, 107–  
583 121 (2004).
- 584 7. Hooper, D. U. *et al.* Effects of biodiversity on ecosystem functioning: a consensus of current  
585 knowledge. *Ecol. Monogr.* **75**, 3–35 (2005).
- 586 8. Cardinale, B. J. *et al.* The functional role of producer diversity in ecosystems. *Am. J. Bot.* **98**,  
587 572–592 (2011).
- 588 9. O’Connor, M. I. *et al.* A general biodiversity–function relationship is mediated by trophic level.  
589 *Oikos* **126**, 18–31 (2017).
- 590 10. Huston, M. A. Hidden treatments in ecological experiments: re-evaluating the ecosystem  
591 function of biodiversity. *Oecologia* **110**, 449–460 (1997).
- 592 11. Grime, J. P. Benefits of plant diversity to ecosystems: Immediate, filter and founder effects. *J.*  
593 *Ecol.* **86**, 902–910 (1998).
- 594 12. Wardle, D. A. *et al.* Biodiversity and ecosystem function: an issue in ecology. *Bull. Ecol. Soc.*  
595 *Am.* **81**, 235–239 (2000).
- 596 13. Leps, J. What do the biodiversity experiments tell us about consequences of plant species loss in  
597 the real world? *Basic Appl. Ecol.* **5**, 529–534 (2004).
- 598 14. Srivastava, D. S. & Vellend, M. Biodiversity–ecosystem function research: is it relevant to  
599 conservation? *Annu. Rev. Ecol. Evol. Syst.* **36**, 267–294 (2005).
- 600 15. Duffy, J. E. Why biodiversity is important to the functioning of real-world ecosystems. *Front.*  
601 *Ecol. Environ.* **7**, 437–444 (2008).
- 602 16. Wardle, D. A. & Jonsson, M. Biodiversity effects in real ecosystems – a response to Duffy.  
603 *Front. Ecol. Environ.* **8**, 10–11 (2010).
- 604 17. Duffy, J. E. Biodiversity effects: trends and exceptions – a reply to Wardle and Jonsson. *Front.*  
605 *Ecol. Environ.* **8**, 11–12 (2010).
- 606 18. Wardle, D. A. Do experiments exploring plant diversity–ecosystem functioning relationships  
607 inform how biodiversity loss impacts natural ecosystems? *J. Veg. Sci.* **27**, 646–653 (2016).
- 608 19. Schulze, E.-D. & Mooney, H. *Biodiversity and Ecosystem Functioning*. (Springer, 1993).
- 609 20. Naeem, S., Thompson, L. J., Lawler, S. P., Lawton, J. H. & Woodfin, R. M. Declining  
610 biodiversity can alter the performance of ecosystems. *Nature* **368**, 734–737 (1994).
- 611 21. Balvanera, P. *et al.* Quantifying the evidence for biodiversity effects on ecosystem functioning  
612 and services. *Ecol. Lett.* **9**, 1146–56 (2006).

28

- 613 22. Tilman, D., Wedin, D. & Knops, J. Productivity and sustainability influenced by biodiversity in  
614 grassland ecosystems. *Nature* **379**, 718–720 (1996).
- 615 23. Loreau, M. *et al.* Biodiversity and Ecosystem Functioning: Current Knowledge and Future  
616 Challenges. *Science* **294**, 804–808 (2001).
- 617 24. Reich, P. B. *et al.* Impacts of biodiversity loss escalate through time as redundancy fades.  
618 *Science* **336**, 589–592 (2012).
- 619 25. Wilsey, B. J. & Potvin, C. Biodiversity and ecosystem functioning: Importance of species  
620 evenness in an old field. *Ecology* **81**, 887–892 (2000).
- 621 26. Wilsey, B. J. & Polley, H. W. Realistically Low Species Evenness Does Not Alter Grassland  
622 Species-Richness–Productivity Relationships. *Ecology* **85**, 2693–2700 (2004).
- 623 27. Hillebrand, H., Bennett, D. & Cadotte, M. Consequences of dominance: A Review of evenness  
624 effects on local and regional ecosystem processes. *Ecology* **89**, 1510–1520 (2008).
- 625 28. Schmitz, M. *et al.* Consistent Effects of Biodiversity on Ecosystem Functioning Under Varying  
626 Density and Evenness. *Folia Geobot.* **48**, 335–353 (2013).
- 627 29. Finn, J. A. *et al.* Ecosystem function enhanced by combining four functional types of plant  
628 species in intensively managed grassland mixtures: A 3-year continental-scale field experiment.  
629 *J. Appl. Ecol.* **50**, 365–375 (2013).
- 630 30. Weisser, W. W. *et al.* Biodiversity effects on ecosystem functioning in a 15-year grassland  
631 experiment: patterns, mechanisms, and open questions. *Basic Appl. Ecol.* **23**, 1–73 (2017).
- 632 31. Schmid, B. & Hector, A. The value of biodiversity experiments. *Basic Appl. Ecol.* **5**, 535–542  
633 (2004).
- 634 32. Eisenhauer, N. *et al.* Biodiversity-ecosystem function experiments reveal the mechanisms  
635 underlying the consequences of biodiversity change in real world ecosystems. *J. Veg. Sci.* **27**,  
636 1061–1070 (2016).
- 637 33. Isbell, F. *et al.* Nutrient enrichment, biodiversity loss, and consequent declines in ecosystem  
638 productivity. *Proc. Natl. Acad. Sci.* **110**, 11911–11916 (2013).
- 639 34. Duffy, J. E., Godwin, C. M. & Cardinale, B. J. Biodiversity effects in the wild are common and  
640 as strong as key drivers of productivity. *Nature* **549**, 261–264 (2017).
- 641 35. Buchmann, T. *et al.* Connecting experimental biodiversity research to real-world grasslands.  
642 *Perspect. Plant Ecol. Evol. Syst.* **33**, 78–88 (2018).
- 643 36. Tilman, D. *et al.* The influence of functional diversity and composition on ecosystem processes.  
644 *Science* **277**, 1300–1302 (1997).
- 645 37. Tilman, D., Reich, P. B. & Isbell, F. Biodiversity impacts ecosystem productivity as much as



- 29  
646 resources, disturbance, or herbivory. *Proc. Natl. Acad. Sci.* **109**, 10394–10397 (2012).
- 647 38. Isbell, F. *et al.* Biodiversity increases the resistance of ecosystem productivity to climate  
648 extremes. *Nature* **526**, 574–577 (2015).
- 649 39. Fischer, M. *et al.* Implementing large-scale and long-term functional biodiversity research: The  
650 Biodiversity Exploratories. *Basic Appl. Ecol.* **11**, 473–485 (2010).
- 651 40. Soliveres, S. *et al.* Biodiversity at multiple trophic levels is needed for ecosystem  
652 multifunctionality. *Nature* **536**, 456–459 (2016).
- 653 41. Tilman, D. Secondary succession and the pattern of plant dominance along experimental  
654 nitrogen gradients. *Ecol. Monogr.* **57**, 189–214 (1987).
- 655 42. Clark, C. M. & Tilman, D. Loss of plant species after chronic low-level nitrogen deposition to  
656 prairie grasslands. *Nature* **451**, 712–715 (2008).
- 657 43. Inouye, R. *et al.* Old-field succession on a Minnesota sand plain. *Ecology* **68**, 12–26 (1987).
- 658 44. Díaz, S. *et al.* The global spectrum of plant form and function. *Nature* **529**, 1–17 (2015).
- 659 45. Craven, D. *et al.* Multiple facets of biodiversity drive the diversity–stability relationship. *Nat.*  
660 *Ecol. Evol.* **2**, 1579–1587 (2018).
- 661 46. Manning, P. *et al.* Grassland management intensification weakens the associations among the  
662 diversities of multiple plant and animal taxa. *Ecology* **96**, 1492–1501 (2015).
- 663 47. Loreau, M. & Hector, A. Partitioning selection and complementarity in biodiversity experiments.  
664 *Nature* **412**, 72–76 (2001).
- 665 48. Hillebrand, H. & Matthiessen, B. Biodiversity in a complex world: consolidation and progress in  
666 functional biodiversity research. *Ecol. Lett.* **12**, 1405–1419 (2009).
- 667 49. Liang, J. *et al.* Positive biodiversity-productivity relationship predominant in global forests.  
668 *Science* **354**, aaf8957 (2016).
- 669 50. Grace, J. B. *et al.* Integrative modelling reveals mechanisms linking productivity and plant  
670 species richness. *Nature* **529**, 390–393 (2016).
- 671 51. Oehri, J., Schmid, B., Schaeppman-Strub, G. & Niklaus, P. A. Biodiversity promotes primary  
672 productivity and growing season lengthening at the landscape scale. *Proc. Natl. Acad. Sci.* **114**,  
673 10160–10165 (2017).
- 674 52. Díaz, S. *et al.* Incorporating plant functional diversity effects in ecosystem service assessments.  
675 *Proc. Natl. Acad. Sci. U. S. A.* **104**, 20684–20689 (2007).
- 676 53. Lavorel, S. *et al.* Using plant functional traits to understand the landscape distribution of  
677 multiple ecosystem services. *J. Ecol.* **99**, 135–147 (2011).
- 678 54. Schmid, B. The species richness-productivity controversy. *Trends Ecol. Evol.* **17**, 113–114

- 30  
679 (2002).
- 680 55. Maestre, F. T. *et al.* Plant species richness and ecosystem multifunctionality in global drylands.  
681 *Science* **335**, 214–218 (2012).
- 682 56. Allan, E. *et al.* Land use intensification alters ecosystem multifunctionality via loss of  
683 biodiversity and changes to functional composition. *Ecol. Lett.* **18**, 834–843 (2015).
- 684 57. van der Plas, F. *et al.* Jack-of-all-trades effects drive biodiversity-ecosystem multifunctionality  
685 relationships in European forests. *Nat. Commun.* **7**, 11109 (2016).
- 686 58. Hobbs, R. J., Higgs, E. & Harris, J. a. Novel ecosystems: implications for conservation and  
687 restoration. *Trends Ecol. Evol.* **24**, 599–605 (2009).
- 688 59. Roscher, C. *et al.* Convergent high diversity in naturally colonized experimental grasslands is not  
689 related to increased productivity. *Perspect. Plant Ecol. Evol. Syst.* **20**, 32–45 (2016).
- 690 60. Ellenberg, H. & Leuschner, C. *Vegetation Mitteleuropas mit den Alpen: in ökologischer,*  
691 *dynamischer und historischer Sicht.* (UTB, 2010).
- 692 61. Blüthgen, N. *et al.* A quantitative index of land-use intensity in grasslands: Integrating mowing,  
693 grazing and fertilization. *Basic Appl. Ecol.* **13**, 207–220 (2012).
- 694 62. Tilman, D., Reich, P. B. & Knops, J. M. H. Biodiversity and ecosystem stability in a decade-long  
695 grassland experiment. *Nature* **441**, 629–632 (2006).
- 696 63. Tilman, D. Community Invasibility, Recruitment Limitation, and Grassland Biodiversity.  
697 *Ecology* **78**, 81–92 (1997).
- 698 64. Catford, J. A. *et al.* Traits linked with species invasiveness and community invasibility vary with  
699 time, stage and indicator of invasion in a long-term grassland experiment. *Ecol. Lett.* **22**, 593–  
700 604 (2019).
- 701 65. Fargione, J. *et al.* From selection to complementarity: shifts in the causes of biodiversity-  
702 productivity relationships in a long-term biodiversity experiment. *Proc. R. Soc. B Biol. Sci.* **274**,  
703 871–876 (2007).
- 704 66. Londo, G. The decimal scale for relevés of permanent quadrats. *Vegetatio* **33**, 61–64 (1976).
- 705 67. Roscher, C. *et al.* What happens to the sown species if a biodiversity experiment is not weeded?  
706 *Basic Appl. Ecol.* **14**, 187–198 (2013).
- 707 68. Kattge, J. *et al.* TRY - a global database of plant traits. *Glob. Chang. Biol.* **17**, 2905–2935  
708 (2011).
- 709 69. Cayuela, L., Stein, A. & Oksanen, J. Taxonstand: Taxonomic Standardization of Plant Species  
710 Names. *R Packag. version 2.1* (2017).
- 711 70. The Plant List, Version 1.1. (2013). Available at: <http://www.theplantlist.org/>.

- 31
- 712 71. Qian, H. & Jin, Y. An updated megaphylogeny of plants, a tool for generating plant phylogenies  
713 and an analysis of phylogenetic community structure. *J. Plant Ecol.* **9**, 233–239 (2016).
- 714 72. Martins, W. S., Carmo, W. C., Longo, H. J., Rosa, T. C. & Rangel, T. F. SUNPLIN: Simulation  
715 with Uncertainty for Phylogenetic Investigations. *BMC Bioinformatics* **14**, (2013).
- 716 73. Rangel, T. F. *et al.* Phylogenetic uncertainty revisited: Implications for ecological analyses.  
717 *Evolution (N. Y.)*. **69**, 1301–1312 (2015).
- 718 74. Goolsby, E. W., Bruggeman, J. & Ane, C. Rphylopar: Phylogenetic Comparative Tools for  
719 Missing Data and Within-Species Variation. (2016).
- 720 75. Penone, C. *et al.* Imputation of missing data in life-history trait datasets: Which approach  
721 performs the best? *Methods Ecol. Evol.* **5**, 1–10 (2014).
- 722 76. Oksanen, J. *et al.* Vegan: community ecology package. *R Packag. version 2.3-4* (2016).
- 723 77. Magurran, A. *Measuring Biological Diversity*. (Blackwell, 2004).
- 724 78. Morris, E. K. *et al.* Choosing and using diversity indices: Insights for ecological applications  
725 from the German Biodiversity Exploratories. *Ecol. Evol.* **4**, 3514–3524 (2014).
- 726 79. Smith, B. & Wilson, J. B. A Consumer's Guide to Evenness Indices. *Oikos* **76**, 70–82 (1996).
- 727 80. Hill, M. Diversity and Evenness: A Unifying Notation and Its Consequences. *Ecology* **54**, 427–  
728 432 (1973).
- 729 81. Tucker, C. M. *et al.* A guide to phylogenetic metrics for conservation, community ecology and  
730 macroecology. *Biol. Rev.* **92**, 698–715 (2017).
- 731 82. Kembel, S. W. *et al.* Picante: R tools for integrating phylogenies and ecology. *Bioinformatics* **26**,  
732 1463–1464 (2010).
- 733 83. Villéger, S., Mason, N. W. H. & Mouillot, D. New multidimensional functional diversity indices  
734 for a multifaceted framework in functional ecology. *Ecology* **89**, 2290–2301 (2008).
- 735 84. Laliberte, E. & Legendre, P. A distance-based framework for measuring functional diversity  
736 from multiple traits A distance-based framework for measuring from multiple traits functional  
737 diversity. *Ecology* **91**, 299–305 (2010).
- 738 85. Mouchet, M. A., Villéger, S., Mason, N. W. H. & Mouillot, D. Functional diversity measures: an  
739 overview of their redundancy and their ability to discriminate community assembly rules. *Funct.*  
740 *Ecol.* **24**, 867–876 (2010).
- 741 86. Laliberté, E., Legendre, P. & Shipley, B. FD: measuring functional diversity from multiple  
742 traits, and other tools for functional ecology. (2014).
- 743 87. R Core Team. R: A Language and Environment for Statistical Computing. (2017).  
744 doi:10.1007/978-3-540-74686-7

- 32
- 745 88. Zuur, A. F., Ieno, E. N. & Elphick, C. S. A protocol for data exploration to avoid common  
746 statistical problems. *Methods Ecol. Evol.* **1**, 3–14 (2010).
- 747 89. Fox, J. & Weisberg, S. *An R Companion to Applied Regression*. (Thousand Oaks, 2011).
- 748 90. Pebesma, E. & Bivand, R. Classes and methods for spatial data. *R News* **5**, 9–13 (2005).
- 749 91. Bivand, R. S., Pebesma, E. & Gomez-Rubio, V. *Applied spatial data analysis with R*. (Springer,  
750 2013).
- 751 92. Habel, K., Grasman, R., Gramacy, R. B., Stahel, A. & Sterratt, D. C. geometry: Mesh Generation  
752 and Surface Tesselation. *R package version 0.4.1* (2019).
- 753 93. Blonder, B. & Harris, D. hypervolume: High Dimensional Geometry and Set Operations Using  
754 Kernel Density Estimation, Support Vector Machines, and Convex Hulls. *R Packag. ver. 2.0.11*  
755 (2018).
- 756 94. Meyer, S. T. *et al.* Effects of biodiversity strengthen over time as ecosystem functioning  
757 declines at low and increases at high biodiversity. *Ecosphere* **7**, e01619 (2016).

33

758 **Figures**

759 **Fig. 1 Experimental versus real-world communities.** Upper row: German comparison (n=3330 plot-  
760 year combinations). Lower row: US comparison (n=9954 plot-year combinations). a-c and e-g: First  
761 two axes of a PCA on 12 plant-community properties (see panels b and f, variance-inflation factor-  
762 selected community weighted mean traits, functional diversity metrics, phylogenetic diversity and  
763 taxonomic diversity metrics), where each dot represents a single plot in a single year. a and e:  
764 Distribution of the experimental (orange) and various real-world plots with 95% confidence ellipses  
765 (variables scaled for PCA) for each subset. b and f: PCA factor loadings for community properties  
766 (arrows proportionally increased to improve visibility; see Supporting Information, Table S13 and S14  
767 for PCA factor loadings and the full dataset, respectively). c and g: Two-dimensional representation of  
768 three-dimensional convex hull volumes for experimental (orange) and combined real-world  
769 communities (German real world and Jena real-world plots for the German, Fertilization 1 and 2 plots  
770 for the US comparison, gray) and their intersection (shaded area). d and h: Number and proportion  
771 (strong versus light color) of biodiversity experiment plots in the intersection, where each plot with at  
772 least one annual community in the intersection is defined as included.

34

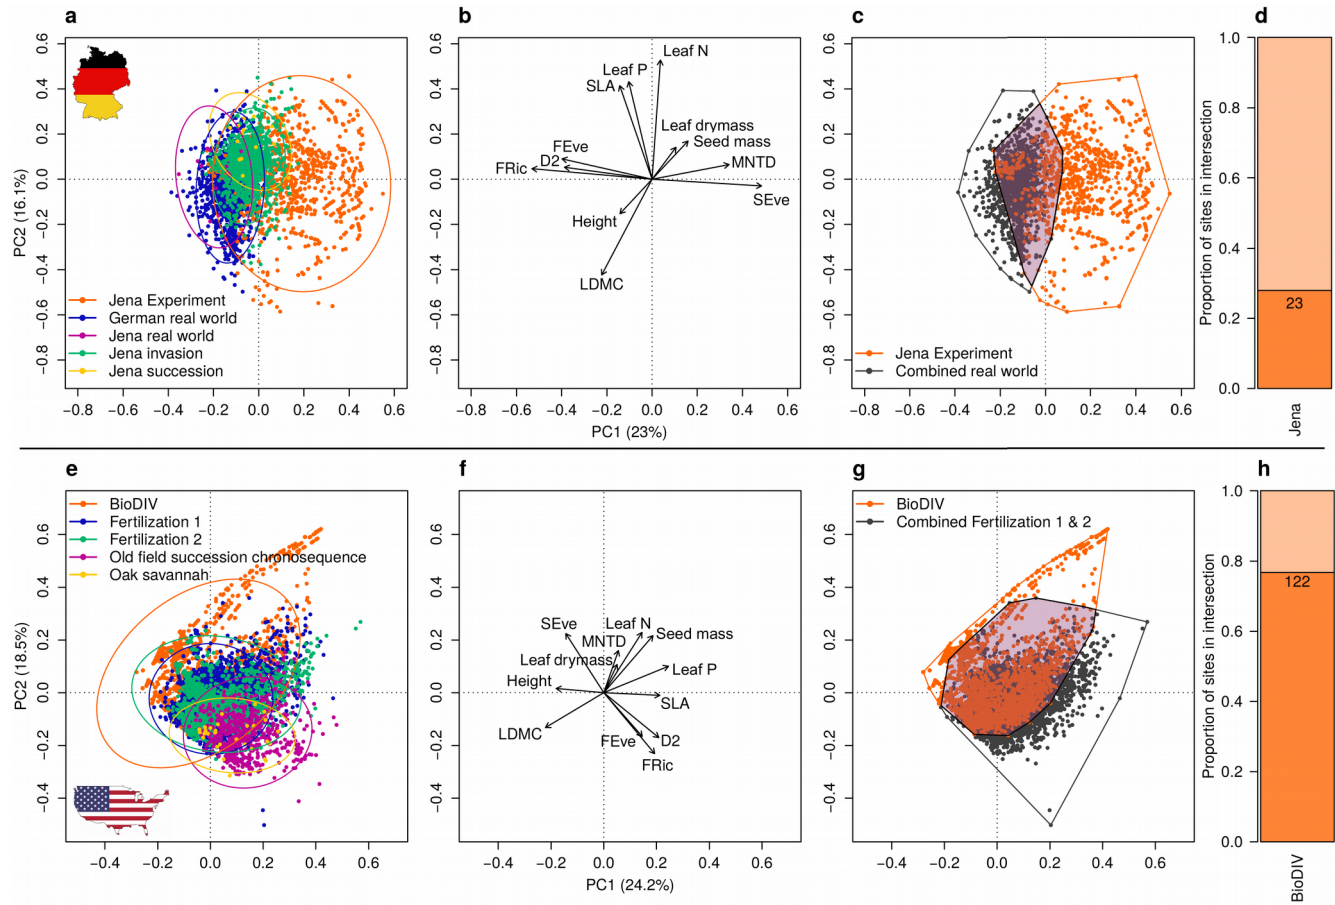

35

774 **Fig. 2 Biodiversity-ecosystem functioning relationships.** Relationship between realized target plant  
775 species richness (averaged per plot between 2006 and 2015, axis on  $\log_2$ -scale) and various ecosystem  
776 functions in German (panels a-h, Jena Experiment) and US (panels i-l, BioDIV) biodiversity  
777 experiments containing all plots (all dots and red lines) and only realistic plots (black dots and lines).  
778 Constrained (realistic plots only) and unconstrained slopes are shown for each panel together with 95%  
779 confidence intervals (error bars and shaded areas). For model parameters such as sample sizes, slope  
780 estimates, confidence intervals, p-values and adjusted  $R^2$  values, see Supporting Information, Table S8.  
781 Dashed regression lines show non-significant relationships ( $p > 0.05$ ). Note that panels a-d and i-l show  
782 the same ecosystem functions for both experiments (organic versus total C in c and k). BM denotes  
783 biomass and CN denotes C:N ratios. Where indicated in the y-axis label, data were transformed to meet  
784 model assumptions. Response variables were averaged over all available years. Function symbols  
785 modified from originals by Hamish, Saeful Muslim, Alice Noir, Lluís Pareras, Creative Stall, Atif  
786 Arshad, Made and amantaka from the Noun Project.

787



36

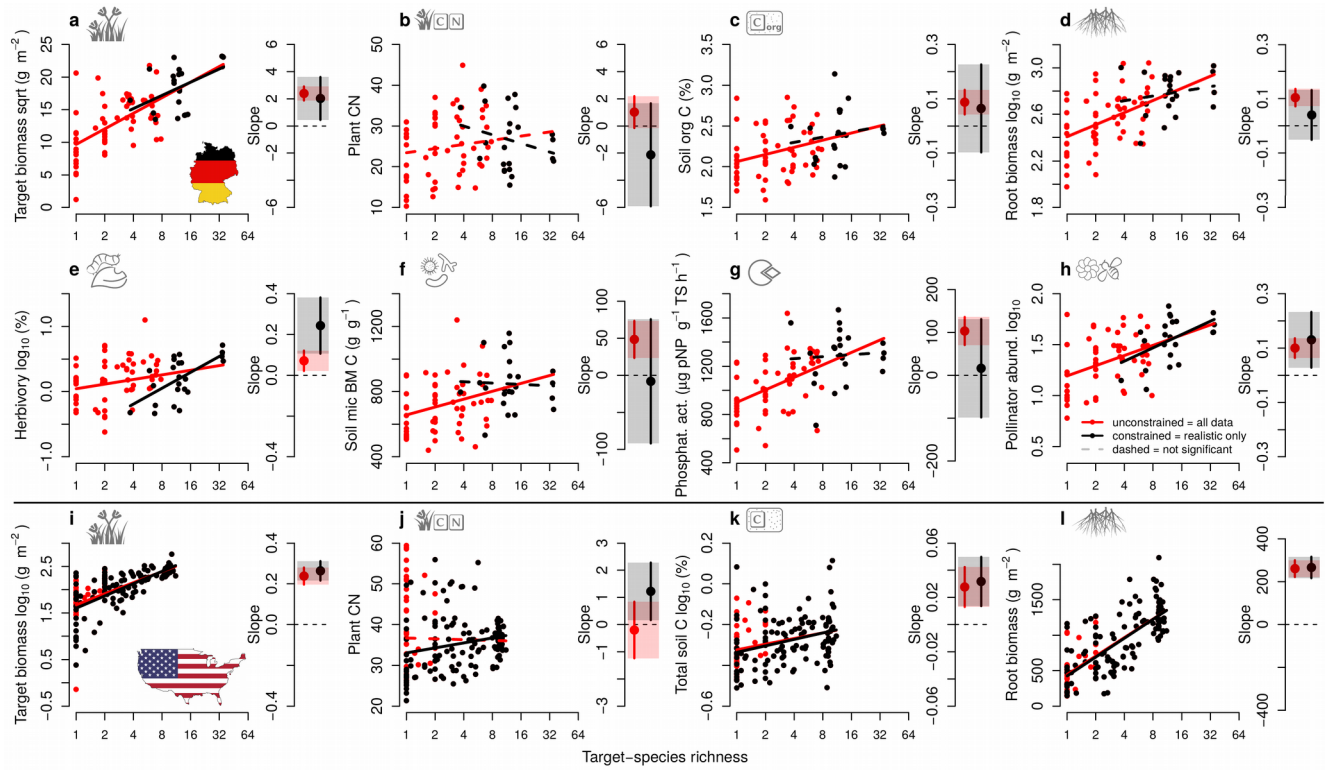



37

## 789 **Supporting Information**

790 The following Supporting Information is available for this article online:

### 791 **Supporting Methods.**

792 **Table S1.** List of German and US datasets for vegetation and ecosystem function data.

793 **Figure S1.** Temporal movement of Jena invasion plots into the real-world realm.

794 **Figure S2.** Violin plots of community properties of German experimental and real-world plots.

795 **Table S2.** T-test results for differences between German experimental and real-world plots.

796 **Figure S3.** Violin plots of community properties of US experimental and real-world plots.

797 **Table S3.** T-test results for differences between US experimental and real-world plots.

798 **Figure S4.** Alternative versions of Fig. 1 based on the alternative intersection scenarios.

799 **Figure S5.** Venn diagrams of intersection scenarios.

800 **Table S4.** Jena plots included in the different overlap scenarios versus all experimental plots.

801 **Table S5.** e120 plots included in the different overlap scenarios versus all experimental plots.

802 **Figure S6.** Boxplots of community properties of realistic and unrealistic plots for the Jena Experiment.

803 **Table S6.** T-test results for differences between realistic and unrealistic plots for the Jena Experiment.

804 **Figure S7.** Boxplots of community properties of realistic and unrealistic plots for BioDIV.

805 **Table S7.** T-test results for differences between realistic and unrealistic plots for BioDIV.

806 **Table S8.** Model parameters for BEF relationships presented in Fig. 2.

807 **Figure S8.** Alternative versions of Fig. 2 based on the alternative intersection scenarios.

808 **Table S9.** Constraining-related change in functioning at maximum species richness.

809 **Figure S9:** Random selection sensitivity analysis for Fig. 2 relationships turning insignificant.

810 **Table S10.** Differences between range in function covered by unconstrained and constrained models in

811 Fig. 2.

812 **Table S11.** Correlation coefficients for CWM's versus functional, phylogenetic metrics and evenness,

38

813 German dataset.

814 **Table S12.** Correlation coefficients for CWM's versus functional, phylogenetic metrics and evenness,

815 US dataset.

816 **Table S13.** PCA scores for full 12 community properties on PCA's in Fig. 1.

817 **Table S14.** Full dataset of community properties for all plots used in the PCA's over all years

818 (submitted along with R-code at first submission).

819 **Figure S10.** Cover versus vegetation survey size scaling sensitivity check for German real-world data

820 (Biodiversity Exploratories).

821 **Figure S11.** Phylogenetic backbone tree (one example of the 50 replicates).

822 **Table S15.** TRY references for plant species trait data from two TRY requests (might have to be

823 included in the main references depending on the TRY rules and journal policy).

824 **Figure S12.** PCA of plant species and their traits for German and US comparison.

825 **Table S16.** Species with altered trait values to avoid Gower dissimilarity zeros.

826 **Table S17.** Correlation coefficients for 21 plant community properties for the German dataset.

827 **Table S18.** Correlation coefficients for 21 plant community properties for the US dataset.

1

1 **Supporting Information** for Jochum et al. submission entitled

2 “The results of biodiversity-ecosystem functioning experiments are realistic”

3

4 **Supporting Methods**

5 **1. Details of ecosystem function measurement in the Jena Experiment and BioDIV**

6 **Jena and BioDIV plant aboveground biomass** In Jena, aboveground plant biomass was harvested bi-  
7 annually (late May and late August), just prior to mowing. Here, we used only the first harvest, which  
8 represents peak standing biomass in most years, from years 2006–2015. All vegetation was clipped at 3  
9 cm above ground in up to four rectangles of 0.2 m × 0.5 m per plot with the location of these rectangles  
10 being randomly assigned each year. For BioDIV, aboveground peak plant biomass was harvested  
11 annually in August by clipping 0.1 m × 6 m strips (see above) each year from 2006–2015. For both  
12 studies, harvested target-species biomass was sorted into individual species, dried to constant weight at  
13 70 °C for at least 48 h and weighed. Target plant community biomass was then calculated as the sum of  
14 the biomass of the individual sown species (g m<sup>-2</sup>).

15

16 **Jena and BioDIV aboveground plant biomass C:N ratio** In Jena, the combined target species  
17 material from the spring biomass harvest (May) was shredded (Analysenmühle, Kinematica, Littau,  
18 Switzerland). A subsample of the shredded material was milled to fine powder in a ball-mill (mixer mill  
19 MM2000 Retsch, Haan, Germany) and 5–10 mg was used for CN analysis with an elemental analyzer.  
20 C and N content were calculated as percentage elemental concentration of dry material and C:N ratios  
21 as the ratio between those percentages for years 2007-2012.

22 In BioDIV, two strips of 0.1 m × 6 m were clipped, typically in late July or early August with  
23 clip strip locations rotated each year. Unsorted biomass was air-dried at 40 °C. Dried biomass samples  
24 were ground (standard Thomas Wiley mill) and the resulting sample homogenized. A sub-sample was

2  
25 re-ground in a Wiley Mini-Mill, stored in glass scintillation vials and re-dried prior to lab analysis.  
26 Percent C and N content in dry matter were determined using an elemental analyzer (NA1500, Carlo-  
27 Erba Instruments or ECS 4010, COSTECH Analytical Technologies Inc., Valencia, CA, USA) at  
28 University of Minnesota or at the Ecosystems Analysis Lab, University of Nebraska, Lincoln. Ratios of  
29 dry mass elemental content were then calculated from these results for year 2006.

30  
31 **BioDIV total soil C** Total soil C samples were taken at all BioDIV plots during summer 2006 at 0–20  
32 cm depth on nine sites per plot<sup>1</sup>. Samples were sieved to remove roots, combined for each plot, mixed  
33 and ground. Subsequently, soil samples were dried at 40 °C for 5 days. For each plot, two soil samples  
34 were analysed for total C by combustion and gas chromatography (Costech Analytical ECS 4010  
35 instrument, Costech Analytical Technologies Inc., Valencia, CA). We used the average of the two  
36 measurements of C in % total carbon of dry weight.

37  
38 **Jena soil organic C** Soil organic C in the Jena “main” experiment was determined in 2008, 2011 and  
39 2014. Using a split-tube sampler (4.8 cm diameter), three soil cores per plot were taken to a depth of 30  
40 cm<sup>2</sup>. Soil cores were segmented into 5 cm depth sections and pooled per depth sections and plot. Soil  
41 was then dried, sieved and milled. Subsequently, total C was determined by combustion with an  
42 elemental analyzer at 1,150 °C (Elementaranalysator vario Max CN, Elementar Analysensysteme  
43 GmbH, Hanau, Germany). Inorganic C concentration was measured after oxidative removal of organic  
44 C for 16 h at 450 °C in a muffle furnace. Finally, organic C concentration was calculated as the  
45 difference between total and inorganic C for each 5-cm-layer<sup>2</sup> and we averaged over the two uppermost  
46 layers to get organic C content for 0–10 cm depth. Subsequently, we averaged over the three samples to  
47 get soil organic C content per year and plot in g kg<sup>-1</sup> soil.

48

3

49 **Jena and BioDIV root biomass** In Jena, standing root biomass was sampled down to 40 cm depth in  
50 all plots in June 2011 and 2014. On each plot, three cores of 3.5 cm diameter were taken and  
51 immediately stored at 4 °C until further handling. The total sample was washed to determine root  
52 biomass. Bulk samples were carefully washed by hand over a sieve of 0.5 mm mesh size. Remaining  
53 soil particles and stones were removed with tweezers. Roots were dried at 60–70 °C and weighed  
54 subsequently<sup>3</sup>. Unit: g m<sup>-2</sup>

55 In BioDIV, root biomass was sampled in 2010 after aboveground biomass clipping by collecting  
56 three 5 cm diameter × 30 cm depth cores per clipped strip<sup>1</sup>. Roots were washed free of soil, sorted from  
57 other organic material, dried and weighed. Unit: g m<sup>-2</sup>

58

59 **Jena herbivory rate** In Jena, invertebrate herbivory rates were assessed as proportional damage for  
60 every plant species × plot-combination. Herbivory rates of individual plant species were used to  
61 calculate community herbivory rates based on four different types of invertebrate herbivory: chewing,  
62 rasping, sap sucking and leaf mining. Samples of the Jena biomass harvest were used after sorting to  
63 species. For a maximum of 20 randomly chosen leaves per plant species, damage area was estimated in  
64 mm<sup>2</sup> as total value of the four damage types and total leaf area of every leaf was measured with an area  
65 meter (LI-3000C Area Meter equipped with a LI3050C transparent belt conveyor accessory, LI-COR  
66 Biosciences, Lincoln, USA). For details on the methods used see<sup>4</sup>. Here, we used percentage herbivory  
67 of the target species community from the late harvest, as this was available for three years from 2010–  
68 2012. Unit: % damage

69

70 **Jena soil microbial biomass C** Soil sampling and measurement of basal and substrate-induced  
71 microbial respiration with an oxygen-consumption apparatus was done on each plot in September  
72 2010<sup>5</sup>. Oxygen consumption of soil microorganisms in a fresh-soil equivalent to 3.5 g dry weight was

4  
73 measured at 22 °C. Substrate-induced respiration was determined by adding D-glucose to saturate  
74 catabolic enzymes of microorganisms according to preliminary studies (4 mg g<sup>-1</sup> dry soil solved in 400  
75 µl deionized water; <sup>6,7</sup>). Maximum initial respiratory response (µl O<sub>2</sub> g<sup>-1</sup> dry soil h<sup>-1</sup>) was calculated as  
76 mean of the lowest three oxygen consumption values within the first 10 h after glucose addition.  
77 Microbial biomass C (µg C g<sup>-1</sup> dry soil) was calculated as 38 × maximum initial respiratory response as  
78 suggested by preliminary studies<sup>8</sup>. Previous work has shown that the 2010 microbial biomass data are  
79 representative for long-term plant diversity effects<sup>7</sup>.

80  
81 **Jena phosphatase activity** Nine soil cores (diam. 2 cm, 0–5 cm depth) were combined to one  
82 composite sample per plot to assess phosphatase activity in 2013<sup>9</sup>. Because of the alkaline pH of the  
83 soil, we measured alkaline phosphomonoesterase activity (phosphatase activity) according to the assay  
84 by <sup>10</sup>. For each soil sample, one replicate and one blank value were included. One gram of field moist  
85 soil was mixed with toluene, modified universal buffer (MUB) and p-nitrophenylphosphate (pNP), and  
86 incubated at 37 °C for 1 hour. Subsequently, we added CaCl<sub>2</sub> and NaOH. To blanks pNP was added  
87 after incubation. The solution was filtered through P-free filters (MN 619 G ¼, Macherey-Nagel GmbH  
88 & Co. KG, Düren, Germany). Directly after filtration, pNP concentrations [µg ml<sup>-1</sup>] were measured at  
89 400 nm with a spectrophotometer (PU 8675 VIS spectrophotometer, Philips GmbH, Hamburg,  
90 Germany). The soil moisture was determined gravimetrically, i.e. by weighing before and after drying  
91 at 105 °C to convert phosphatase activities to dry matter (µg pNP g<sup>-1</sup> DM h<sup>-1</sup>).

92  
93 **Jena pollinator abundance** In 2010 and 2012, hymenopterans were sampled by suction sampling  
94 using a modified commercial vacuum cleaner (Kärcher A2500, Kärcher GmbH, Winnenden, Germany).  
95 In each year, within each plot, two random subplots of 0.75 m x 0.75 m were chosen, covered with a  
96 gauze-coated cage of the same size, and arthropods within cages were sampled. The sampling was

5

97 carried out between 9 a.m. and 4 p.m. within two 4-day sampling periods. The overall abundance of  
98 hymenopterans across the two samples per plot was used as a proxy of pollinator abundance and thus  
99 potential for pollination on each plot in the respective year. Unit: number of individuals

100

## 101 **2. Processing TRY and other plant-trait data to generate species-level values**

102 For each of the geographical species subsets, TRY trait data were processed separately following a  
103 standardized protocol: i) Removal of duplicate observations (e.g. duplicate entries of leaf mass from the  
104 same individual). ii) Removal of non-open data and removal of data obtained from outside the  
105 respective target continents. iii) Calculation of outliers for each trait-species combination (trait mean  
106  $\pm 1.96$  SD as outlier definition). iv) Removal of observations with TRY ErrorRisk  $> 4$ . v) Averaging  
107 over trait-species values per TRY dataset. vi) Removal of TRY datasets with more than 5% of values  
108 identified as outliers. vii) Averaging over trait-species mean values of the remaining datasets. For the  
109 US species, TRY data was combined with additional trait data collected in naturally occurring  
110 polycultures at Cedar Creek (personal communication with J.A. Catford<sup>11</sup>, P.B. Reich, J. Cavender-  
111 Bares). Such Cedar Creek trait averages per dataset were included into the averaging process at step v).  
112 Finally, trait values of synonyms and accepted species names were averaged and assigned to the  
113 accepted plant-species names where necessary.

6

114 **Table S1.** List of German and US datasets for vegetation and ecosystem function data.  
 115 Ideally, lists project name, main reference, short name used in this paper, number of sites we used,  
 116 years we have vegetation data for, functions we used including years. Most of the data is openly  
 117 available in various online repositories (except for data from recent years that are, in some cases, still  
 118 covered by project-specific embargo periods): Jena Experiment ([http://www.the-jena-](http://www.the-jena-experiment.de/Data.html)  
 119 [experiment.de/Data.html](http://www.the-jena-experiment.de/Data.html)), Biodiversity Exploratories ([https://www.bexis.uni-](https://www.bexis.uni-jena.de/Login/Account.aspx)  
 120 [jena.de/Login/Account.aspx](https://www.bexis.uni-jena.de/Login/Account.aspx)), Cedar Creek (<https://www.cedarcreek.umn.edu/research/data>). Data from  
 121 the Saale grasslands (Jena real world) was provided by Christiane Roscher and is currently not openly  
 122 available.

| Country | Project name                  | Project code                        | Main reference   | Number of sites used | Vegetation data years                    | Ecosystem functions & years                                                                                                                                                                                                                 |
|---------|-------------------------------|-------------------------------------|------------------|----------------------|------------------------------------------|---------------------------------------------------------------------------------------------------------------------------------------------------------------------------------------------------------------------------------------------|
| G       | Jena Experiment               | Jena Experiment                     | <sup>14</sup>    | 82                   | 2003-2015                                | plant aboveground biomass (2006-15), plant CN (2007-12), soil organic C (2008, 2011, 2014), root biomass (2011, 2014), herbivory (2010-12), soil microbial biomass C (2010), phosphatase activity (2013), pollinator abundance (2010, 2012) |
| G       | Biodiversity Exploratories    | German real world                   | <sup>15</sup>    | 150                  | 2008-2015                                | NA                                                                                                                                                                                                                                          |
| G       | Saale grasslands              | Jena real world                     | Roscher unpubl.  | 14                   | 2011                                     | NA                                                                                                                                                                                                                                          |
| G       | Jena invasion sub-experiments | Jena invasion                       | <sup>16,17</sup> | 82                   | 2003-2015                                | NA                                                                                                                                                                                                                                          |
| G       | Jena mown succession plots    | Jena succession                     | <sup>16</sup>    | 2                    | 2003-2009                                | NA                                                                                                                                                                                                                                          |
| U       | e120                          | BioDIV                              | <sup>18</sup>    | 159                  | 1996-2015 (not 2009)                     | plant aboveground biomass (2006-15, not 2009), plant CN (2006), total soil C (2006), root biomass (2010)                                                                                                                                    |
| U       | e001                          | Fertilization 1                     | <sup>19</sup>    | 207                  | 1982-2004                                | NA                                                                                                                                                                                                                                          |
| U       | e002                          | Fertilization 2                     | <sup>19</sup>    | 162                  | 1982-1991                                | NA                                                                                                                                                                                                                                          |
| U       | e014                          | Old field succession chronosequence | <sup>12</sup>    | 23                   | 1983, 1989, 1994, 1997, 2002, 2006, 2011 | NA                                                                                                                                                                                                                                          |
| U       | e093                          | Oak savannah                        | <sup>11,13</sup> | 30                   | 1991                                     | NA                                                                                                                                                                                                                                          |

123



7  
124

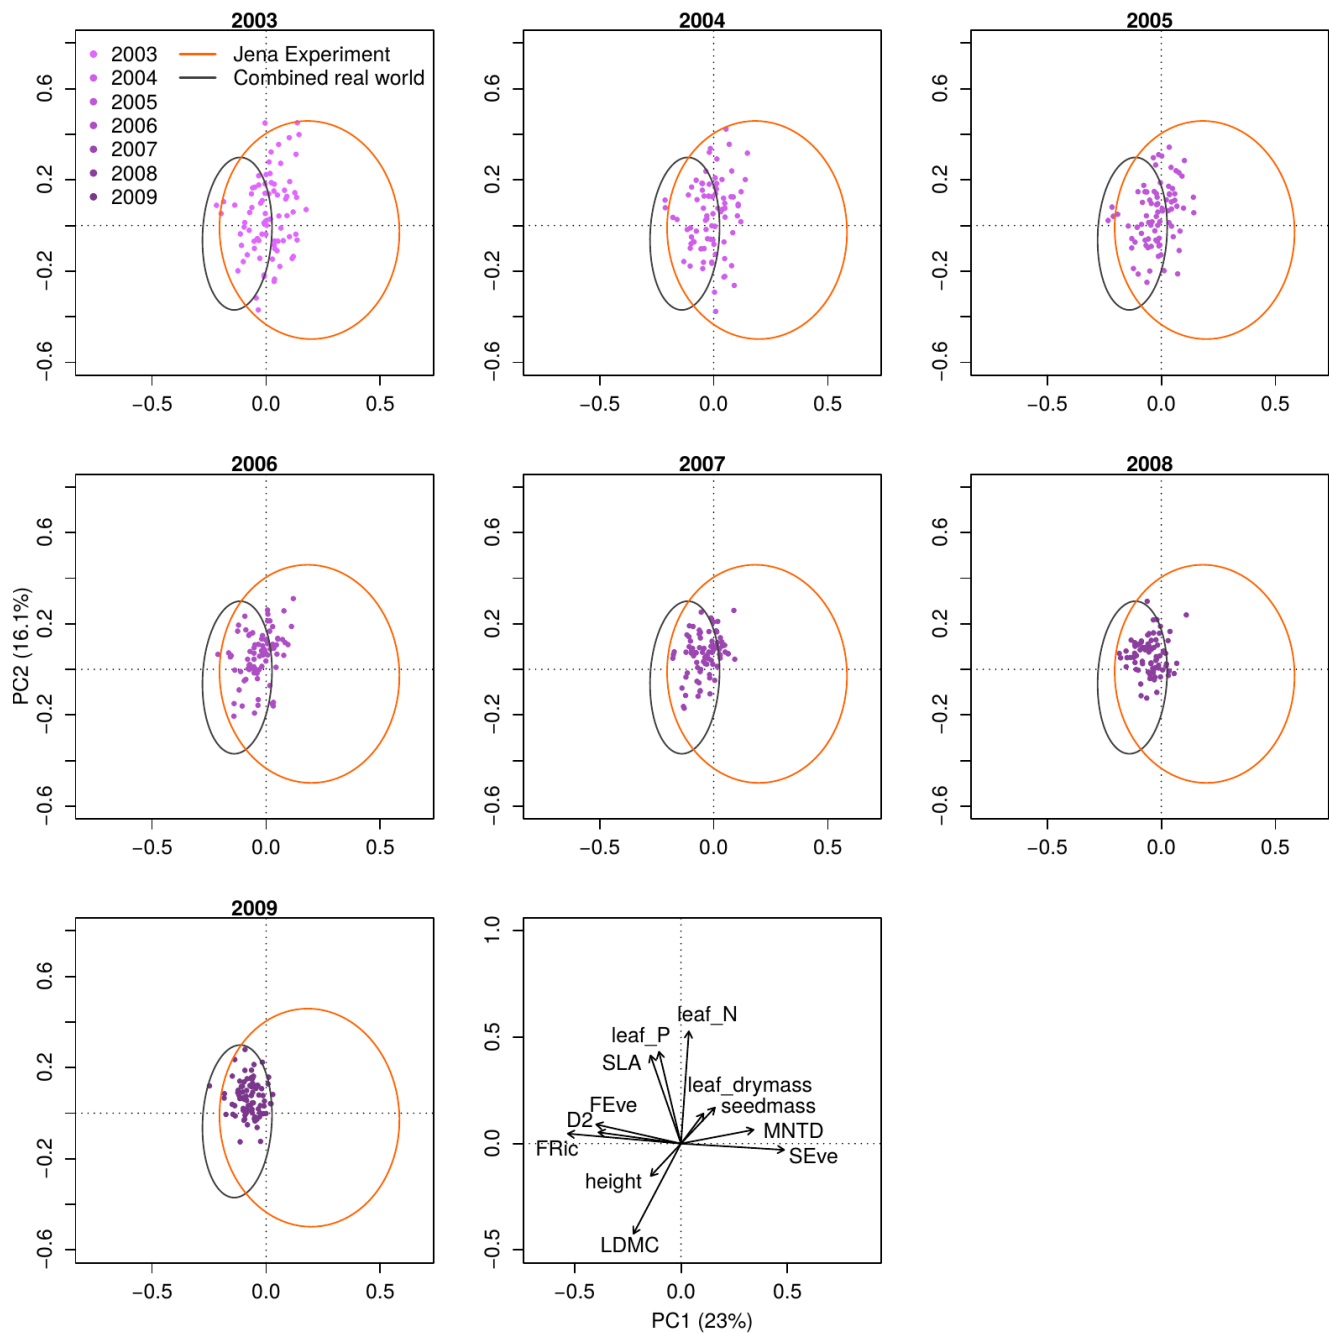

125  
126  
127  
128  
129  
130  
131  
132  
133  
134

**Figure S1.** Temporal movement of Jena invasion plots into the real-world realm.

Based on the PCA in Fig. 1a. Different shades of purple show Jena invasion plots across the years from 2003-2009. Orange and gray ellipses show 95% confidence intervals for Jena Experiment and combined real-world plots, respectively. Note that while the points in different panels are from single years, the ellipses are fixed to the across-year comparison in Fig. 1a. The last panel shows the PCA factor loadings for the full 12 community properties (arrows scaled to improve visibility). Within six years of succession, the plant communities of Jena invasion plots fully “moved” into the core of the community property space defined by the combined real-world plots (German real world and Jena real world, respectively).

8

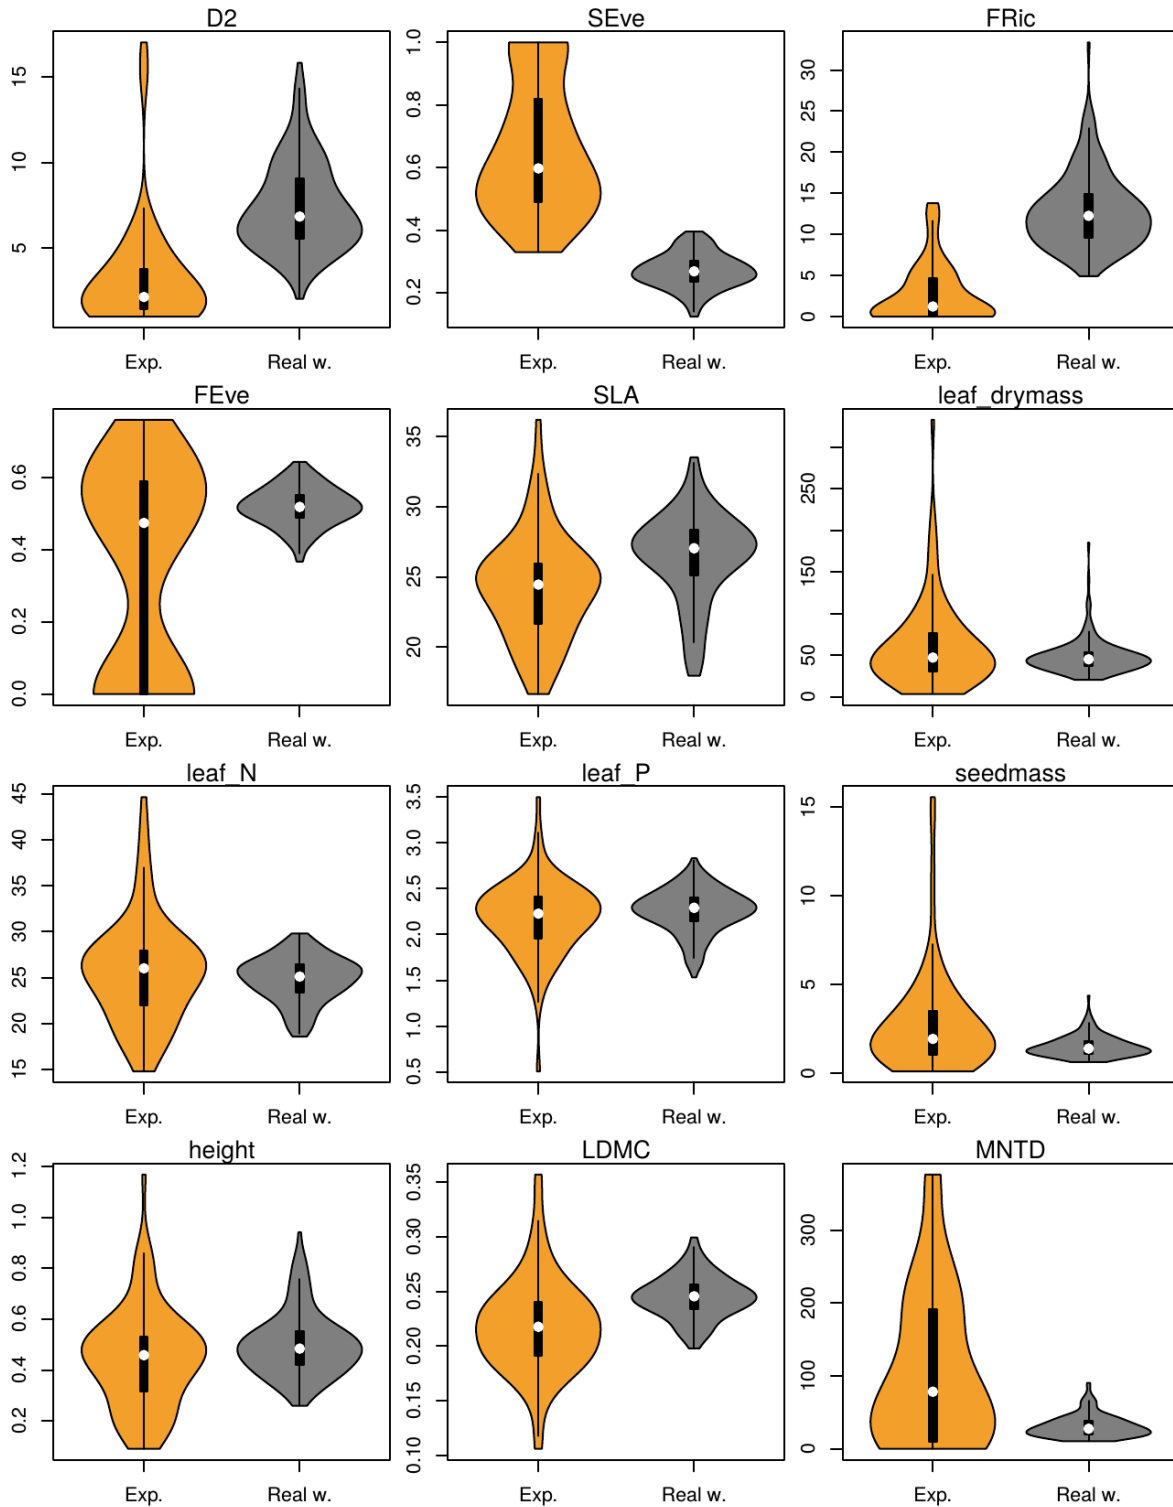

135  
136 **Figure S2.** Violin plots of community properties of German experimental and real-world plots.  
137 Combination of boxplot and rotated kernel density plot (R package “vioplot”<sup>20</sup>). Jena Experiment  
138 (orange) and combined real-world properties (German real world, Jena real world, gray) averaged  
139 across all years per plot.

9

140 **Table S2.** T-test results for differences between German experimental and real-world plots.  
141 Welsh t-tests with unequal variances. Full set of 12 community properties averaged across all years per  
142 plot for Jena Experiment (82 plots) and combined real-world data (German real world: 150 plots, Jena  
143 real world: 14 plots). T-statistic, degrees of freedom (df), experimental (Exp) data mean and real world  
144 (RW) data mean are rounded to two, p-values to 5 decimal places.

145

| model        | t_statistic | df     | mean_Exp | mean_RW | p_value |
|--------------|-------------|--------|----------|---------|---------|
| D2           | -10.17      | 133.06 | 3.23     | 7.42    | 0       |
| SEve         | 16.35       | 86.69  | 0.65     | 0.27    | 0       |
| FRic         | -19.04      | 192.57 | 2.74     | 12.84   | 0       |
| FEve         | -5.57       | 83.98  | 0.34     | 0.52    | 0       |
| SLA          | -4.54       | 140.03 | 24.26    | 26.44   | 0.00001 |
| leaf_drymass | 2.12        | 93.49  | 61.03    | 48.28   | 0.03662 |
| leaf_N       | 1.31        | 96.71  | 25.66    | 24.81   | 0.19315 |
| leaf_P       | -1.44       | 109.38 | 2.19     | 2.26    | 0.15242 |
| seedmass     | 3.95        | 84.7   | 2.76     | 1.52    | 0.00016 |
| height       | -2.36       | 115.5  | 0.45     | 0.5     | 0.01988 |
| LDMC         | -5.27       | 98.28  | 0.22     | 0.25    | 0       |
| MNTD         | 6.62        | 82.65  | 109.29   | 31.2    | 0       |

146

10

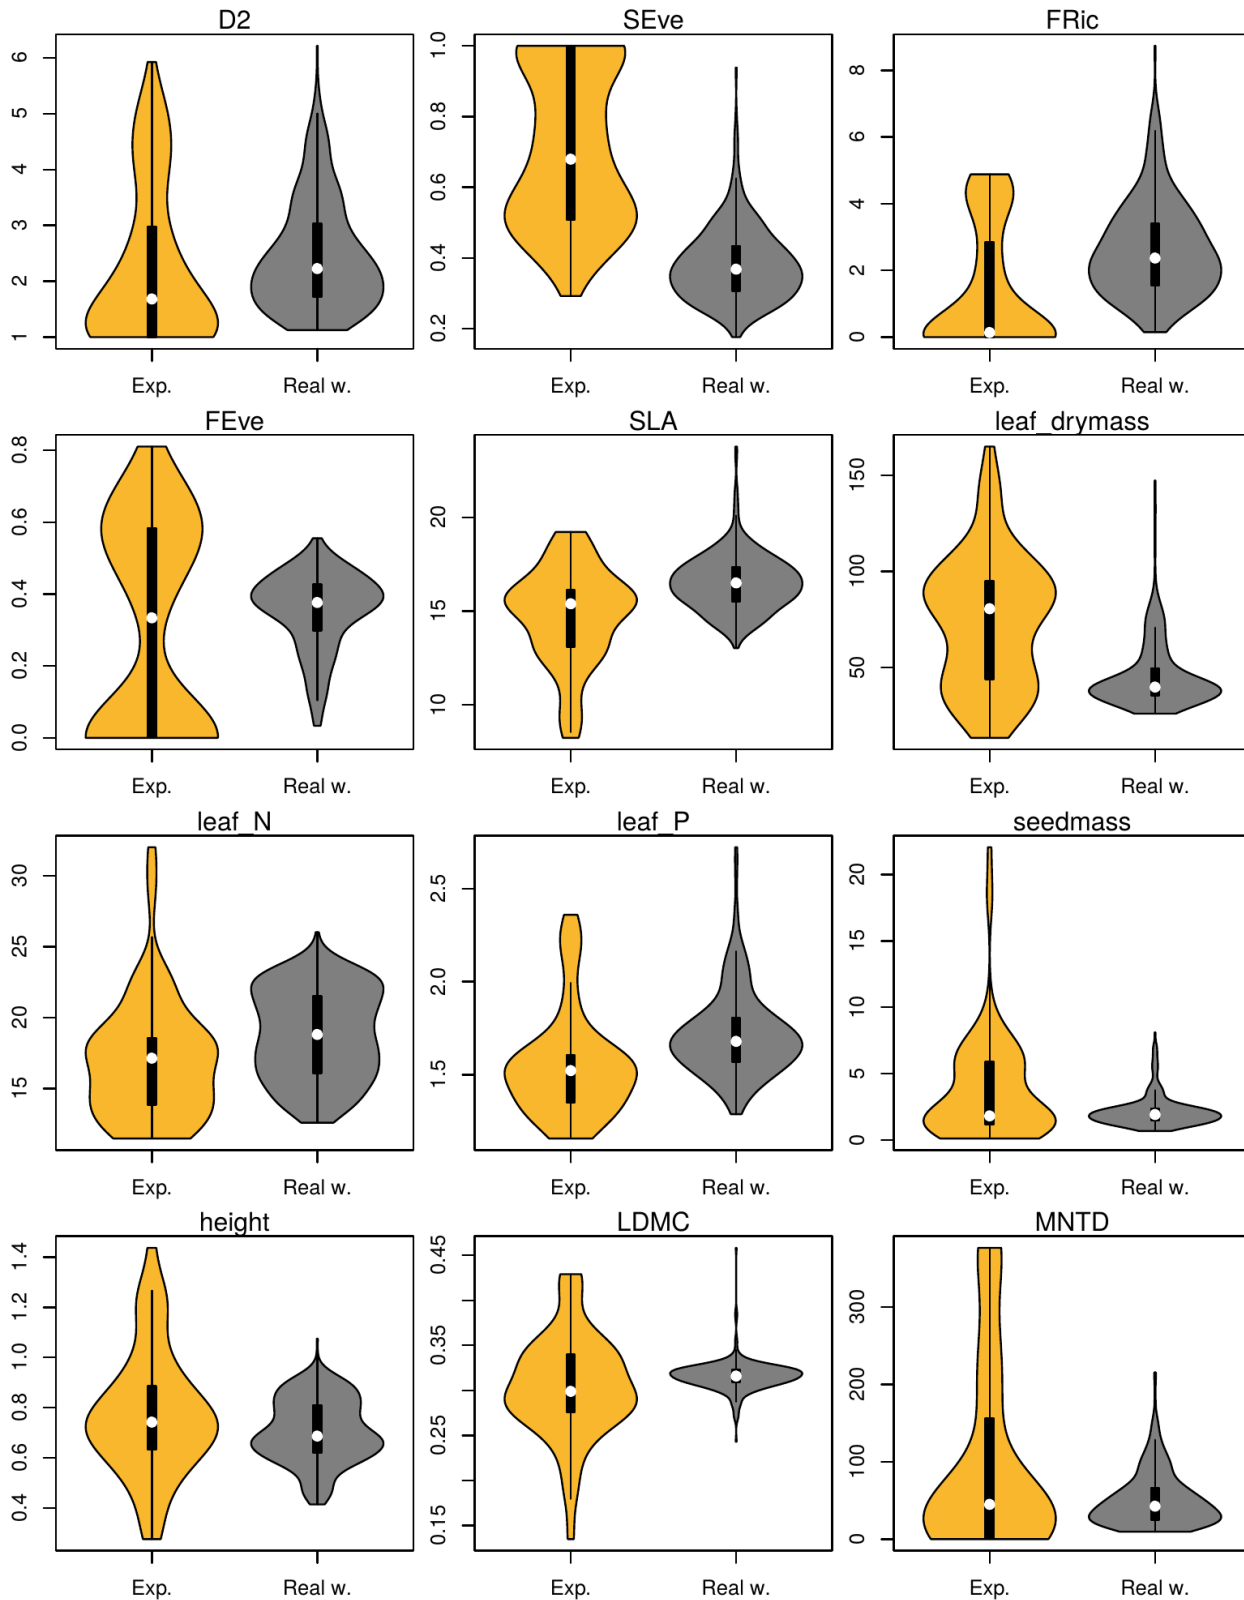

147

148 **Figure S3.** Violin plots of community properties of US experimental and real-world plots.

149 Combination of boxplot and rotated kernel density plot (R package “vioplot”<sup>20</sup>). BioDIV (orange) and

150 combined real-world data (Fertilization 1 & 2, gray) averaged across all years per plot.

11

151 **Table S3.** T-test results for differences between US experimental and real-world plots.  
152 Welsh t-tests with unequal variances. Full set of 12 community properties averaged across all years per  
153 plot for BioDIV (159 plots) and combined real-world data (Nutrient 1 & 2; 207 and 162 plots,  
154 respectively). T-statistic, degrees of freedom (df), experimental (Exp) data mean and real world (RW)  
155 data mean are rounded to two, p-values to 5 decimal places.

156

| model        | t_statistic | df     | mean_Exp | mean_RW | p_value |
|--------------|-------------|--------|----------|---------|---------|
| D2           | -1.83       | 226.06 | 2.23     | 2.46    | 0.06831 |
| SEve         | 18.02       | 188.98 | 0.71     | 0.38    | 0       |
| FRic         | -7.59       | 243.07 | 1.4      | 2.62    | 0       |
| FEve         | -2.73       | 176.06 | 0.29     | 0.35    | 0.00693 |
| SLA          | -8.01       | 204.34 | 14.77    | 16.5    | 0       |
| leaf_drymass | 10          | 193.36 | 74.23    | 45.67   | 0       |
| leaf_N       | -4.9        | 237.85 | 16.97    | 18.77   | 0       |
| leaf_P       | -6.68       | 248.46 | 1.55     | 1.71    | 0       |
| seedmass     | 5.21        | 169.51 | 3.88     | 2.18    | 0       |
| height       | 3.37        | 193.75 | 0.77     | 0.7     | 0.0009  |
| LDMC         | -2.57       | 169.1  | 0.3      | 0.32    | 0.01105 |
| MNTD         | 4.71        | 169.23 | 97.1     | 50.95   | 0.00001 |

157

12

158 **Figure S4.** Alternative versions of Fig. 1 based on the alternative intersection scenarios.  
 159 6 Versions: One for each geographical dataset per community property subset, combining all three  
 160 methods. Panels a & b: PCA and factor loadings; c & d: 3D convex hull volume, e & f: 3D  
 161 hypervolume, g & h: 2D ellipse  
 162 German Full 12 (three methods):

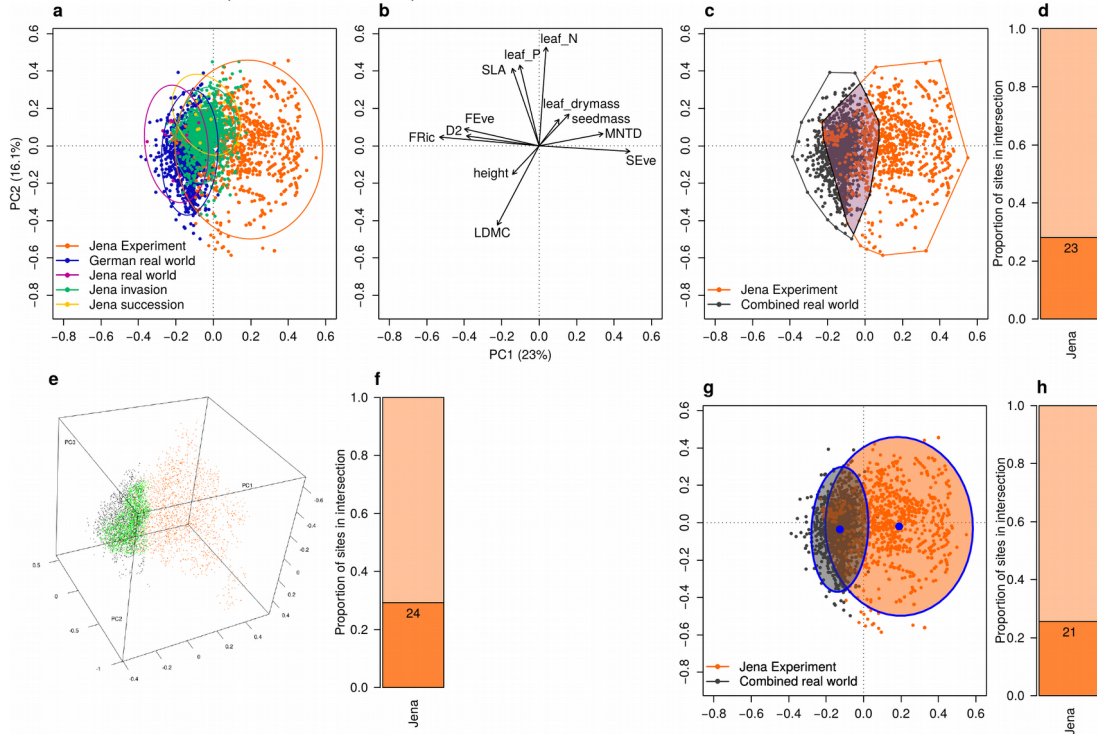

163

164 US Full 12 (three methods):

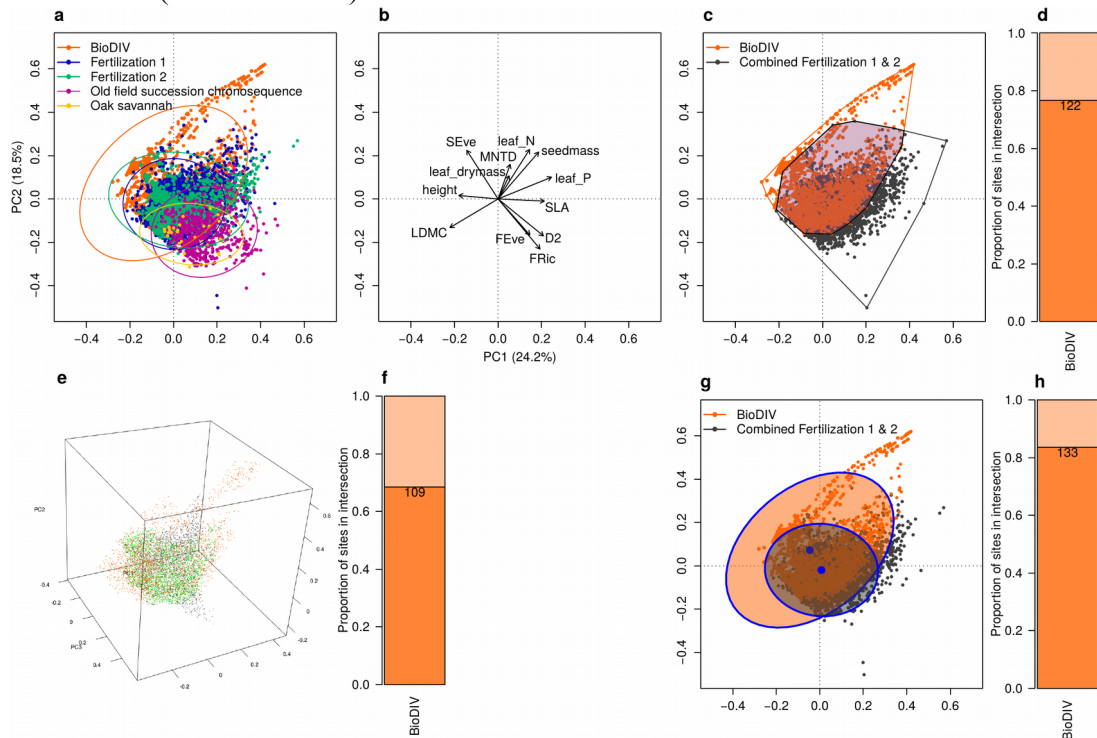

165

166

13  
167 German CWM 8 (three methods):

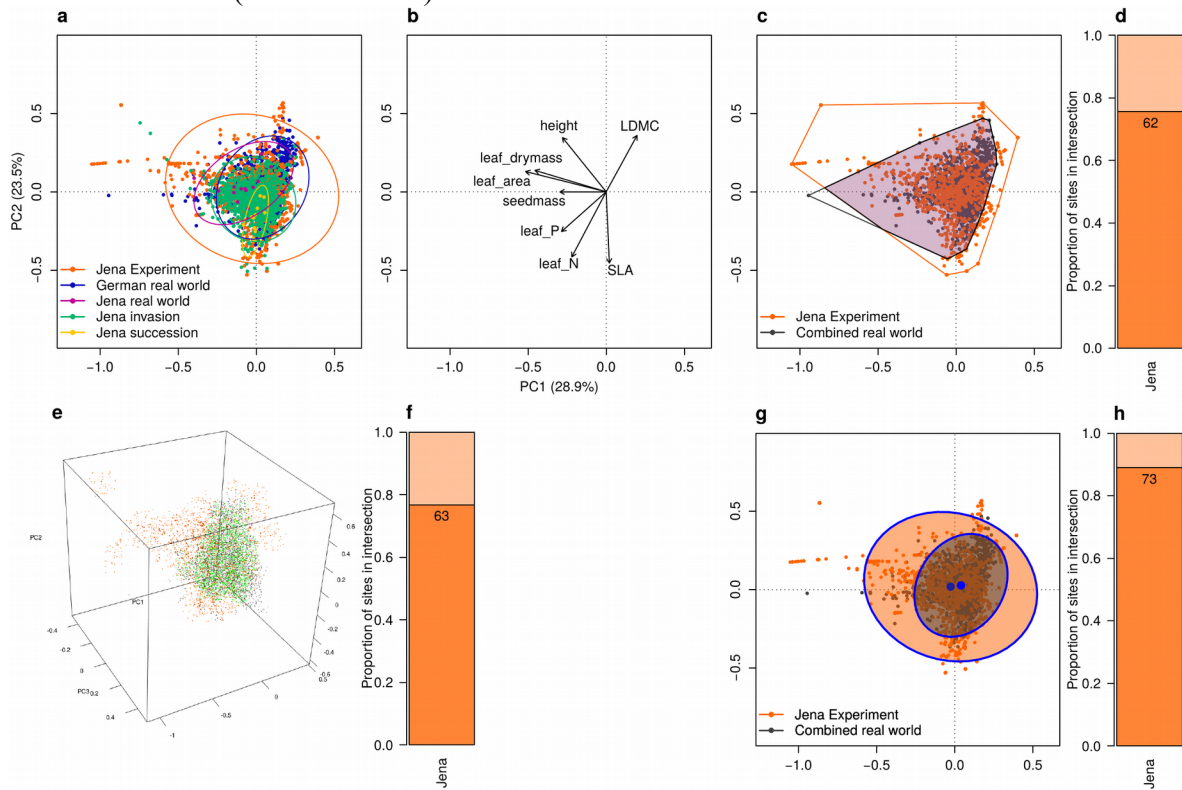

168  
169 US CWM 8 (three methods):

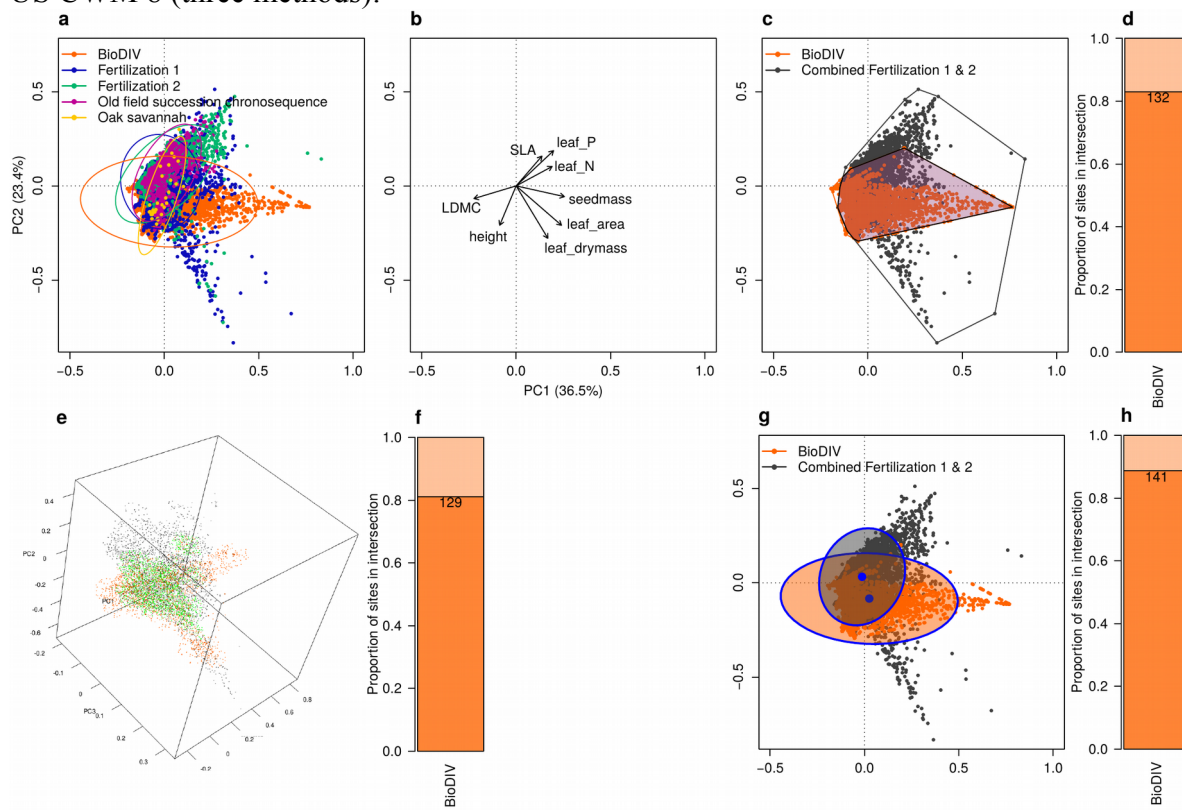

170  
171  
172  
173



14  
174 German Fun 4 (three methods):

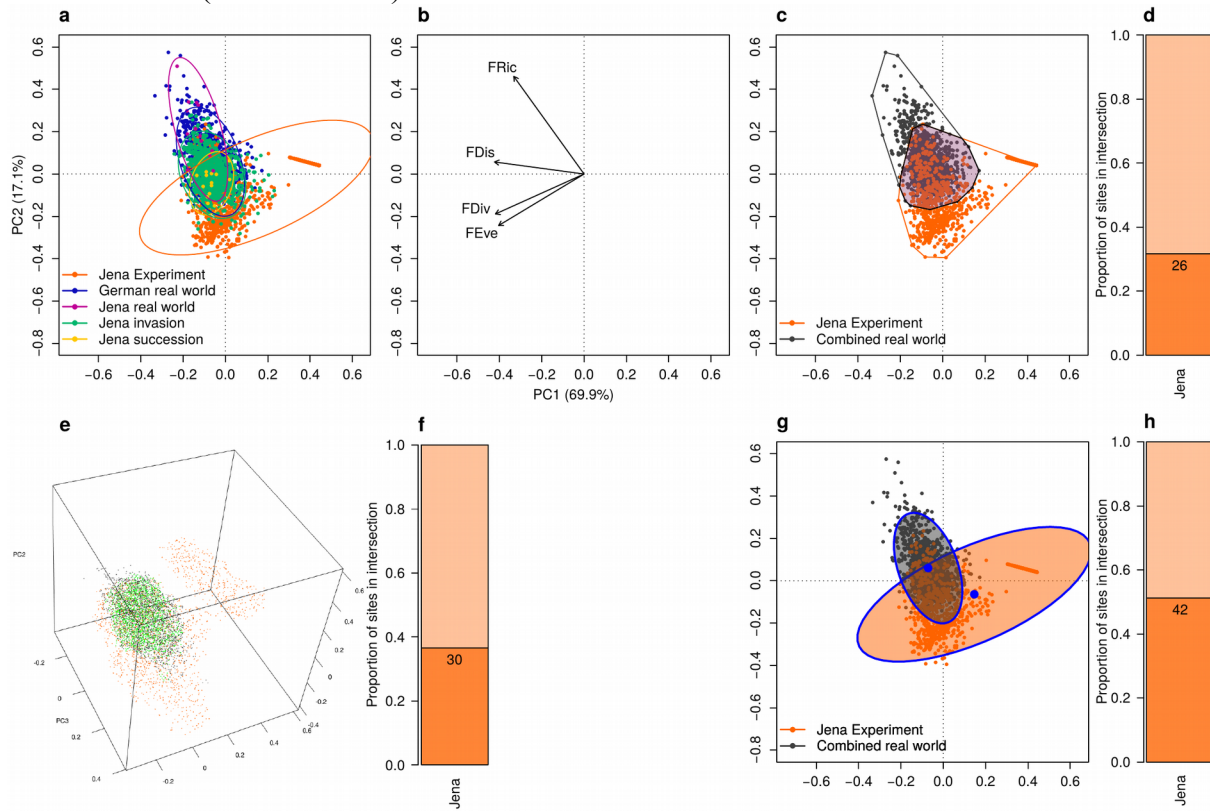

175  
176 US Fun 4 (three methods):

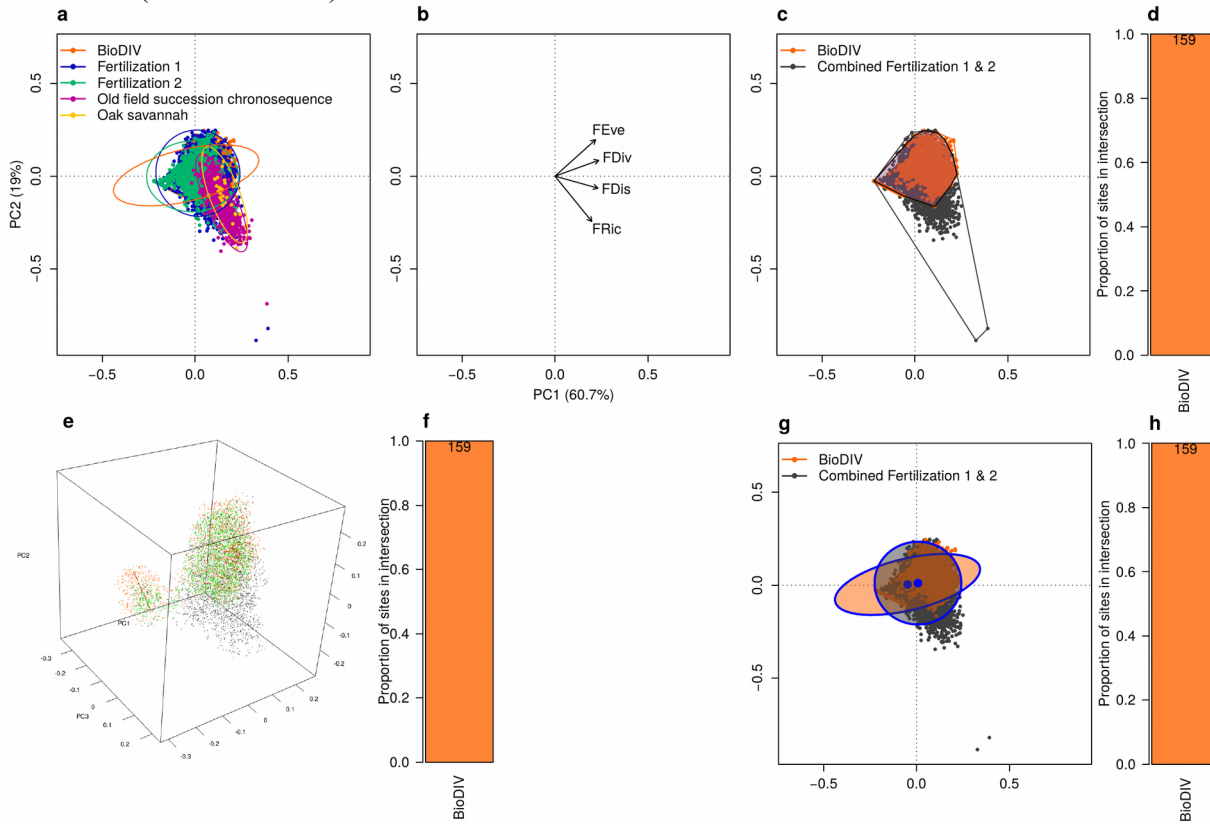

177



15

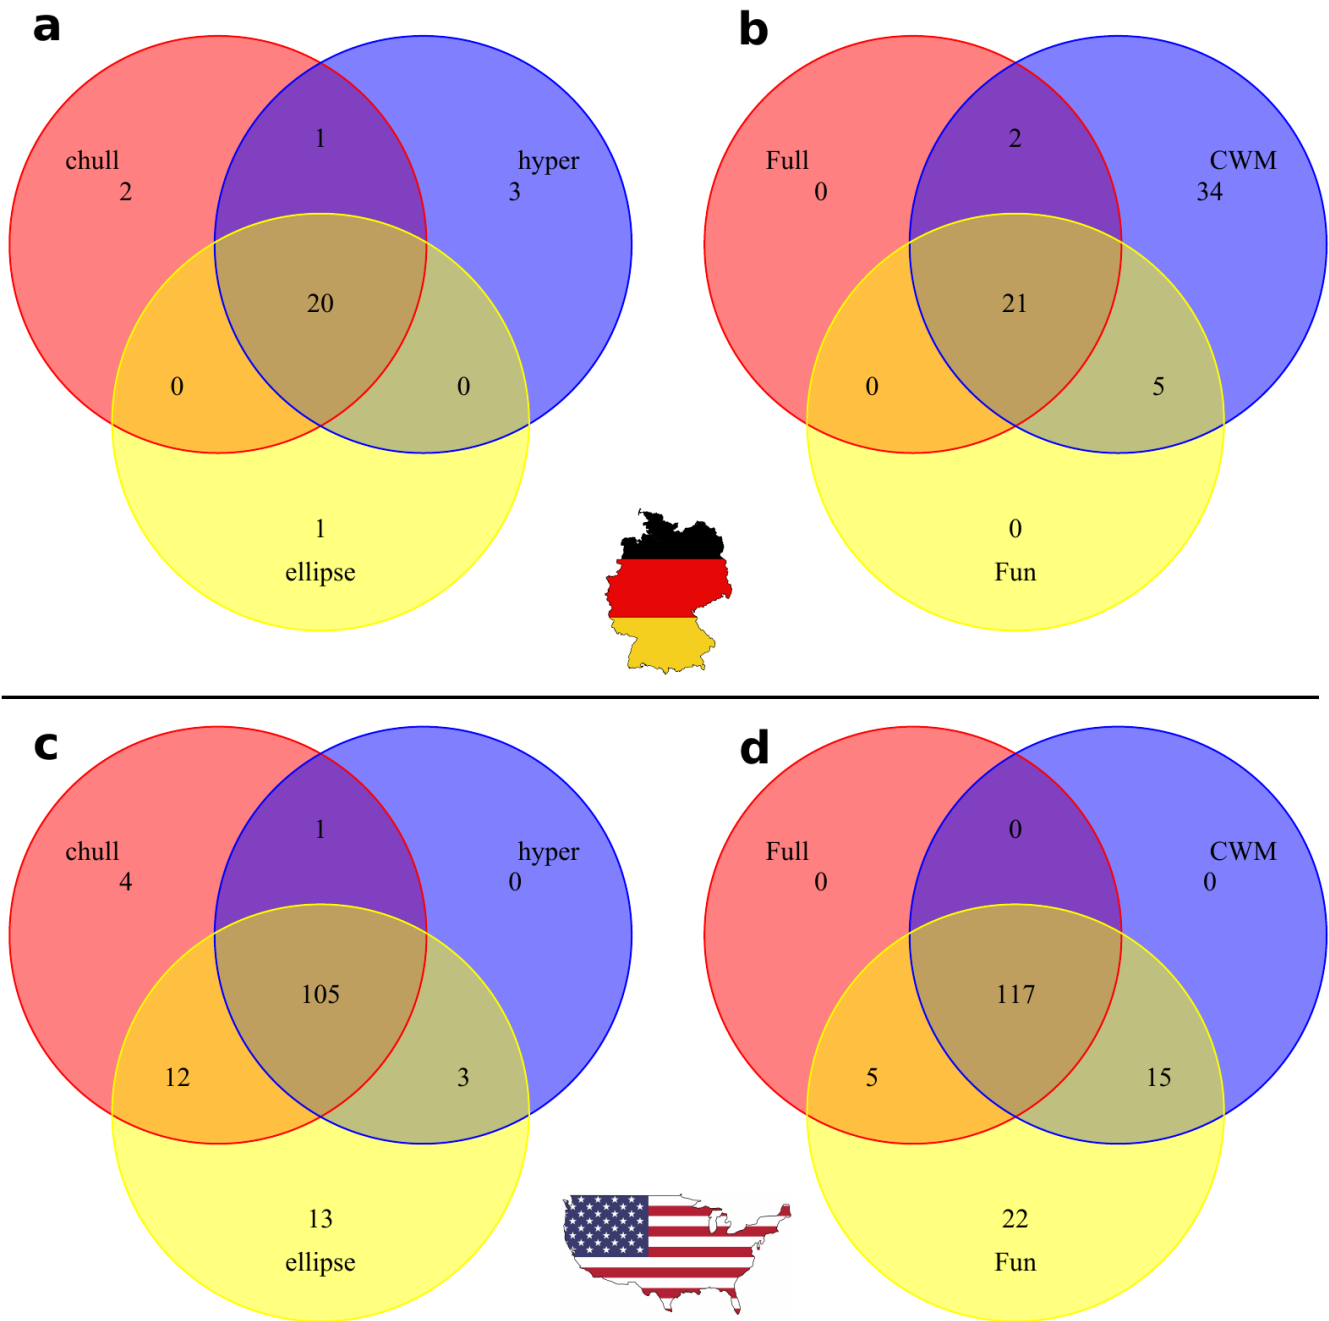

178

179 **Figure S5.** Venn diagrams illustrating overlap between plots defined as realistic for the Jena  
 180 Experiment (upper row) and BioDIV (lower row) based on three different methods of calculating  
 181 intersections (a and c) and three different subsets of community properties entering the PCA's (b and  
 182 d). a and c show three different methods for the PCA, all based on the full set of 12 properties. b and d  
 183 show three different subsets based on just the convex hull method. Abbreviations: chull=convex hull  
 184 volume approach, hyper= hypervolume approach, ellipse=confidence ellipse approach, Full=all 12  
 185 community properties, CWM=just the eight community weighted mean traits, Fun=just the four  
 186 functional diversity properties. Diagrams were created with R package "VennDiagram"<sup>21</sup>.

16

187 **Table S4.** Jena Experiment plots with their sown diversity (sown\_div), number of functional groups  
 188 (num\_fg) and their selection as realistic plots (1) based on three different methods of calculating the  
 189 intersection and based on three different subsets of community properties entering the PCA's. Methods:  
 190 Intersection of three-dimensional convex hull volumes (chull), hypervolumes (hyper) and 95%  
 191 confidence ellipses (ellipse). Subsets: Full (all 12 community properties), CWM (8 community  
 192 weighted means) and Fun (4 functional diversity metrics). Additionally, the number of realistic plots  
 193 (sum) and the percentage (per) of realistic plots from the overall number of plots (82) are given for  
 194 each combination of methodology and community property subset. Plots are sorted by sown diversity  
 195 levels.

196

| plot  | sown_div | num_fg | chull |     |     | hyper |     |     | ellipse |     |     |
|-------|----------|--------|-------|-----|-----|-------|-----|-----|---------|-----|-----|
|       |          |        | Full  | CWM | Fun | Full  | CWM | Fun | Full    | CWM | Fun |
| B1A22 | 60       | 4      | 1     | 1   | 1   | 1     | 1   | 1   | 1       | 1   | 1   |
| B2A03 | 60       | 4      | 1     | 1   | 1   | 1     | 1   | 1   | 1       | 1   | 1   |
| B3A14 | 60       | 4      | 1     | 1   | 1   | 1     | 1   | 1   | 1       | 1   | 1   |
| B4A01 | 60       | 4      | 1     | 1   | 1   | 1     | 1   | 1   | 1       | 1   | 1   |
| B1A01 | 16       | 4      | 1     | 1   | 1   | 1     | 1   | 1   | 1       | 1   | 1   |
| B1A06 | 16       | 2      | 1     | 1   | 1   | 1     | 1   | 1   | 1       | 1   | 1   |
| B1A11 | 16       | 1      | 1     | 1   | 1   | 1     | 1   | 1   | 1       | 1   | 1   |
| B1A20 | 16       | 3      | 1     | 1   | 1   | 0     | 1   | 1   | 0       | 1   | 1   |
| B2A10 | 16       | 2      | 1     | 1   | 1   | 1     | 1   | 1   | 1       | 1   | 1   |
| B2A18 | 16       | 4      | 1     | 1   | 1   | 1     | 1   | 1   | 1       | 1   | 1   |
| B2A22 | 16       | 3      | 1     | 1   | 1   | 1     | 1   | 1   | 1       | 1   | 1   |
| B3A09 | 16       | 1      | 1     | 1   | 1   | 1     | 1   | 1   | 1       | 1   | 1   |
| B3A16 | 16       | 2      | 1     | 1   | 1   | 0     | 1   | 1   | 0       | 1   | 1   |
| B3A22 | 16       | 4      | 1     | 1   | 1   | 1     | 1   | 1   | 1       | 1   | 1   |
| B3A24 | 16       | 3      | 1     | 1   | 1   | 1     | 1   | 1   | 1       | 1   | 1   |
| B4A02 | 16       | 3      | 1     | 1   | 1   | 1     | 1   | 1   | 1       | 1   | 1   |
| B4A18 | 16       | 4      | 1     | 1   | 1   | 1     | 1   | 1   | 1       | 1   | 1   |
| B4A20 | 16       | 2      | 1     | 1   | 1   | 1     | 1   | 1   | 1       | 1   | 1   |
| B1A02 | 8        | 2      | 1     | 1   | 1   | 1     | 1   | 1   | 1       | 1   | 1   |
| B1A03 | 8        | 3      | 0     | 1   | 0   | 1     | 1   | 0   | 0       | 1   | 1   |
| B1A12 | 8        | 1      | 0     | 1   | 0   | 0     | 1   | 0   | 0       | 1   | 1   |
| B1A14 | 8        | 4      | 0     | 1   | 1   | 1     | 1   | 1   | 0       | 1   | 1   |
| B2A12 | 8        | 1      | 0     | 1   | 1   | 0     | 0   | 1   | 0       | 1   | 1   |
| B2A14 | 8        | 4      | 0     | 1   | 0   | 0     | 1   | 0   | 0       | 1   | 1   |
| B2A17 | 8        | 2      | 0     | 1   | 0   | 0     | 1   | 0   | 0       | 1   | 1   |
| B2A21 | 8        | 3      | 0     | 1   | 0   | 0     | 1   | 0   | 0       | 1   | 1   |
| B3A04 | 8        | 1      | 1     | 1   | 0   | 1     | 1   | 0   | 1       | 1   | 1   |
| B3A05 | 8        | 3      | 1     | 1   | 1   | 1     | 1   | 1   | 1       | 1   | 1   |
| B3A07 | 8        | 4      | 0     | 1   | 0   | 0     | 1   | 1   | 0       | 1   | 1   |
| B3A20 | 8        | 2      | 0     | 1   | 1   | 0     | 1   | 1   | 0       | 1   | 1   |
| B4A06 | 8        | 1      | 0     | 0   | 0   | 0     | 0   | 0   | 0       | 1   | 0   |
| B4A08 | 8        | 2      | 0     | 1   | 0   | 1     | 1   | 0   | 0       | 1   | 1   |
| B4A10 | 8        | 3      | 0     | 1   | 1   | 0     | 1   | 1   | 0       | 1   | 1   |

17

|       |   |   |   |   |   |   |   |   |   |   |   |
|-------|---|---|---|---|---|---|---|---|---|---|---|
| B4A16 | 8 | 4 | 1 | 1 | 1 | 1 | 1 | 1 | 0 | 1 | 1 |
| B1A04 | 4 | 4 | 0 | 1 | 0 | 0 | 1 | 1 | 0 | 1 | 1 |
| B1A13 | 4 | 1 | 0 | 1 | 0 | 0 | 1 | 0 | 0 | 1 | 1 |
| B1A19 | 4 | 3 | 0 | 1 | 0 | 0 | 1 | 0 | 1 | 1 | 0 |
| B1A21 | 4 | 2 | 0 | 1 | 0 | 0 | 1 | 1 | 0 | 1 | 1 |
| B2A01 | 4 | 4 | 0 | 1 | 0 | 0 | 1 | 0 | 0 | 1 | 0 |
| B2A06 | 4 | 2 | 0 | 1 | 0 | 0 | 1 | 0 | 0 | 1 | 1 |
| B2A09 | 4 | 1 | 0 | 0 | 0 | 0 | 0 | 0 | 0 | 1 | 0 |
| B2A16 | 4 | 3 | 0 | 0 | 0 | 0 | 0 | 0 | 0 | 1 | 0 |
| B3A03 | 4 | 3 | 0 | 1 | 0 | 0 | 1 | 0 | 0 | 1 | 1 |
| B3A11 | 4 | 2 | 0 | 1 | 0 | 0 | 1 | 0 | 0 | 1 | 1 |
| B3A13 | 4 | 1 | 1 | 1 | 0 | 1 | 1 | 1 | 1 | 1 | 1 |
| B3A23 | 4 | 4 | 0 | 1 | 0 | 0 | 1 | 0 | 0 | 1 | 0 |
| B4A04 | 4 | 4 | 0 | 1 | 1 | 0 | 1 | 1 | 0 | 1 | 1 |
| B4A07 | 4 | 2 | 0 | 1 | 0 | 0 | 1 | 0 | 0 | 1 | 0 |
| B4A11 | 4 | 3 | 0 | 1 | 0 | 0 | 1 | 0 | 0 | 1 | 1 |
| B4A22 | 4 | 1 | 0 | 0 | 0 | 0 | 0 | 0 | 0 | 0 | 0 |
| B1A05 | 2 | 1 | 0 | 1 | 0 | 0 | 0 | 0 | 0 | 1 | 0 |
| B1A07 | 2 | 1 | 0 | 1 | 0 | 0 | 1 | 0 | 0 | 1 | 0 |
| B1A16 | 2 | 2 | 0 | 1 | 0 | 0 | 1 | 0 | 0 | 1 | 0 |
| B1A17 | 2 | 2 | 0 | 1 | 0 | 0 | 1 | 0 | 0 | 1 | 0 |
| B2A02 | 2 | 1 | 0 | 0 | 0 | 0 | 1 | 0 | 0 | 1 | 0 |
| B2A08 | 2 | 2 | 0 | 1 | 0 | 0 | 1 | 0 | 0 | 1 | 0 |
| B2A19 | 2 | 1 | 0 | 0 | 0 | 0 | 0 | 0 | 0 | 1 | 0 |
| B2A20 | 2 | 2 | 0 | 0 | 0 | 0 | 0 | 0 | 0 | 1 | 0 |
| B3A02 | 2 | 2 | 0 | 1 | 0 | 0 | 1 | 0 | 0 | 1 | 0 |
| B3A08 | 2 | 1 | 0 | 1 | 0 | 0 | 1 | 0 | 0 | 1 | 0 |
| B3A19 | 2 | 2 | 0 | 0 | 0 | 0 | 1 | 0 | 0 | 1 | 0 |
| B3A21 | 2 | 1 | 0 | 0 | 0 | 0 | 1 | 0 | 0 | 1 | 0 |
| B4A14 | 2 | 1 | 0 | 0 | 0 | 0 | 0 | 0 | 0 | 1 | 0 |
| B4A15 | 2 | 2 | 0 | 1 | 0 | 0 | 1 | 0 | 0 | 1 | 0 |
| B4A17 | 2 | 1 | 0 | 0 | 0 | 0 | 0 | 0 | 0 | 0 | 0 |
| B4A21 | 2 | 2 | 0 | 1 | 0 | 0 | 1 | 0 | 0 | 1 | 0 |
| B1A08 | 1 | 1 | 0 | 1 | 0 | 0 | 1 | 0 | 0 | 1 | 0 |
| B1A09 | 1 | 1 | 0 | 0 | 0 | 0 | 0 | 0 | 0 | 0 | 0 |
| B1A15 | 1 | 1 | 0 | 1 | 0 | 0 | 1 | 0 | 0 | 1 | 0 |
| B1A18 | 1 | 1 | 0 | 0 | 0 | 0 | 0 | 0 | 0 | 1 | 0 |
| B2A04 | 1 | 1 | 0 | 1 | 0 | 0 | 1 | 0 | 0 | 1 | 0 |
| B2A05 | 1 | 1 | 0 | 1 | 0 | 0 | 1 | 0 | 0 | 1 | 0 |
| B2A13 | 1 | 1 | 0 | 0 | 0 | 0 | 0 | 0 | 0 | 1 | 0 |
| B2A15 | 1 | 1 | 0 | 1 | 0 | 0 | 0 | 0 | 0 | 0 | 0 |
| B3A01 | 1 | 1 | 0 | 1 | 0 | 0 | 1 | 0 | 0 | 1 | 0 |
| B3A06 | 1 | 1 | 0 | 0 | 0 | 0 | 1 | 0 | 0 | 0 | 0 |
| B3A12 | 1 | 1 | 0 | 1 | 0 | 0 | 0 | 0 | 0 | 1 | 0 |

18

|       |   |   |      |      |      |      |      |      |      |      |      |
|-------|---|---|------|------|------|------|------|------|------|------|------|
| B3A17 | 1 | 1 | 0    | 0    | 0    | 0    | 1    | 0    | 0    | 1    | 0    |
| B4A03 | 1 | 1 | 0    | 0    | 0    | 0    | 0    | 0    | 0    | 0    | 0    |
| B4A09 | 1 | 1 | 0    | 0    | 0    | 0    | 0    | 0    | 0    | 0    | 0    |
| B4A12 | 1 | 1 | 0    | 0    | 0    | 0    | 0    | 0    | 0    | 0    | 0    |
| B4A13 | 1 | 1 | 0    | 0    | 0    | 0    | 0    | 0    | 0    | 0    | 0    |
| sum   |   |   | 23   | 62   | 26   | 24   | 63   | 30   | 21   | 73   | 42   |
| per   |   |   | 0.28 | 0.76 | 0.32 | 0.29 | 0.77 | 0.37 | 0.26 | 0.89 | 0.51 |

197



20

|     |    |   |   |   |   |   |   |   |   |   |   |   |
|-----|----|---|---|---|---|---|---|---|---|---|---|---|
| 339 | 16 | 5 | 1 | 1 | 1 | 1 | 1 | 1 | 1 | 1 | 1 | 1 |
| 12  | 8  | 4 | 1 | 1 | 1 | 1 | 1 | 1 | 1 | 1 | 1 | 1 |
| 15  | 8  | 4 | 1 | 1 | 1 | 1 | 1 | 1 | 1 | 1 | 1 | 1 |
| 22  | 8  | 4 | 1 | 1 | 1 | 1 | 1 | 1 | 1 | 1 | 1 | 1 |
| 50  | 8  | 4 | 1 | 1 | 1 | 1 | 1 | 1 | 1 | 1 | 1 | 1 |
| 57  | 8  | 4 | 1 | 1 | 1 | 1 | 1 | 1 | 1 | 1 | 1 | 1 |
| 67  | 8  | 5 | 1 | 1 | 1 | 1 | 1 | 1 | 1 | 1 | 1 | 1 |
| 74  | 8  | 5 | 1 | 1 | 1 | 1 | 1 | 1 | 1 | 1 | 1 | 1 |
| 81  | 8  | 4 | 1 | 1 | 1 | 1 | 1 | 1 | 1 | 1 | 1 | 1 |
| 98  | 8  | 5 | 1 | 1 | 1 | 1 | 1 | 1 | 1 | 1 | 1 | 1 |
| 104 | 8  | 5 | 1 | 1 | 1 | 1 | 1 | 1 | 1 | 1 | 1 | 1 |
| 111 | 8  | 4 | 1 | 1 | 1 | 1 | 1 | 1 | 1 | 1 | 1 | 1 |
| 115 | 8  | 4 | 1 | 1 | 1 | 1 | 1 | 1 | 1 | 1 | 1 | 1 |
| 118 | 8  | 5 | 1 | 1 | 1 | 1 | 1 | 1 | 1 | 1 | 1 | 1 |
| 130 | 8  | 5 | 1 | 1 | 1 | 1 | 1 | 1 | 1 | 1 | 1 | 1 |
| 146 | 8  | 5 | 1 | 1 | 1 | 1 | 1 | 1 | 1 | 1 | 1 | 1 |
| 170 | 8  | 4 | 1 | 1 | 1 | 1 | 1 | 1 | 1 | 1 | 1 | 1 |
| 177 | 8  | 5 | 1 | 1 | 1 | 1 | 1 | 1 | 1 | 1 | 1 | 1 |
| 178 | 8  | 3 | 1 | 1 | 1 | 1 | 1 | 1 | 1 | 1 | 1 | 1 |
| 206 | 8  | 4 | 1 | 1 | 1 | 1 | 1 | 1 | 1 | 1 | 1 | 1 |
| 208 | 8  | 4 | 1 | 1 | 1 | 1 | 1 | 1 | 1 | 1 | 1 | 1 |
| 210 | 8  | 4 | 1 | 1 | 1 | 1 | 1 | 1 | 1 | 1 | 1 | 1 |
| 213 | 8  | 5 | 1 | 1 | 1 | 1 | 1 | 1 | 1 | 1 | 1 | 1 |
| 232 | 8  | 5 | 1 | 1 | 1 | 1 | 1 | 1 | 1 | 1 | 1 | 1 |
| 266 | 8  | 5 | 1 | 1 | 1 | 1 | 1 | 1 | 1 | 1 | 1 | 1 |
| 283 | 8  | 3 | 1 | 1 | 1 | 1 | 1 | 1 | 1 | 1 | 1 | 1 |
| 292 | 8  | 3 | 1 | 1 | 1 | 1 | 1 | 1 | 1 | 1 | 1 | 1 |
| 293 | 8  | 4 | 1 | 1 | 1 | 1 | 1 | 1 | 1 | 1 | 1 | 1 |
| 303 | 8  | 3 | 1 | 1 | 1 | 1 | 1 | 1 | 1 | 1 | 1 | 1 |
| 307 | 8  | 4 | 1 | 1 | 1 | 1 | 1 | 1 | 1 | 1 | 1 | 1 |
| 313 | 8  | 4 | 1 | 1 | 1 | 1 | 1 | 1 | 1 | 1 | 1 | 1 |
| 3   | 4  | 2 | 1 | 1 | 1 | 1 | 1 | 1 | 1 | 1 | 1 | 1 |
| 24  | 4  | 3 | 1 | 1 | 1 | 1 | 1 | 1 | 1 | 1 | 1 | 1 |
| 26  | 4  | 3 | 0 | 0 | 1 | 0 | 1 | 1 | 1 | 0 | 1 | 1 |
| 28  | 4  | 2 | 1 | 1 | 1 | 1 | 1 | 1 | 1 | 1 | 1 | 1 |
| 33  | 4  | 4 | 1 | 1 | 1 | 0 | 1 | 1 | 1 | 1 | 1 | 1 |
| 44  | 4  | 3 | 1 | 1 | 1 | 0 | 0 | 1 | 1 | 1 | 1 | 1 |
| 45  | 4  | 4 | 1 | 1 | 1 | 0 | 1 | 1 | 1 | 1 | 1 | 1 |
| 53  | 4  | 4 | 1 | 1 | 1 | 0 | 1 | 1 | 1 | 1 | 1 | 1 |
| 58  | 4  | 3 | 1 | 1 | 1 | 0 | 1 | 1 | 1 | 1 | 1 | 1 |
| 62  | 4  | 3 | 1 | 1 | 1 | 1 | 1 | 1 | 1 | 1 | 1 | 1 |
| 70  | 4  | 3 | 1 | 1 | 1 | 1 | 1 | 1 | 1 | 1 | 1 | 1 |
| 93  | 4  | 2 | 1 | 1 | 1 | 0 | 0 | 1 | 0 | 1 | 1 | 1 |
| 110 | 4  | 3 | 1 | 1 | 1 | 0 | 1 | 1 | 1 | 1 | 1 | 1 |

21

|     |   |   |   |   |   |   |   |   |   |   |   |
|-----|---|---|---|---|---|---|---|---|---|---|---|
| 133 | 4 | 3 | 1 | 1 | 1 | 1 | 1 | 1 | 1 | 1 | 1 |
| 138 | 4 | 2 | 1 | 1 | 1 | 1 | 1 | 1 | 1 | 1 | 1 |
| 139 | 4 | 2 | 1 | 1 | 1 | 1 | 1 | 1 | 1 | 1 | 1 |
| 149 | 4 | 4 | 0 | 1 | 1 | 0 | 1 | 1 | 0 | 1 | 1 |
| 176 | 4 | 3 | 1 | 1 | 1 | 1 | 1 | 1 | 1 | 1 | 1 |
| 190 | 4 | 3 | 1 | 1 | 1 | 1 | 1 | 1 | 1 | 1 | 1 |
| 199 | 4 | 3 | 1 | 1 | 1 | 1 | 1 | 1 | 1 | 1 | 1 |
| 201 | 4 | 3 | 0 | 1 | 1 | 0 | 1 | 1 | 0 | 1 | 1 |
| 223 | 4 | 3 | 1 | 1 | 1 | 1 | 1 | 1 | 1 | 1 | 1 |
| 225 | 4 | 4 | 1 | 1 | 1 | 1 | 1 | 1 | 1 | 1 | 1 |
| 229 | 4 | 3 | 1 | 1 | 1 | 1 | 1 | 1 | 1 | 1 | 1 |
| 233 | 4 | 4 | 1 | 1 | 1 | 1 | 1 | 1 | 1 | 1 | 1 |
| 286 | 4 | 3 | 1 | 1 | 1 | 1 | 1 | 1 | 1 | 1 | 1 |
| 287 | 4 | 3 | 1 | 1 | 1 | 1 | 1 | 1 | 1 | 1 | 1 |
| 302 | 4 | 3 | 1 | 1 | 1 | 1 | 1 | 1 | 1 | 1 | 1 |
| 325 | 4 | 4 | 1 | 0 | 1 | 1 | 0 | 1 | 1 | 1 | 1 |
| 6   | 2 | 1 | 1 | 1 | 1 | 1 | 1 | 1 | 1 | 1 | 1 |
| 14  | 2 | 1 | 1 | 1 | 1 | 1 | 1 | 1 | 1 | 1 | 1 |
| 32  | 2 | 2 | 0 | 0 | 1 | 0 | 0 | 1 | 0 | 0 | 1 |
| 48  | 2 | 2 | 1 | 1 | 1 | 1 | 1 | 1 | 0 | 1 | 1 |
| 56  | 2 | 2 | 1 | 1 | 1 | 1 | 1 | 1 | 1 | 1 | 1 |
| 73  | 2 | 2 | 1 | 1 | 1 | 1 | 1 | 1 | 1 | 1 | 1 |
| 75  | 2 | 2 | 1 | 0 | 1 | 0 | 0 | 1 | 1 | 1 | 1 |
| 117 | 2 | 2 | 0 | 1 | 1 | 0 | 0 | 1 | 0 | 0 | 1 |
| 125 | 2 | 2 | 0 | 0 | 1 | 0 | 1 | 1 | 1 | 1 | 1 |
| 127 | 2 | 2 | 1 | 1 | 1 | 1 | 1 | 1 | 1 | 1 | 1 |
| 157 | 2 | 1 | 0 | 0 | 1 | 0 | 0 | 1 | 1 | 1 | 1 |
| 165 | 2 | 2 | 0 | 1 | 1 | 0 | 1 | 1 | 1 | 1 | 1 |
| 168 | 2 | 2 | 0 | 1 | 1 | 0 | 1 | 1 | 1 | 1 | 1 |
| 171 | 2 | 2 | 1 | 1 | 1 | 1 | 0 | 1 | 1 | 1 | 1 |
| 175 | 2 | 2 | 0 | 1 | 1 | 0 | 0 | 1 | 0 | 0 | 1 |
| 189 | 2 | 2 | 0 | 0 | 1 | 0 | 1 | 1 | 1 | 1 | 1 |
| 193 | 2 | 2 | 0 | 1 | 1 | 0 | 0 | 1 | 0 | 0 | 1 |
| 197 | 2 | 2 | 1 | 0 | 1 | 0 | 0 | 1 | 1 | 1 | 1 |
| 211 | 2 | 2 | 1 | 1 | 1 | 1 | 1 | 1 | 1 | 1 | 1 |
| 224 | 2 | 2 | 0 | 1 | 1 | 0 | 1 | 1 | 0 | 1 | 1 |
| 234 | 2 | 2 | 0 | 1 | 1 | 0 | 0 | 1 | 0 | 0 | 1 |
| 236 | 2 | 2 | 1 | 1 | 1 | 0 | 1 | 1 | 1 | 1 | 1 |
| 259 | 2 | 2 | 1 | 1 | 1 | 1 | 1 | 1 | 1 | 1 | 1 |
| 278 | 2 | 2 | 0 | 0 | 1 | 0 | 1 | 1 | 1 | 0 | 1 |
| 300 | 2 | 2 | 1 | 1 | 1 | 0 | 0 | 1 | 1 | 1 | 1 |
| 304 | 2 | 1 | 0 | 0 | 1 | 0 | 0 | 1 | 1 | 1 | 1 |
| 311 | 2 | 2 | 1 | 0 | 1 | 0 | 0 | 1 | 1 | 1 | 1 |
| 322 | 2 | 2 | 0 | 0 | 1 | 0 | 1 | 1 | 1 | 1 | 1 |

22

|     |   |   |      |      |     |      |      |     |      |      |     |   |
|-----|---|---|------|------|-----|------|------|-----|------|------|-----|---|
| 324 | 2 | 1 | 1    | 1    | 1   | 1    | 1    | 1   | 1    | 1    | 1   | 1 |
| 330 | 2 | 2 | 1    | 1    | 1   | 1    | 1    | 1   | 1    | 1    | 1   | 1 |
| 334 | 2 | 2 | 0    | 0    | 1   | 0    | 1    | 1   | 1    | 0    | 1   | 1 |
| 335 | 2 | 2 | 1    | 1    | 1   | 0    | 1    | 1   | 0    | 1    | 1   | 1 |
| 342 | 2 | 2 | 1    | 1    | 1   | 1    | 1    | 1   | 1    | 1    | 1   | 1 |
| 2   | 1 | 1 | 1    | 1    | 1   | 1    | 1    | 1   | 1    | 1    | 1   | 1 |
| 5   | 1 | 1 | 0    | 0    | 1   | 0    | 0    | 1   | 0    | 0    | 0   | 1 |
| 11  | 1 | 1 | 0    | 1    | 1   | 0    | 0    | 1   | 0    | 1    | 1   | 1 |
| 16  | 1 | 1 | 1    | 1    | 1   | 0    | 1    | 1   | 0    | 0    | 0   | 1 |
| 20  | 1 | 1 | 1    | 1    | 1   | 1    | 0    | 1   | 1    | 1    | 1   | 1 |
| 29  | 1 | 1 | 1    | 1    | 1   | 1    | 1    | 1   | 1    | 1    | 1   | 1 |
| 31  | 1 | 1 | 0    | 0    | 1   | 0    | 1    | 1   | 1    | 1    | 1   | 1 |
| 69  | 1 | 1 | 0    | 1    | 1   | 0    | 0    | 1   | 0    | 1    | 1   | 1 |
| 83  | 1 | 1 | 0    | 0    | 1   | 0    | 0    | 1   | 0    | 0    | 0   | 1 |
| 87  | 1 | 1 | 0    | 0    | 1   | 0    | 0    | 1   | 0    | 0    | 0   | 1 |
| 92  | 1 | 1 | 0    | 0    | 1   | 0    | 0    | 1   | 0    | 0    | 0   | 1 |
| 94  | 1 | 1 | 1    | 1    | 1   | 1    | 1    | 1   | 1    | 1    | 1   | 1 |
| 109 | 1 | 1 | 0    | 0    | 1   | 0    | 0    | 1   | 0    | 0    | 0   | 1 |
| 129 | 1 | 1 | 0    | 1    | 1   | 1    | 1    | 1   | 1    | 1    | 1   | 1 |
| 135 | 1 | 1 | 0    | 0    | 1   | 0    | 1    | 1   | 1    | 1    | 1   | 1 |
| 137 | 1 | 1 | 1    | 1    | 1   | 1    | 0    | 1   | 1    | 1    | 1   | 1 |
| 142 | 1 | 1 | 0    | 0    | 1   | 0    | 0    | 1   | 0    | 1    | 1   | 1 |
| 153 | 1 | 1 | 1    | 1    | 1   | 1    | 1    | 1   | 1    | 1    | 1   | 1 |
| 163 | 1 | 1 | 0    | 0    | 1   | 0    | 0    | 1   | 0    | 0    | 0   | 1 |
| 167 | 1 | 1 | 0    | 1    | 1   | 1    | 1    | 1   | 1    | 1    | 1   | 1 |
| 230 | 1 | 1 | 1    | 0    | 1   | 0    | 0    | 1   | 1    | 1    | 1   | 1 |
| 237 | 1 | 1 | 1    | 1    | 1   | 1    | 1    | 1   | 1    | 1    | 1   | 1 |
| 256 | 1 | 1 | 1    | 1    | 1   | 1    | 1    | 1   | 1    | 1    | 1   | 1 |
| 265 | 1 | 1 | 0    | 0    | 1   | 0    | 0    | 1   | 0    | 0    | 0   | 1 |
| 267 | 1 | 1 | 0    | 1    | 1   | 1    | 1    | 1   | 1    | 1    | 1   | 1 |
| 268 | 1 | 1 | 0    | 0    | 1   | 0    | 0    | 1   | 0    | 1    | 1   | 1 |
| 280 | 1 | 1 | 0    | 0    | 1   | 0    | 1    | 1   | 1    | 1    | 1   | 1 |
| 282 | 1 | 1 | 0    | 0    | 1   | 0    | 0    | 1   | 0    | 0    | 0   | 1 |
| 290 | 1 | 1 | 1    | 1    | 1   | 1    | 1    | 1   | 1    | 1    | 1   | 1 |
| 308 | 1 | 1 | 1    | 1    | 1   | 0    | 1    | 1   | 0    | 0    | 0   | 1 |
| 333 | 1 | 1 | 0    | 1    | 1   | 0    | 1    | 1   | 0    | 1    | 1   | 1 |
| 338 | 1 | 1 | 1    | 1    | 1   | 1    | 1    | 1   | 1    | 1    | 1   | 1 |
| sum |   |   | 122  | 132  | 159 | 109  | 129  | 159 | 133  | 141  | 159 |   |
| per |   |   | 0.77 | 0.83 | 1   | 0.69 | 0.81 | 1   | 0.84 | 0.89 | 1   |   |

207



23

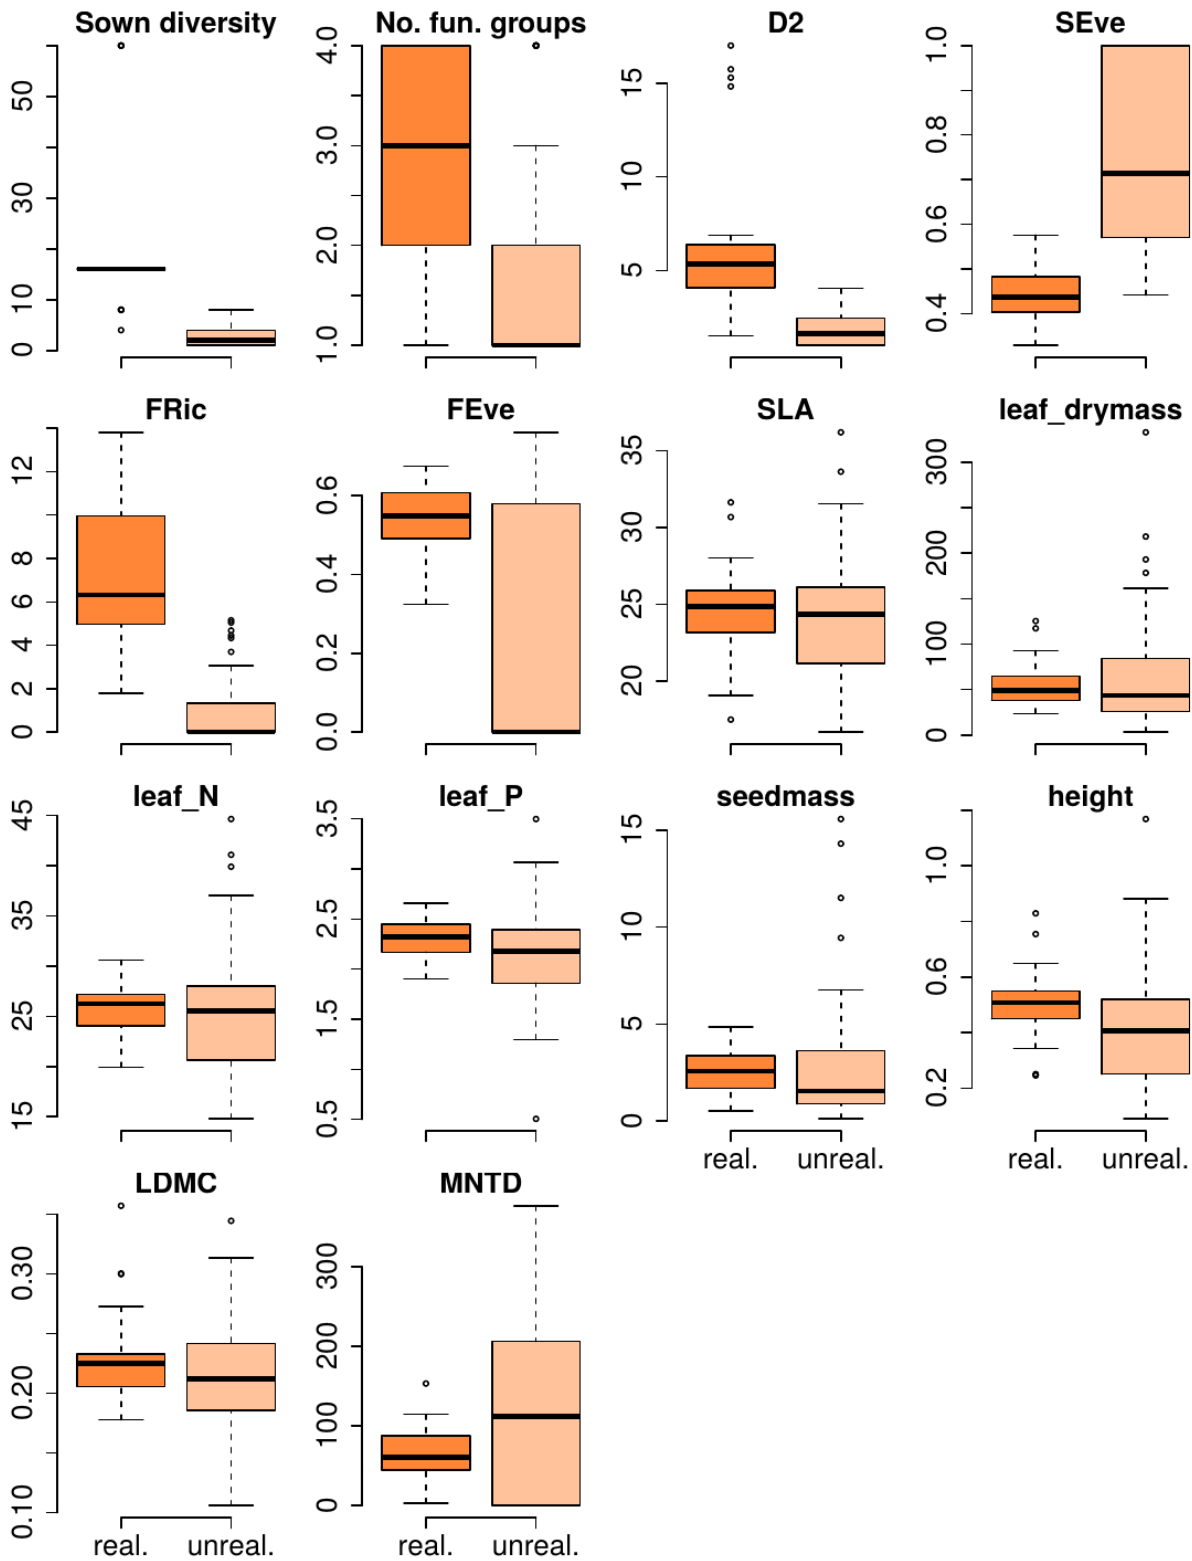

208

209 **Figure S6.** Boxplots of community properties of realistic (strong color) and unrealistic (weak color)  
210 plots for the Jena Experiment. Realistic plots were calculated based on the full set of community  
211 properties and the convex hull volume method. All properties were averaged across all available years  
212 per plot (23 realistic and 59 unrealistic plots).

24

213 **Table S6.** T-test results for differences between realistic and unrealistic plots for the Jena Experiment.  
214 Welsh t-tests with unequal variances. Realistic plots were calculated based on the full set of community  
215 properties and the convex hull volume method. All properties were averaged across all available years  
216 per plot (23 realistic and 59 unrealistic plots). T-statistic, degrees of freedom (df), means of realistic  
217 (real) and unrealistic communities (unreal) are rounded to two, p-values to four decimal places.  
218

| model        | t_statistic | df    | mean_real | mean_unreal | p_value |
|--------------|-------------|-------|-----------|-------------|---------|
| sowndiv      | 4.77        | 22.34 | 21.74     | 3.46        | 0.0001  |
| numfg        | 3.54        | 36.95 | 2.83      | 1.85        | 0.0011  |
| D2           | 5.06        | 22.72 | 6.65      | 1.9         | 0       |
| SEve         | -10.33      | 78.5  | 0.45      | 0.74        | 0       |
| FRic         | 8.25        | 24.88 | 7.32      | 0.96        | 0       |
| FEve         | 6.46        | 74.97 | 0.54      | 0.27        | 0       |
| SLA          | 0.63        | 49.5  | 24.64     | 24.11       | 0.5334  |
| leaf_drymass | -0.55       | 78.6  | 57.26     | 62.5        | 0.5845  |
| leaf_N       | 0.3         | 78.09 | 25.88     | 25.58       | 0.7679  |
| leaf_P       | 2.24        | 77.01 | 2.31      | 2.14        | 0.0281  |
| seedmass     | -0.35       | 79.48 | 2.64      | 2.81        | 0.7303  |
| height       | 1.87        | 61.58 | 0.5       | 0.42        | 0.0663  |
| LDMC         | 1.75        | 42.61 | 0.23      | 0.21        | 0.0865  |
| MNTD         | -3.56       | 77.95 | 64.82     | 126.63      | 0.0006  |

219

25

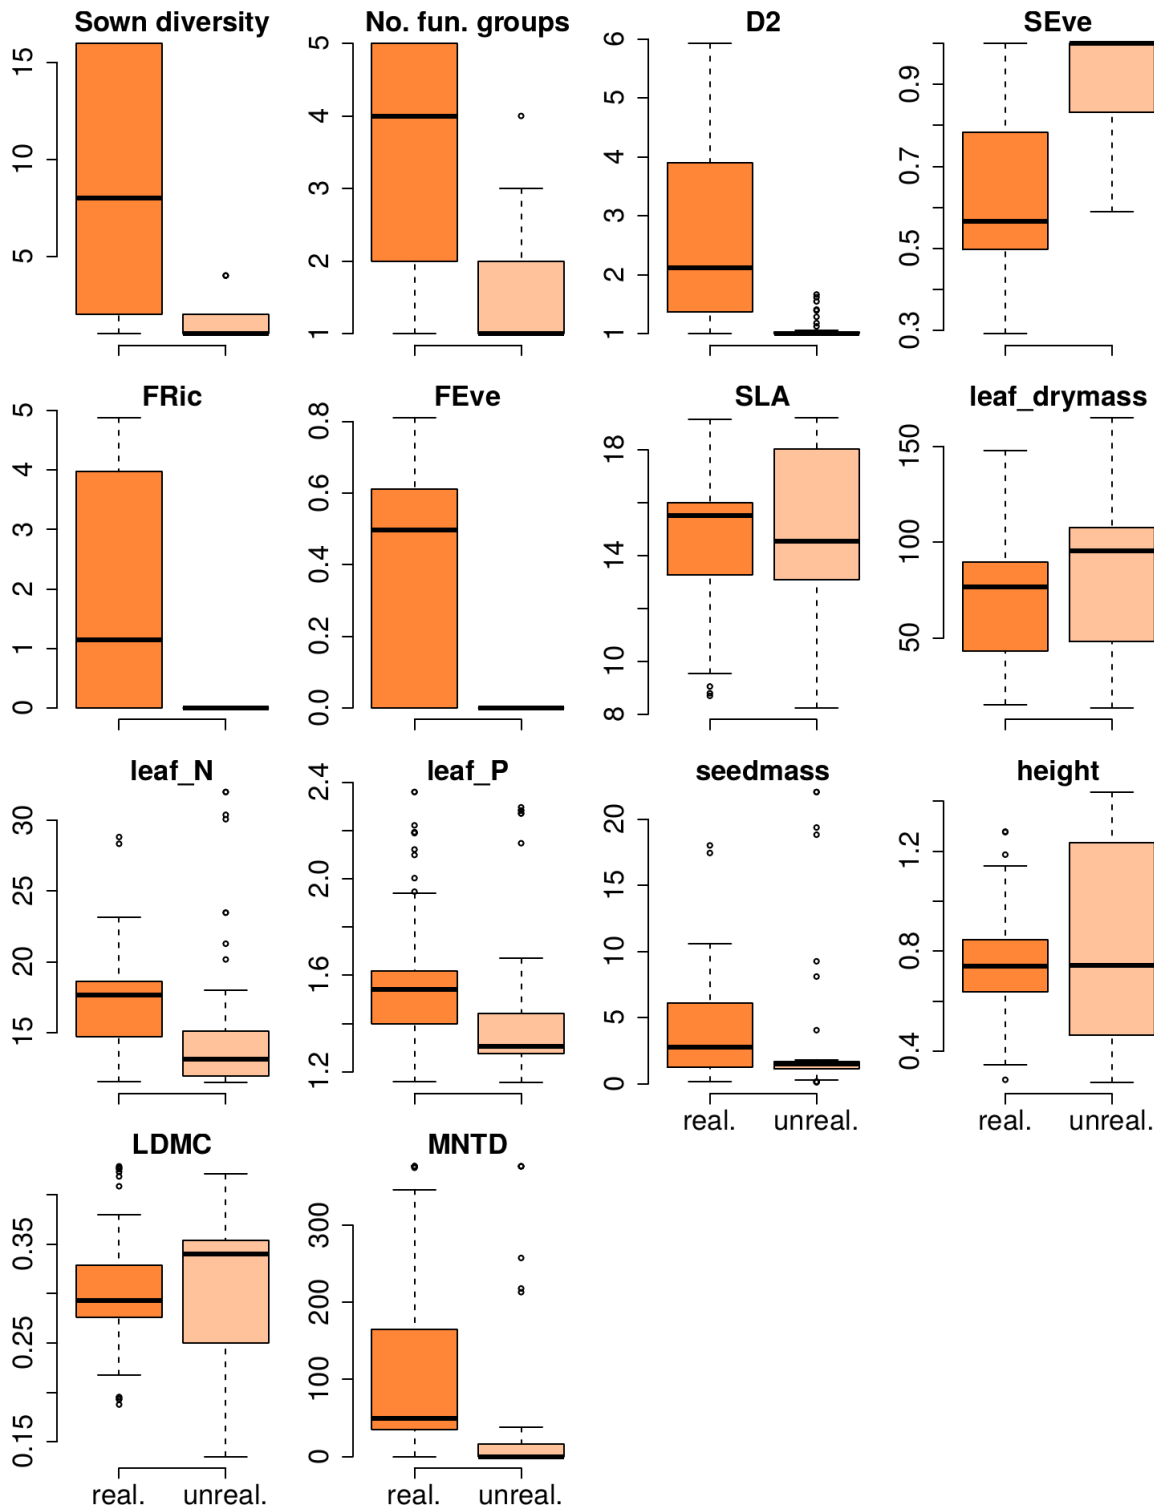

220

221 **Figure S7.** Boxplots of community properties of realistic (strong color) and unrealistic (weak color)  
222 plots for BioDIV. Realistic plots were calculated based on the full set of community properties and the  
223 convex hull volume method. All properties were averaged across all available years per plot (122  
224 realistic and 37 unrealistic plots).

26

225 **Table S7.** T-test results for differences between realistic and unrealistic plots for BioDIV.  
226 Welsh t-tests with unequal variances. Realistic plots were calculated based on the full set of community  
227 properties and the convex hull volume method. All properties were averaged across all available years  
228 per plot (122 realistic and 37 unrealistic plots). T-statistic, degrees of freedom (df), means of realistic  
229 (real) and unrealistic communities (unreal) are rounded to two, p-values to four decimal places.  
230

| model        | t_statistic | df     | mean_real | mean_unreal | p_value |
|--------------|-------------|--------|-----------|-------------|---------|
| sowndiv      | 11.51       | 137.13 | 7.81      | 1.65        | 0       |
| numfg        | 10.95       | 122.28 | 3.49      | 1.54        | 0       |
| D2           | 11.23       | 133.74 | 2.58      | 1.09        | 0       |
| SEve         | -10.43      | 102.79 | 0.64      | 0.92        | 0       |
| FRic         | 10.7        | 121    | 1.82      | 0           | 0       |
| FEve         | 14.65       | 121    | 0.38      | 0           | 0       |
| SLA          | 1.04        | 46.22  | 14.91     | 14.3        | 0.3043  |
| leaf_drymass | -1.27       | 46.88  | 71.95     | 81.76       | 0.2119  |
| leaf_N       | 1.2         | 42.28  | 17.27     | 15.99       | 0.2366  |
| leaf_P       | 1.42        | 46.02  | 1.57      | 1.48        | 0.1633  |
| seedmass     | 0.15        | 41.7   | 3.92      | 3.76        | 0.8815  |
| height       | -1.81       | 40.78  | 0.75      | 0.87        | 0.0773  |
| LDMC         | -0.66       | 44.55  | 0.3       | 0.31        | 0.5149  |
| MNTD         | 1.95        | 55.87  | 107.8     | 61.82       | 0.056   |

231

27

232 **Table S8.** Model parameters for BEF relationships presented in Fig. 2.

233 Values are presented for unconstrained (u) and constrained (c) models of Jena (J) and BioDIV BEF

234 relationships. Constraining was done using all 12 community properties and the convex hull method.

235 Sample size (n), slope estimates (slop), lower (low) and upper (upp) 95% confidence intervals, p-values

236 (p) and adjusted R<sup>2</sup> values (R2). All values are rounded to two decimal places.

237

238

| mod                | u_n    | c_n    | u_slop | c_slop | u_low  | c_low  | u_upp  | c_upp  | u_p  | c_p  | u_R2  | c_R2  |
|--------------------|--------|--------|--------|--------|--------|--------|--------|--------|------|------|-------|-------|
| J_biomass          | 82.00  | 23.00  | 2.39   | 2.03   | 1.87   | 0.45   | 2.91   | 3.61   | 0.00 | 0.01 | 0.51  | 0.22  |
| J_plantCN          | 82.00  | 23.00  | 1.02   | -2.12  | -0.15  | -5.92  | 2.20   | 1.67   | 0.09 | 0.26 | 0.02  | 0.02  |
| J_soilorgC         | 82.00  | 23.00  | 0.09   | 0.06   | 0.04   | -0.10  | 0.13   | 0.23   | 0.00 | 0.42 | 0.14  | -0.01 |
| J_rootbiomass      | 80.00  | 23.00  | 0.10   | 0.04   | 0.07   | -0.05  | 0.14   | 0.13   | 0.00 | 0.37 | 0.34  | -0.01 |
| J_herbivory        | 80.00  | 23.00  | 0.07   | 0.24   | 0.02   | 0.11   | 0.12   | 0.38   | 0.01 | 0.00 | 0.08  | 0.36  |
| J_micBMC           | 80.00  | 23.00  | 48.40  | -8.18  | 23.35  | -92.06 | 73.46  | 75.71  | 0.00 | 0.84 | 0.15  | -0.05 |
| J_Jphosphatase     | 80.00  | 23.00  | 103.17 | 16.33  | 70.38  | -98.35 | 135.97 | 131.01 | 0.00 | 0.77 | 0.33  | -0.04 |
| J_pollinators      | 79.00  | 23.00  | 0.10   | 0.13   | 0.06   | 0.03   | 0.14   | 0.23   | 0.00 | 0.02 | 0.27  | 0.21  |
| BioDIV_biomass     | 159.00 | 122.00 | 0.24   | 0.26   | 0.20   | 0.22   | 0.28   | 0.31   | 0.00 | 0.00 | 0.44  | 0.49  |
| BioDIV_plantCN     | 158.00 | 122.00 | -0.20  | 1.22   | -1.24  | 0.16   | 0.84   | 2.28   | 0.71 | 0.02 | -0.01 | 0.03  |
| BioDIV_soilC       | 158.00 | 122.00 | 0.03   | 0.03   | 0.01   | 0.01   | 0.04   | 0.05   | 0.00 | 0.00 | 0.08  | 0.08  |
| BioDIV_rootbiomass | 150.00 | 117.00 | 261.03 | 266.43 | 221.71 | 216.44 | 300.35 | 316.41 | 0.00 | 0.00 | 0.53  | 0.49  |

239

28

240 **Figure S8.** Alternative versions of Fig. 2 based on the alternative intersection scenarios.  
241 Panels a-h Jena, panels i-l BioDIV (see main text Fig. 2). 8 different versions: 3 methods and 3  
242 community property subsets (but convex hull method with full 16 properties shown in main text  
243 already).  
244 Full 12 – hyper:

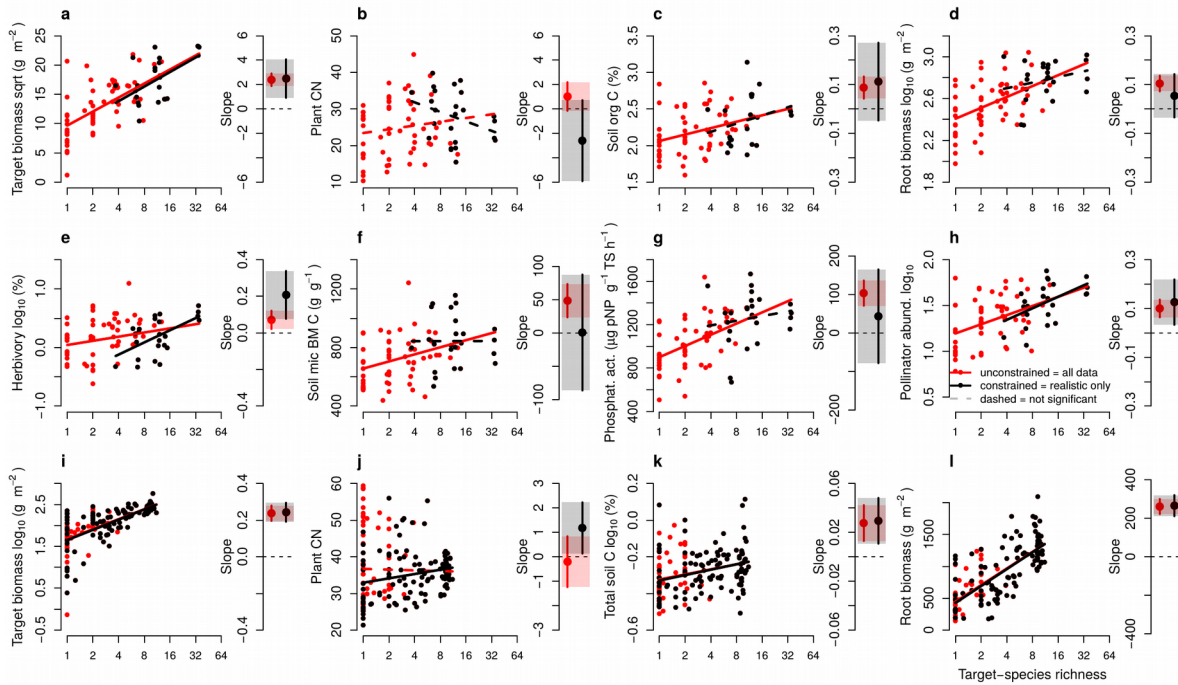

245

246 Full 12 – ellipse:

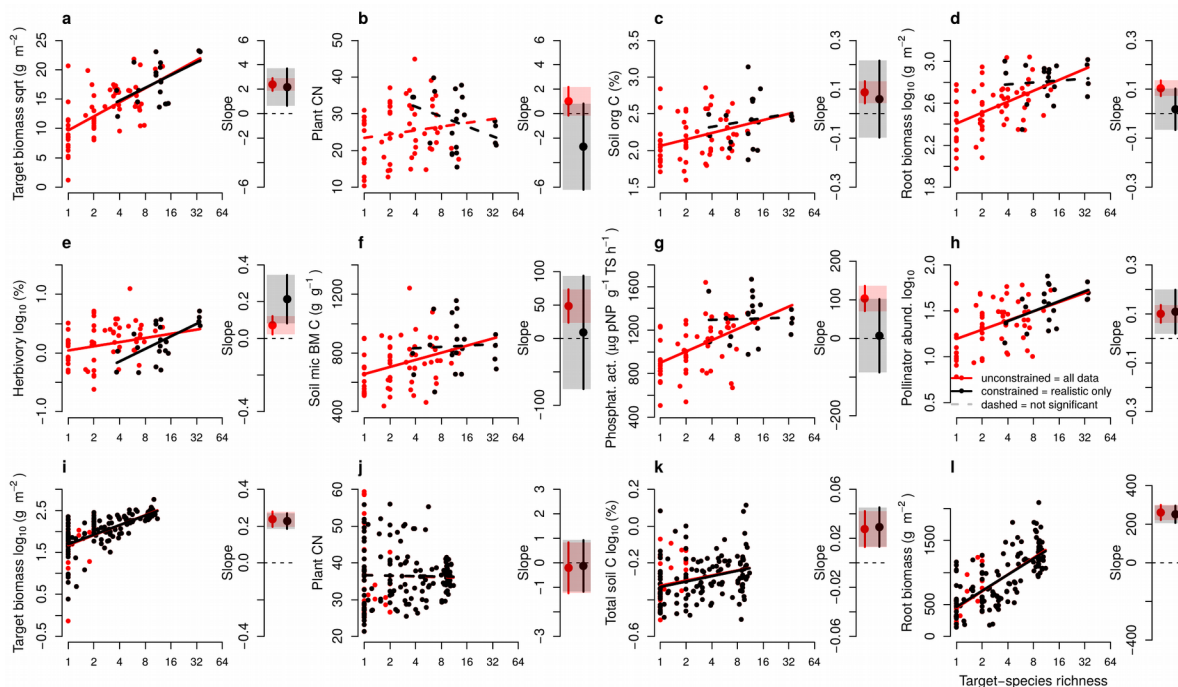

247

29  
248 CWM 8 – chull:

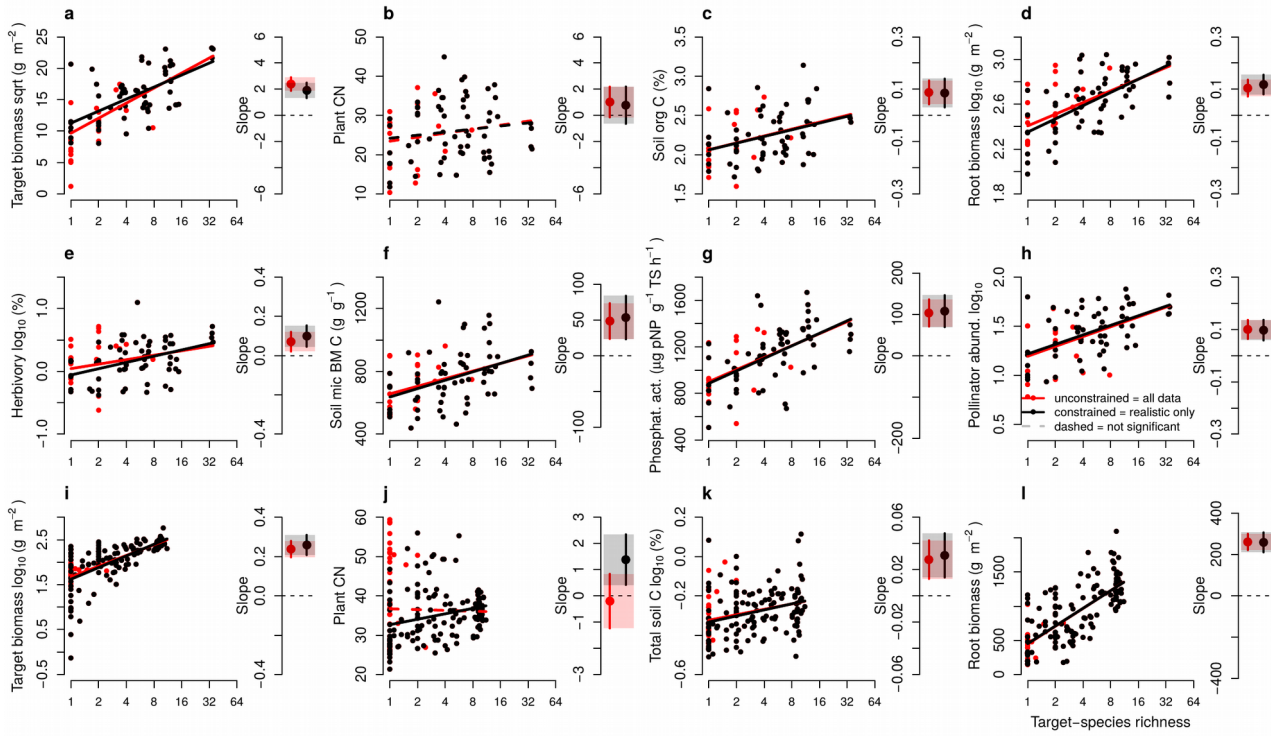

249

250 CWM 8 – hyper:

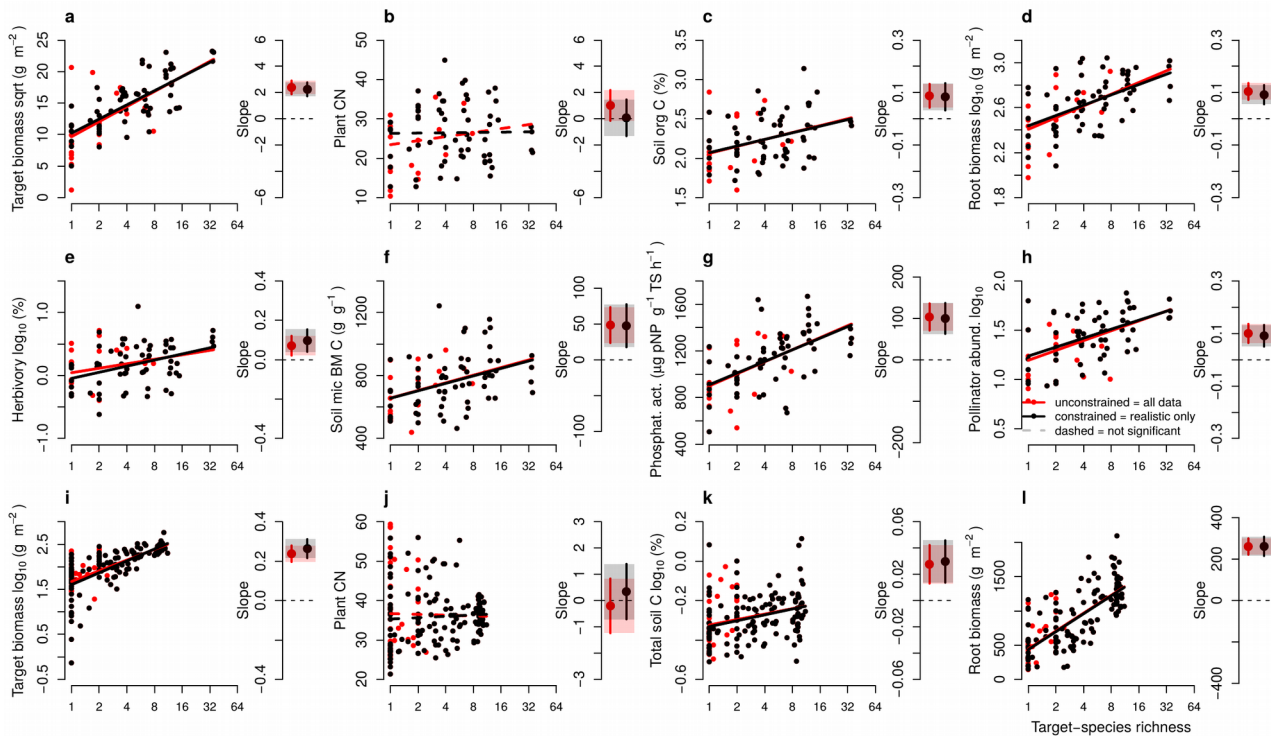

251

252



30  
253 CWM 8 – ellipse:

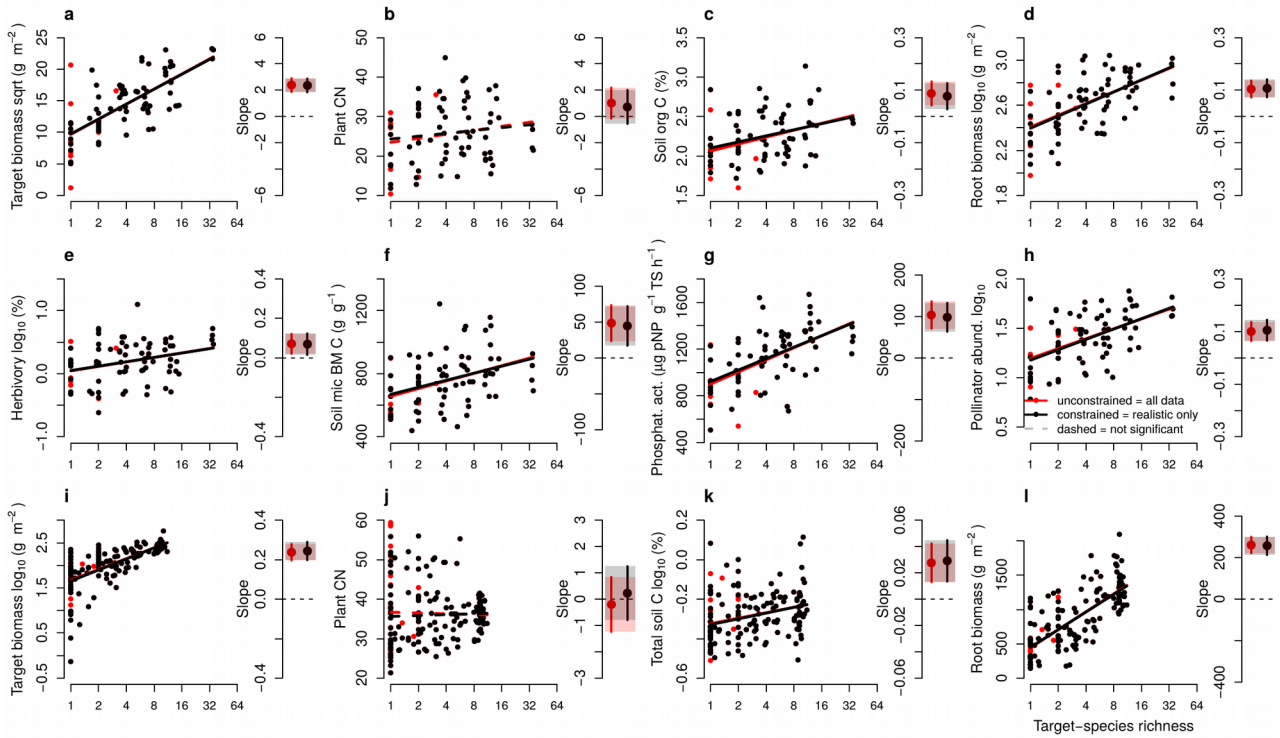

254

255 Fun 4 – chull:

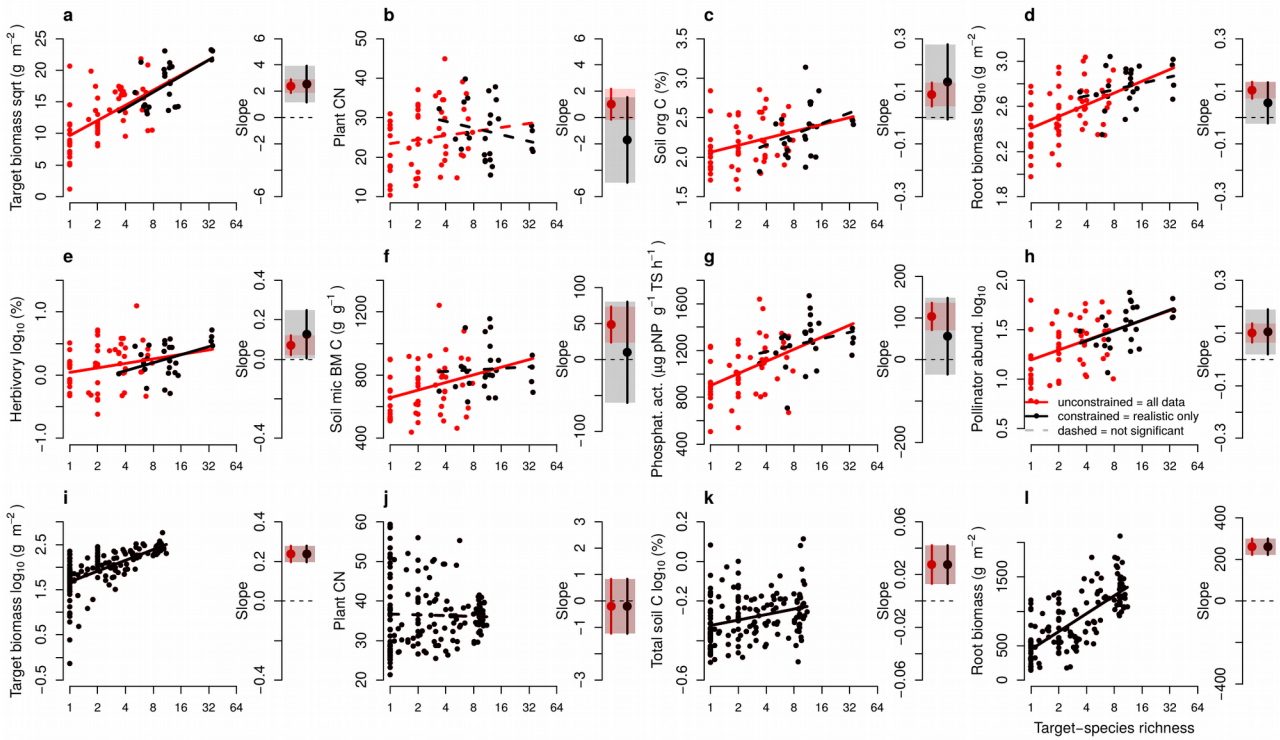

256

257



31  
258 Fun 4 – hyper:

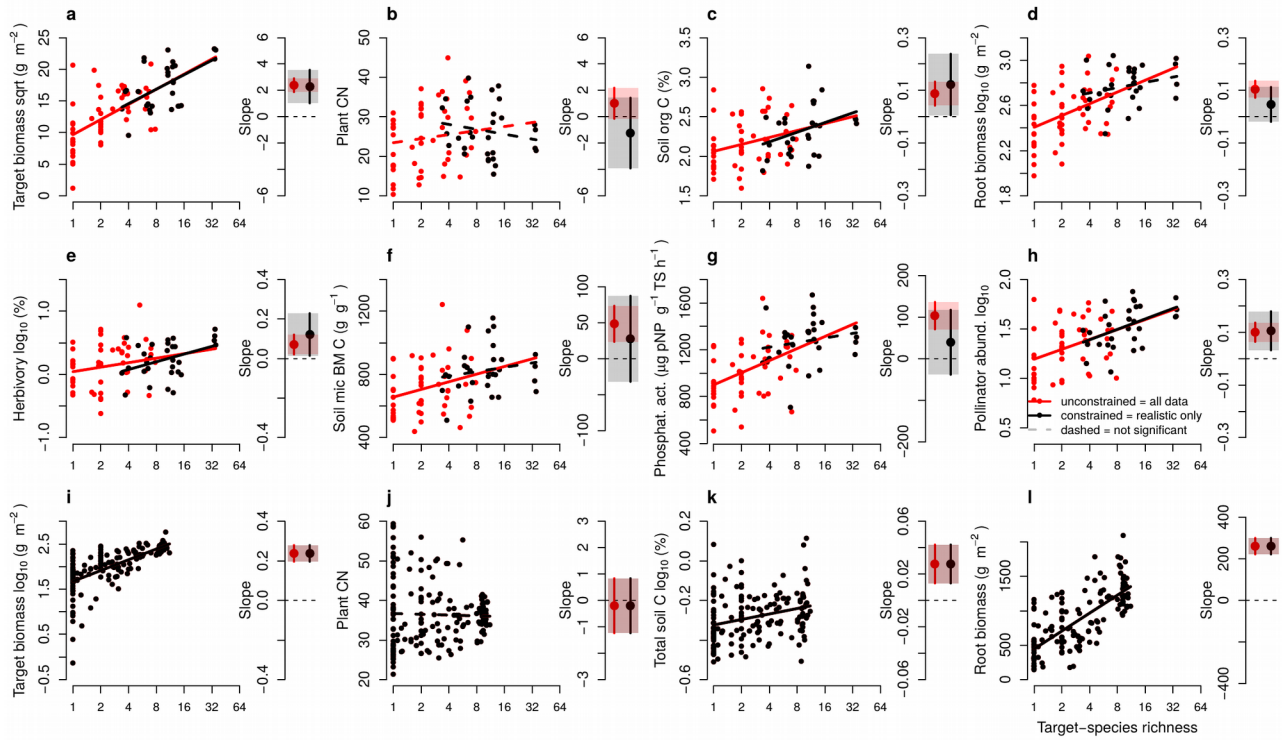

259

260 Fun 4 – ellipse:

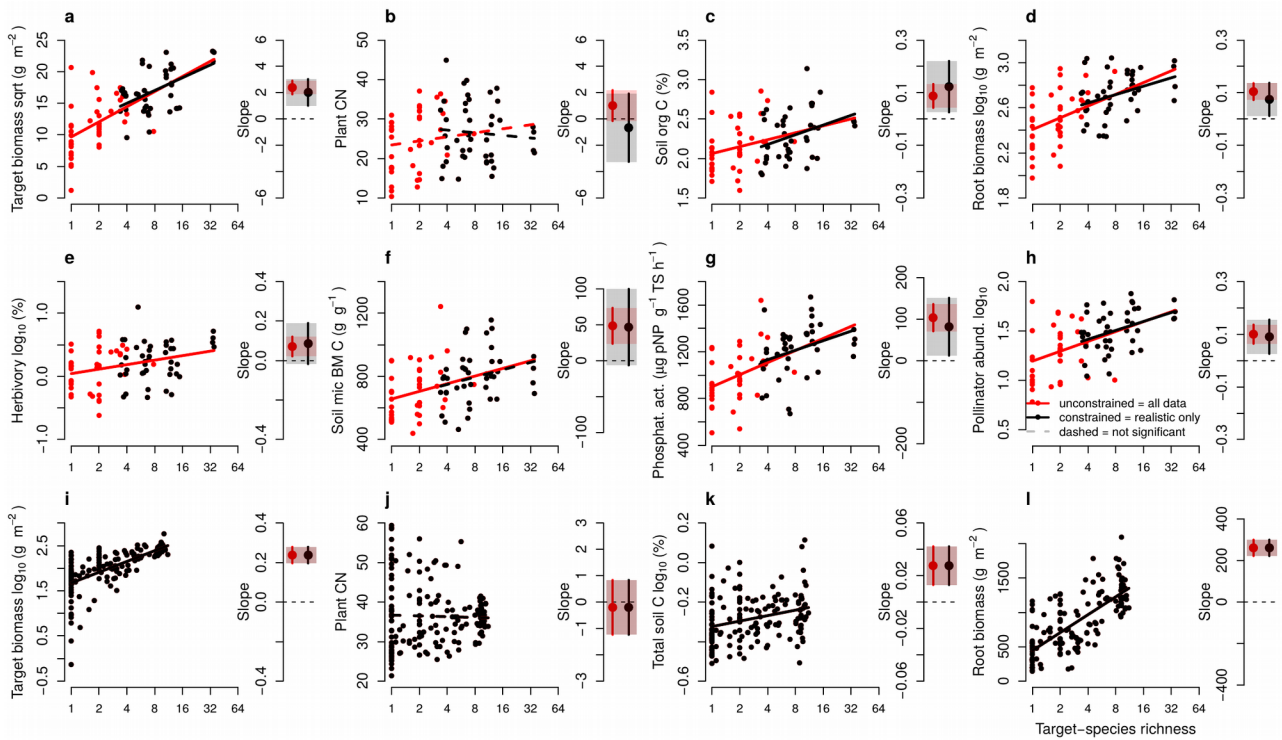

261

262

32

263 **Table S9.** Constraining-related change in functioning at maximum species richness.

264 For each of the 12 BEF relationships from the Jena Experiment (J) and BioDIV presented in Fig. 2, the  
265 table shows the constraining-related percentage change in the model-predicted function variable at  
266 maximum species richness (the proportional difference in the un-transformed function value at the  
267 right-hand tip of the black and red lines in Fig. 2). The average absolute percentage function change is  
268 10.3% (SE: 4%).

269

| function           | % change in predicted functioning |
|--------------------|-----------------------------------|
| J_biomass          | -3.9                              |
| J_plantCN          | -18.75                            |
| J_soilorgC         | -0.46                             |
| J_rootbiomass      | -20.24                            |
| J_herbivory        | 46.24                             |
| J_micBMC           | -7.8                              |
| J_Jphosphatase     | -8.17                             |
| J_pollinators      | 9.74                              |
| BioDIV_biomass     | 3.78                              |
| BioDIV_plantCN     | 3.59                              |
| BioDIV_soilC       | 0.39                              |
| BioDIV_rootbiomass | -0.05                             |

270

33

271 **Figure S9:** Random selection sensitivity analysis for Fig. 2 relationships turning insignificant.  
272 We performed a sensitivity analysis testing if changes in BEF relationships from being significant (all  
273 communities) to non-significant (realistic sites only) were likely caused by the related reduction in  
274 sample size or if a randomly-selected reduced number of plots was still likely to result in a significant  
275 relationship. Therefore, for each of the four BEF relationships found to switch significance (Jena soil  
276 organic C (a-c), root biomass (d-f), soil microbial biomass C (g-i) and phosphatase activity (j-l)), we  
277 repeatedly (500 times), randomly selected 23 Jena plots and re-ran the model testing for the BEF  
278 relationship and saving the slope estimates and p-values. This figure shows the distribution of these 500  
279 random-selection slopes (boxplots in first column and orange lines in middle column) in comparison to  
280 the unconstrained (all sites, red lines) and constrained (PCA-selection based realistic sites only, black  
281 dashed lines) slopes from Fig. 2. Dotted black lines indicate zero slopes. The right column shows the  
282 frequency of positive significant, positive insignificant, negative insignificant and negative significant  
283 relationships obtained by the 500 random subsets of 23 plots with the black bar highlighting the PCA-  
284 based realistic result from Fig. 2.

285 The sensitivity analysis shows that black dashed lines and the results of the PCA-based realistic subset  
286 divert relatively strongly from the 500 random-selection results. Specifically, the PCA-based realistic  
287 subset resulted in strikingly shallower slopes than the random choices and non-significantly positive or  
288 even negative relationships while a big part of the random subsets resulted in significant positive or at  
289 least non-significantly positive relationships. As such, our PCA-based selection of realistic sites is  
290 highly non-random in comparison to the random-selection of plots, thus indicating that our  
291 methodology is successful in finding a subset of plots based on prior knowledge (realistic plots based  
292 on the multidimensional, multivariate comparison of communities) and does not simply create a  
293 random subset of plots. Furthermore, these results show that, for these four Jena soil processes,  
294 experiment-derived BEF relationships might not be as important or strong in real-world systems, at  
295 least as long as plant communities in experiments deviate from those in real-world systems. Future  
296 developments of real-world plant communities due to global change drivers and increasing  
297 anthropogenic pressure might change this conclusion by rendering less diverse communities realistic,  
298 thus aligning the species richness gradients of biodiversity experiments and related real-world systems  
299 and increasing the slope of the BEF relationships.

34

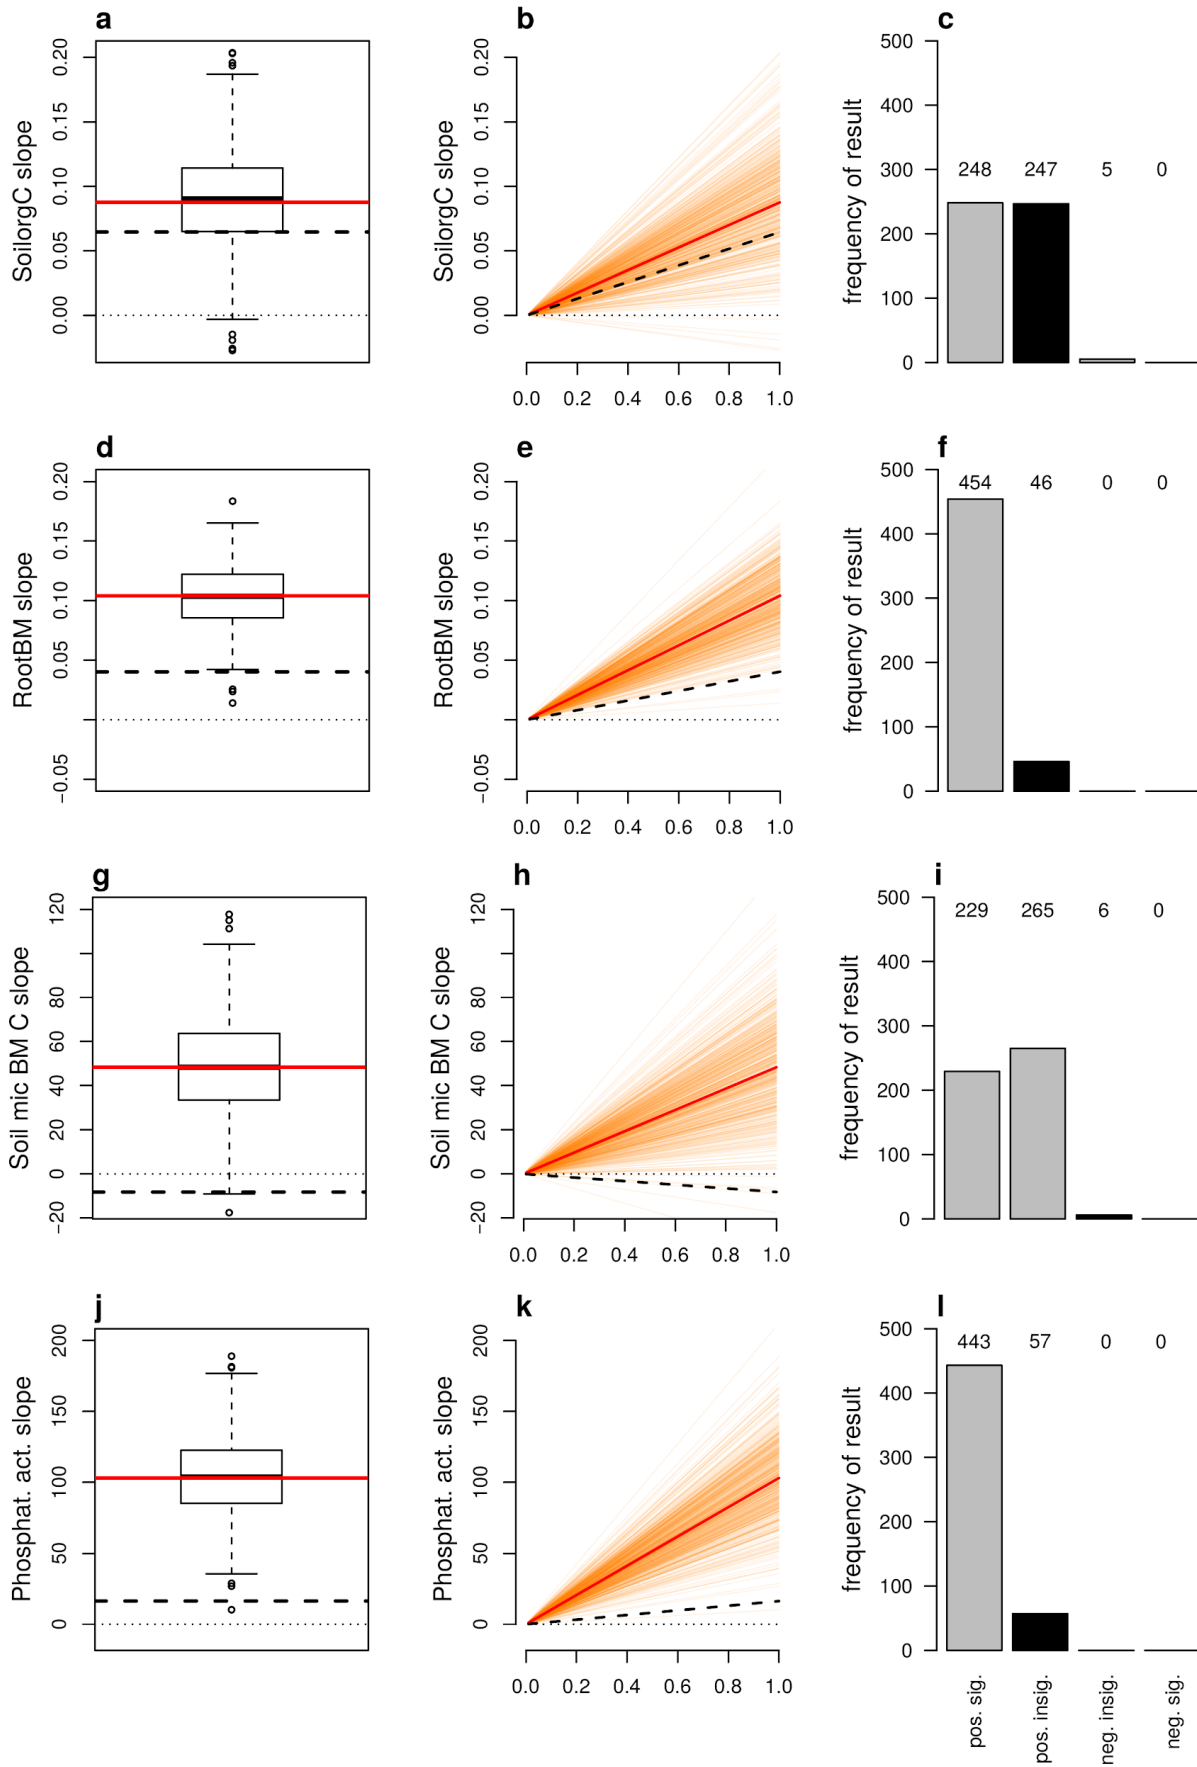

300

35

301 **Table S10.** Differences between range in function unconstrained and constrained data underlying the  
302 BEF relationships in Fig. 2. Values are presented for unconstrained and constrained datasets of Jena (J)  
303 and BioDIV BEF relationships. Constraining was done using all 12 community properties and the  
304 convex hull method. Ranges were calculated based maximum and minimum function performance in  
305 unconstrained and constrained datasets. Range changes were calculated as the proportion of  
306 unconstrained functioning still covered by constrained functioning. Changes are caused by the removal  
307 of unrealistic plots which changes the distribution of function values for a given species richness level,  
308 but also by the reduction of the species richness gradient that is caused by the removal of plots. The  
309 across-year species richness gradient in Jena changed from 1-35.2 species (unconstrained) to 3.7-35.2  
310 species (constrained). The BioDIV species richness gradient was 1-11.1 species and did not change  
311 from unconstrained to constrained datasets.

312

| model_name         | uncon_range | con_range | range_change |
|--------------------|-------------|-----------|--------------|
| J_biomass          | 22          | 9.7       | 0.44         |
| J_plantCN          | 34.59       | 24.33     | 0.7          |
| J_soilorgC         | 1.54        | 1.26      | 0.82         |
| J_rootbiomass      | 1.06        | 0.66      | 0.63         |
| J_herbivory        | 1.72        | 1.05      | 0.61         |
| J_micBMC           | 800.54      | 624.56    | 0.78         |
| J_Jphosphatase     | 1159.23     | 956.63    | 0.83         |
| J_pollinators      | 1.1         | 0.82      | 0.74         |
| BioDIV_biomass     | 2.91        | 2.38      | 0.82         |
| BioDIV_plantCN     | 38.04       | 34.59     | 0.91         |
| BioDIV_soilC       | 0.62        | 0.62      | 1            |
| BioDIV_rootbiomass | 1952.87     | 1952.87   | 1            |
| Jena_avg           |             |           | 0.69         |
| BioDIV_avg         |             |           | 0.93         |
| Overall_avg        |             |           | 0.77         |

313

36

314 **Table S11.** Correlation coefficients for CWM's versus functional, phylogenetic metrics and evenness,  
 315 German dataset. Pearson correlation coefficients for Jena Experiment (upper part) and combined  
 316 German real world community properties (lower part). Bold values are mean absolute correlation  
 317 coefficients for the columns, the overall mean is the absolute mean across all column averages.  
 318

| Jena                | Rao         |             |             |             |             |             |            |
|---------------------|-------------|-------------|-------------|-------------|-------------|-------------|------------|
|                     | FEve        | FDiv        | FDis        | Q           | SEve        | MPD         | MNTD       |
| leaf_area           | -0.02       | -0.03       | 0.02        | 0.07        | -0.01       | 0           | 0.12       |
| SLA                 | 0           | -0.09       | 0.05        | 0.06        | 0.09        | 0.09        | -0.02      |
| leaf_drymass        | 0.05        | 0.11        | 0.1         | 0.08        | -0.12       | 0.08        | 0.23       |
| LDMC                | 0           | 0.03        | 0.02        | 0.06        | -0.07       | -0.08       | -0.15      |
| leaf_N              | 0.09        | 0.07        | 0.14        | 0.13        | -0.09       | 0.05        | -0.03      |
| leaf_P              | 0.12        | 0.16        | 0.22        | 0.21        | -0.16       | 0.18        | 0.02       |
| height              | 0.04        | 0.05        | 0.04        | 0.1         | -0.08       | -0.08       | -0.12      |
| seedmass            | -0.01       | 0.02        | -0.02       | 0.03        | 0.01        | -0.1        | -0.13      |
| <b>avg_abs</b>      | <b>0.04</b> | <b>0.07</b> | <b>0.08</b> | <b>0.09</b> | <b>0.08</b> | <b>0.08</b> | <b>0.1</b> |
| <b>overall mean</b> | <b>0.08</b> |             |             |             |             |             |            |

| German RW           | Rao         |             |             |             |             |             |             |
|---------------------|-------------|-------------|-------------|-------------|-------------|-------------|-------------|
|                     | FEve        | FDiv        | FDis        | Q           | SEve        | MPD         | MNTD        |
| leaf_area           | -0.08       | -0.09       | 0.34        | 0.47        | 0.19        | 0.04        | 0.12        |
| SLA                 | -0.21       | -0.21       | 0.07        | 0.07        | 0.14        | -0.13       | 0.02        |
| leaf_drymass        | -0.03       | 0.12        | 0.52        | 0.57        | 0.25        | 0.36        | 0.18        |
| LDMC                | 0.1         | -0.09       | -0.23       | -0.2        | -0.25       | -0.5        | -0.06       |
| leaf_N              | -0.15       | -0.05       | 0.29        | 0.26        | 0.12        | 0.25        | 0.05        |
| leaf_P              | -0.18       | -0.24       | 0.06        | 0.11        | 0.06        | -0.16       | 0.03        |
| height              | -0.03       | -0.22       | -0.04       | 0.05        | -0.07       | -0.5        | -0.07       |
| seedmass            | 0.14        | 0.14        | 0.35        | 0.42        | 0.04        | 0.16        | 0.08        |
| <b>avg_abs</b>      | <b>0.11</b> | <b>0.15</b> | <b>0.24</b> | <b>0.27</b> | <b>0.14</b> | <b>0.26</b> | <b>0.08</b> |
| <b>overall mean</b> | <b>0.18</b> |             |             |             |             |             |             |

319

37

320 **Table S12.** Correlation coefficients for CWM's versus functional, phylogenetic metrics and evenness,  
 321 US dataset. Pearson correlation coefficients for BioDIV (upper part) and combined US real world  
 322 community properties (lower part). Bold values are mean absolute correlation coefficients for the  
 323 columns, the overall mean is the absolute mean across all column averages.  
 324

| <b>BioDIV</b>       | Rao         |             |             |             |             |             |            |
|---------------------|-------------|-------------|-------------|-------------|-------------|-------------|------------|
|                     | FEve        | FDiv        | FDis        | Q           | SEve        | MPD         | MNTD       |
| leaf_area           | 0.13        | 0.2         | 0.4         | 0.47        | -0.17       | 0.24        | 0.1        |
| SLA                 | 0.15        | 0.18        | 0.22        | 0.26        | -0.19       | 0.15        | -0.08      |
| leaf_drymass        | 0.04        | 0.1         | 0.26        | 0.32        | -0.1        | 0.12        | 0.07       |
| LDMC                | -0.11       | -0.14       | -0.3        | -0.35       | 0.1         | -0.25       | -0.12      |
| leaf_N              | 0.05        | 0.03        | 0.22        | 0.26        | 0.04        | 0.23        | 0.13       |
| leaf_P              | -0.02       | -0.02       | 0.13        | 0.17        | 0.08        | 0.09        | 0.13       |
| height              | 0.01        | 0.08        | 0.01        | 0.02        | -0.15       | -0.06       | -0.07      |
| seedmass            | 0.11        | 0.15        | 0.37        | 0.44        | -0.13       | 0.27        | 0.14       |
| <b>avg_abs</b>      | <b>0.08</b> | <b>0.11</b> | <b>0.24</b> | <b>0.29</b> | <b>0.12</b> | <b>0.18</b> | <b>0.1</b> |
| <b>overall mean</b> | <b>0.16</b> |             |             |             |             |             |            |

| <b>USA RW</b>       | Rao         |             |             |             |             |             |            |
|---------------------|-------------|-------------|-------------|-------------|-------------|-------------|------------|
|                     | FEve        | FDiv        | FDis        | Q           | SEve        | MPD         | MNTD       |
| leaf_area           | 0.09        | 0.13        | 0.5         | 0.6         | -0.07       | 0.38        | 0.12       |
| SLA                 | 0.06        | 0.08        | 0.15        | 0.14        | -0.21       | 0.33        | 0.23       |
| leaf_drymass        | 0.07        | 0.11        | 0.51        | 0.65        | -0.04       | 0.32        | 0.1        |
| LDMC                | -0.11       | -0.06       | -0.27       | -0.23       | 0.06        | -0.33       | -0.13      |
| leaf_N              | -0.18       | -0.36       | -0.29       | -0.2        | 0.18        | -0.2        | 0.13       |
| leaf_P              | 0.13        | -0.03       | 0.33        | 0.29        | -0.01       | 0.48        | 0.38       |
| height              | -0.23       | -0.18       | -0.41       | -0.28       | 0.08        | -0.55       | -0.24      |
| seedmass            | 0.04        | -0.03       | 0.29        | 0.36        | 0.01        | 0.29        | 0.29       |
| <b>avg_abs</b>      | <b>0.11</b> | <b>0.12</b> | <b>0.34</b> | <b>0.34</b> | <b>0.08</b> | <b>0.36</b> | <b>0.2</b> |
| <b>overall mean</b> | <b>0.22</b> |             |             |             |             |             |            |

38

325 **Table S13.** PCA scores for full 12 community properties on PCA's in Fig. 1.

326 Scores have been produced using the scores() command of the “vegan” package<sup>22</sup> in R and have been  
327 rounded to 2 decimal places.

328

|              | <b>Germany</b> |            | <b>USA</b> |            |
|--------------|----------------|------------|------------|------------|
|              | <b>PC1</b>     | <b>PC2</b> | <b>PC1</b> | <b>PC2</b> |
| FRic         | -3.47          | 0.28       | 2.90       | -3.24      |
| FEve         | -2.60          | 0.54       | 2.19       | -2.33      |
| SLA          | -0.93          | 2.47       | 3.19       | -0.14      |
| leaf_drymass | 0.69           | 0.84       | 0.76       | 1.50       |
| LDMC         | -1.45          | -2.53      | -3.32      | -1.86      |
| leaf_N       | 0.24           | 3.15       | 2.18       | 3.21       |
| leaf_P       | -0.67          | 2.58       | 3.69       | 1.41       |
| height       | -0.93          | -0.91      | -2.71      | 0.22       |
| seedmass     | 1.04           | 1.01       | 2.80       | 3.04       |
| D2           | -2.53          | 0.32       | 3.13       | -2.39      |
| SEve         | 3.16           | -0.18      | -2.16      | 3.15       |
| MNTD         | 2.22           | 0.39       | 0.83       | 2.24       |

329



39

330 **Table S14.** Full dataset of community properties for all plots used in the PCA's over all years  
331 (submitted along with R-code at first submission).

40  
332

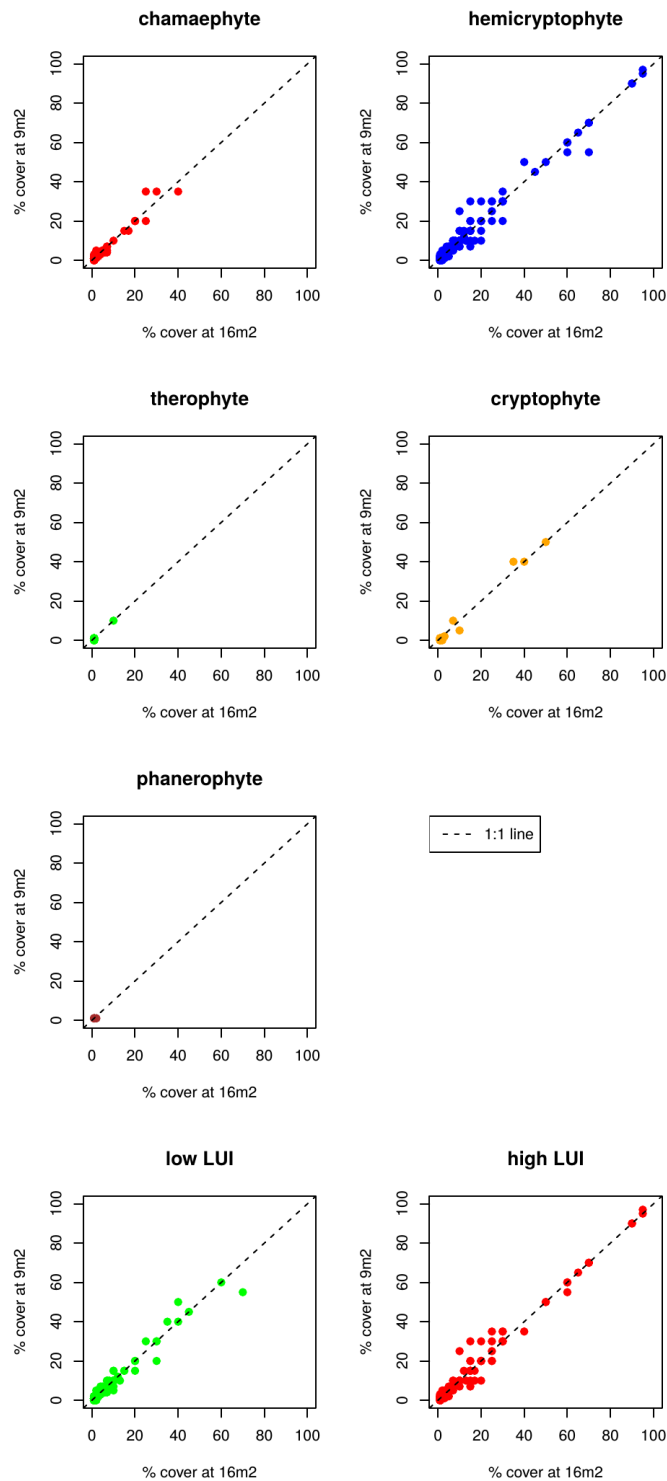

333 **Figure S10.1** Cover versus vegetation survey size scaling sensitivity check for Biodiversity  
334 Exploratories (German real world). Here, 16 to 9 m<sup>2</sup>, which is the vegetation survey area of the Jena  
335 main and Jena real world plots. For this figure, species were sorted into lifeforms using the R package  
336 “TR8”<sup>23</sup> and information from The Ecological Flora Database<sup>24</sup>.

41

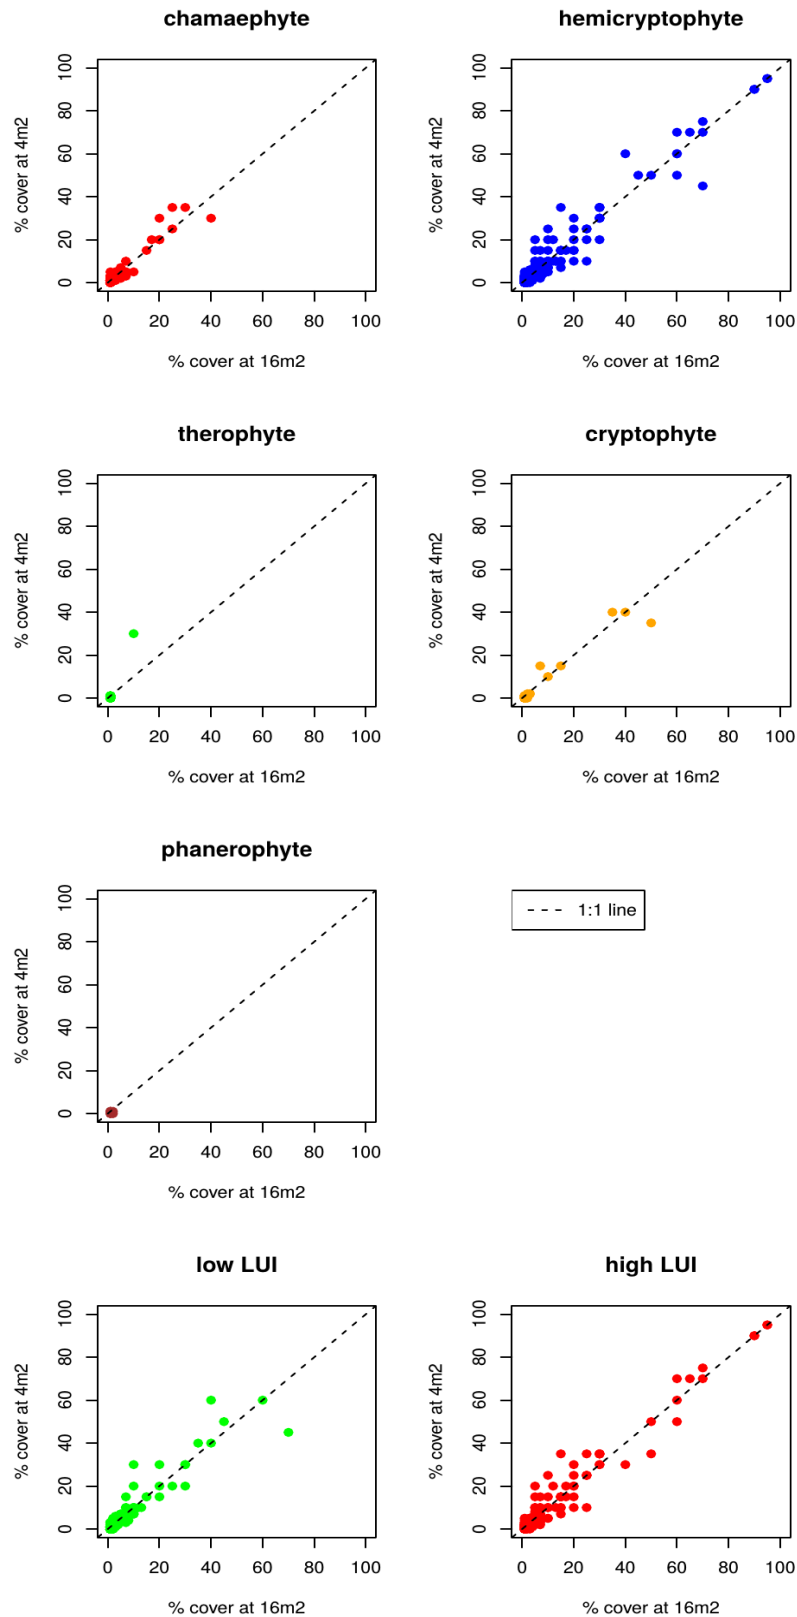

337 **Figure S10.2** Cover versus vegetation survey size scaling sensitivity check for Biodiversity  
338 Exploratories (German real world). Here, 16 to 4 m<sup>2</sup>, which resembles the vegetation survey area of the  
339 Jena invasion plots. For this figure, species were sorted into lifeforms using the R package “TR8”<sup>23</sup> and  
340 information from The Ecological Flora Database<sup>24</sup>.

42

341 **Figure S11.** Phylogenetic backbone tree (one example of the 50 replicates).

342 Overall 664 species. 132 species (19.9%, pink dots) that were not present in the backbone phylogeny

343 used to build this tree were randomly inserted into their genera (see methods for details)

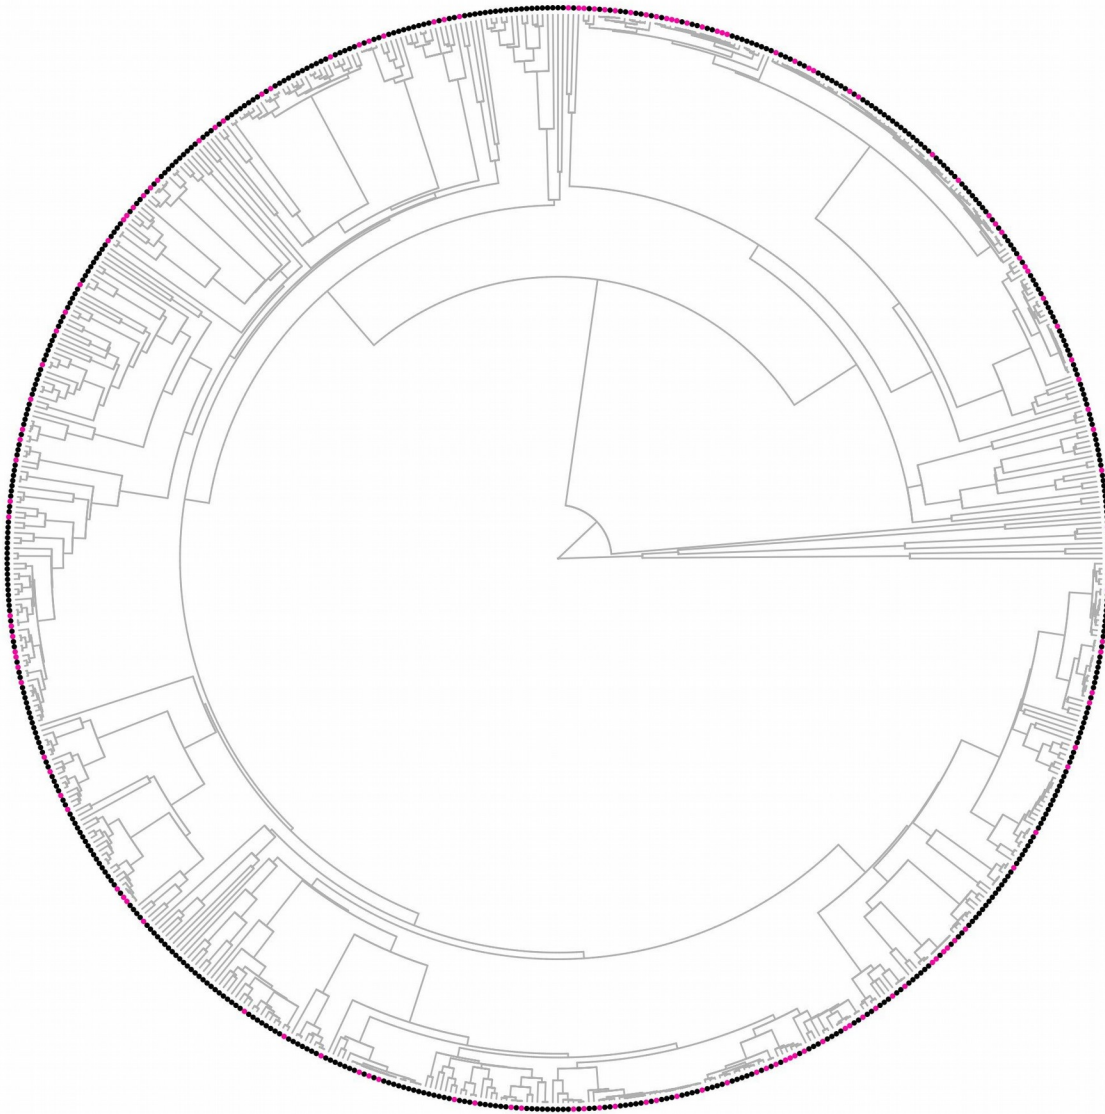

43

345 **Table S15.** TRY references for plant species trait data from TRY<sup>25</sup> requests 2968 and 4106. Data  
 346 sources are sorted by the region their trait data have been used for (Germany=GER or USA). Note that,  
 347 as mentioned in the main text, trait data for the USA dataset have been complemented by data from  
 348 Cedar Creek plant trait assessments by Jane Catford, Peter Reich and Jeannine Cavender-Bares.  
 349

| Region | TRY_Dataset                                                               | Reference                                                                                                                                                                                                                                                                                                                                                                                                                                                                                                                                                                                           |
|--------|---------------------------------------------------------------------------|-----------------------------------------------------------------------------------------------------------------------------------------------------------------------------------------------------------------------------------------------------------------------------------------------------------------------------------------------------------------------------------------------------------------------------------------------------------------------------------------------------------------------------------------------------------------------------------------------------|
| GER    | Altitudinal Vicariants Spain                                              | Milla & Reich 2011 <i>Annals of Botany</i> 107: 455–465, 2011.                                                                                                                                                                                                                                                                                                                                                                                                                                                                                                                                      |
| GER    | ArtDeco Database                                                          | Cornwell, W. K., J. H. C. Cornelissen, K. Amatangelo, E. Dorrepaal, V. T. Eviner, O. Godoy, S. E. Hobbie, B. Hoorens, H. Kurokawa, N. Pérez-Harguindeguy, H. M. Quested, L. S. Santiago, D. A. Wardle, I. J. Wright, R. Aerts, S. D. Allison, P. van Bodegom, V. Brovkin, A. Chatain, T. V. Callaghan, S. Díaz, E. Garnier, D. E. Gurvich, E. Kazakou, J. A. Klein, J. Read, P. B. Reich, N. A. Soudzilovskaia, M. V. Vaieretti, and M. Westoby. 2008. Plant species traits are the predominant control on litter decomposition rates within biomes worldwide. <i>Ecology Letters</i> 11:1065-1071. |
| GER    | BASECO: a floristic and ecological database of Mediterranean French flora | Sophie Gachet, Errol VÅ©la, Thierry Tatoni, 2005, BASECO: a floristic and ecological database of Mediterranean French flora. <i>Biodiversity and Conservation</i> 14(4):1023-1034                                                                                                                                                                                                                                                                                                                                                                                                                   |
| GER    | BiolFlor Database                                                         | Briemle, G., Nitsche, S. & Nitsche, L. (2002): Nutzungswertzahlen für Gefäßpflanzen des Grünlandes. In: Klotz, S., Kühn, I. & Durka, W. [eds.]: BIOLFLORE - Eine Datenbank zu biologisch-ökologischen Merkmalen der Gefäßpflanzen in Deutschland. -Schriftenreihe für Vegetationskunde 38. Bundesamt für Naturschutz, Bonn.                                                                                                                                                                                                                                                                         |
| GER    | BiolFlor Database                                                         | Durka, W. (2002): Blüten- und Reproduktionsbiologie. In: Klotz, S., Kühn, I. & Durka, W. [eds.]: BIOLFLORE - Eine Datenbank zu biologisch-ökologischen Merkmalen der Gefäßpflanzen in Deutschland. - Schriftenreihe für Vegetationskunde 38: 133-175. Bundesamt für Naturschutz, Bonn.                                                                                                                                                                                                                                                                                                              |
| GER    | BiolFlor Database                                                         | Durka, W. (2002): Chromosomenzahlen, Ploidiestufen und DNA-Gehalte. In: Klotz, S., Kühn, I. & Durka, W. [eds.]: BIOLFLORE - Eine Datenbank zu biologisch-ökologischen Merkmalen der Gefäßpflanzen in Deutschland. - Schriftenreihe für Vegetationskunde 38. Bundesamt für Naturschutz, Bonn.                                                                                                                                                                                                                                                                                                        |
| GER    | BiolFlor Database                                                         | Durka, W. (2002) Phylogenie der Farn- und Blütenpflanzen Deutschlands. - In: Klotz, S., Kühn, I. & Durka, W. [Hrsg.]: BIOLFLORE - Eine Datenbank zu biologisch-ökologischen Merkmalen der Gefäßpflanzen in Deutschland. - Schriftenreihe für Vegetationskunde 38: 75-91. Bundesamt für Naturschutz, Bonn.                                                                                                                                                                                                                                                                                           |
| GER    | BiolFlor Database                                                         | Klotz, S. & Kühn, I. (2002): Blattmerkmale. - In: Klotz, S., Kühn, I. & Durka, W. [Hrsg.]: BIOLFLORE - Eine Datenbank zu biologisch-ökologischen Merkmalen der Gefäßpflanzen in Deutschland. - Schriftenreihe für Vegetationskunde 38: 119-126. Bundesamt für Naturschutz, Bonn.                                                                                                                                                                                                                                                                                                                    |
| GER    | BiolFlor Database                                                         | Klotz, S. & Kühn, I. (2002): Indikatoren zum anthropogenen Einfluss auf die Vegetation. In: Klotz, S., Kühn, I. & Durka, W. [eds.]: BIOLFLORE - Eine Datenbank zu biologisch-ökologischen Merkmalen der Gefäßpflanzen in Deutschland. - Schriftenreihe für Vegetationskunde 38: 241-246. Bundesamt für Naturschutz, Bonn.                                                                                                                                                                                                                                                                           |
| GER    | BiolFlor Database                                                         | Klotz, S. & Kühn, I. (2002): Ökologische Strategietypen. - In: Klotz, S., Kühn, I. & Durka, W. [Hrsg.]: BIOLFLORE - Eine Datenbank zu biologisch-ökologischen Merkmalen der Gefäßpflanzen in Deutschland. - Schriftenreihe für Vegetationskunde 38: 197-201. Bundesamt für Naturschutz, Bonn.                                                                                                                                                                                                                                                                                                       |
| GER    | BiolFlor Database                                                         | Klotz, S. & Kühn, I. (2002): Soziologische Bindung der Arten. In: Klotz, S., Kühn, I. & Durka, W. [eds.]: BIOLFLORE - Eine Datenbank zu biologisch-ökologischen Merkmalen der Gefäßpflanzen in Deutschland. - Schriftenreihe für Vegetationskunde 38: 273-281. Bundesamt für Naturschutz, Bonn.                                                                                                                                                                                                                                                                                                     |
| GER    | BiolFlor Database                                                         | Krumbiegel, A. (2002): Morphologie der vegetativen Organe (außer Blätter). In: Klotz, S., Kühn, I. & Durka, W. [eds.]: BIOLFLORE - Eine Datenbank zu biologisch-ökologischen Merkmalen der Gefäßpflanzen in Deutschland. - Schriftenreihe für Vegetationskunde 38: 93-                                                                                                                                                                                                                                                                                                                              |

|     |                                                                          |                                                                                                                                                                                                                                                                                                                                                                                                                                                                                                                |
|-----|--------------------------------------------------------------------------|----------------------------------------------------------------------------------------------------------------------------------------------------------------------------------------------------------------------------------------------------------------------------------------------------------------------------------------------------------------------------------------------------------------------------------------------------------------------------------------------------------------|
|     |                                                                          | 118. Bundesamt für Naturschutz, Bonn.                                                                                                                                                                                                                                                                                                                                                                                                                                                                          |
| GER | BiolFlor Database                                                        | Kühn, I. Klotz, S. (2002): Angaben zu den Arealen. In: Klotz, S., Kühn, I. & Durka, W. [eds.]: BIOLFLORE - Eine Datenbank zu biologisch-ökologischen Merkmalen der Gefäßpflanzen in Deutschland. - Schriftenreihe für Vegetationskunde 38: 227-239. Bundesamt für Naturschutz, Bonn.                                                                                                                                                                                                                           |
| GER | BiolFlor Database                                                        | Kühn, I., Klotz, S. (2002): Floristischer Status und gebietsfremde Arten. In: Klotz, S., Kühn, I. & Durka, W. [eds.]: BIOLFLORE - Eine Datenbank zu biologisch-ökologischen Merkmalen der Gefäßpflanzen in Deutschland. - Schriftenreihe für Vegetationskunde 38: 47-56. Bundesamt für Naturschutz, Bonn.                                                                                                                                                                                                      |
| GER | BiolFlor Database                                                        | Kühn, I., W. Durka, and S. Klotz. 2004. BiolFlor - a new plant-trait database as a tool for plant invasion ecology. <i>Diversity and Distribution</i> 10 363-365.                                                                                                                                                                                                                                                                                                                                              |
| GER | BiolFlor Database                                                        | Otto, B. (2002): Merkmale von Samen, Früchten, generativen Germinulen und generativen Diasporen. In: Klotz, S., Kühn, I. & Durka, W. [eds.]: BIOLFLORE - Eine Datenbank zu biologisch-ökologischen Merkmalen der Gefäßpflanzen in Deutschland. - Schriftenreihe für Vegetationskunde 38. Bundesamt für Naturschutz, Bonn.                                                                                                                                                                                      |
| GER | BiolFlor Database                                                        | Trefflich, A., Klotz, S. & Kühn, I. (2002): Blühphänologie. In: Klotz, S., Kühn, I. & Durka, W. [eds.]: BIOLFLORE - Eine Datenbank zu biologisch-ökologischen Merkmalen der Gefäßpflanzen in Deutschland. - Schriftenreihe für Vegetationskunde 38: 127-131. Bundesamt für Naturschutz, Bonn.                                                                                                                                                                                                                  |
| GER | BROT Plant Trait Database                                                | Paula, S. and J. G. Pausas. 2008. Burning seeds: germinative response to heat treatments in relation to resprouting ability. <i>Journal of Ecology</i> 96:543-552.                                                                                                                                                                                                                                                                                                                                             |
| GER | BROT Plant Trait Database                                                | Paula, S., M. Arianoutsou, D. Kazanis, Ç. Tavsanoglu, F. Lloret, C. Buhk, F. Ojeda, B. Luna, J. M. Moreno, A. Rodrigo, J. M. Espelta, S. Palacio, B. Fernández-Santos, P. M. Fernandes, and J. G. Pausas. 2009. Fire-related traits for plant species of the Mediterranean Basin. <i>Ecology</i> 90:1420.                                                                                                                                                                                                      |
| GER | Cedar Creek prairie plants (leaf, seed, dispersule, height, plant, root) | unpub.                                                                                                                                                                                                                                                                                                                                                                                                                                                                                                         |
| GER | Climbing plants trait dataset                                            | Gallagher RV, MR Leishman (2012) A global analysis of trait variation and evolution in climbing plants. <i>Journal of Biogeography</i> 39, 1757-1771. DOI: 10.1111/j.1365-2699.2012.02773.x                                                                                                                                                                                                                                                                                                                    |
| GER | Ecological Flora of the British Isles                                    | Fitter, A. H. and H. J. Peat 1994. The Ecological Flora Database. <i>Journal of Ecology</i> 82:415-425.                                                                                                                                                                                                                                                                                                                                                                                                        |
| GER | Functional traits explaining variation in plant life history strategies  | Adler PB, R Salguero-Gómez, A Compagnoni, JS Hsu, J Ray-Mukherjee, C Mbeau-Ache, M Franco (2014) Functional traits explain variation in plant life history strategies. <i>PNAS</i> 111 (2) 740-745. doi: 10.1073/pnas.1315179111                                                                                                                                                                                                                                                                               |
| GER | GLOPNET - Global Plant Trait Network Database                            | Wright, I. J., P. B. Reich, M. Westoby, D. D. Ackerly, Z. Baruch, F. Bongers, J. Cavender-Bares, T. Chapin, J. H. C. Cornelissen, M. Diemer, J. Flexas, E. Garnier, P. K. Groom, J. Gulias, K. Hikosaka, B. B. Lamont, T. Lee, W. Lee, C. Lusk, J. J. Midgley, M. L. Navas, U. Niinemets, J. Oleksyn, N. Osada, H. Poorter, P. Poot, L. Prior, V. I. Pyankov, C. Roumet, S. C. Thomas, M. G. Tjoelker, E. J. Veneklaas, and R. Villar. 2004. The worldwide leaf economics spectrum. <i>Nature</i> 428:821-827. |
| GER | GLOPNET - Global Plant Trait Network Database                            | Wright, I. J., P. B. Reich, O. K. Atkin, C. H. Lusk, M. G. Tjoelker, and M. Westoby. 2006. Irradiance, temperature and rainfall influence leaf dark respiration in woody plants: evidence from comparisons across 20 sites. <i>New Phytologist</i> 169:309-319.                                                                                                                                                                                                                                                |
| GER | Grassland Plant Trait Database                                           | Takkis, K. 2014. Changes in plant species richness and population performance in response to habitat loss and fragmentation. DISSERTATIONES BIOLOGICAE UNIVERSITATIS TARTUENSIS 255, 2014-04-07. Available from: <a href="http://hdl.handle.net/10062/39546">http://hdl.handle.net/10062/39546</a>                                                                                                                                                                                                             |

|     |                                                                                                    |                                                                                                                                                                                                                                           |
|-----|----------------------------------------------------------------------------------------------------|-------------------------------------------------------------------------------------------------------------------------------------------------------------------------------------------------------------------------------------------|
| GER | Grassland Plant Trait Database                                                                     | Takkis, K., Saar, L., Pärtel, M., Helm, A. Effect of environment and landscape on the traits of six plant species in fragmented grasslands. (in preparation)                                                                              |
| GER | Harze Trait Intravar: SLA, LDMC and Plant Height for Calcareous Grassland Species in South Belgium | unpub.                                                                                                                                                                                                                                    |
| GER | Herbs Water Relations on Soil Moisture Gradients                                                   | Sheremetev S.N. (2005) Herbs on the soil moisture gradient (water relations and the structural-functional organization). KMK, Moscow, 271 pp. (In Russian)                                                                                |
| GER | Hydrophytes Traits Database                                                                        | Pierce S., Brusa G., Sartori M. & Cerabolini B.E.L. 2012. Combined use of leaf size and economics traits allows direct comparison of hydrophyte and terrestrial herbaceous adaptive strategies. <i>Annals of Botany</i> 109(5): 1047-1053 |
| GER | Italian Alps Plant Traits Database                                                                 | Bragazza L (2009) Conservation priority of Italian alpine habitats: a floristic approach based on potential distribution of vascular plant species. <i>Biodiversity and Conservation</i> 18: 2823-2835.                                   |
| GER | Italian Alps Plant Traits Database                                                                 | Dainese M, Bragazza L (2012) Plant traits across different habitats of the Italian Alps: a comparative analysis between native and alien species. <i>Alpine Botany</i> 122: 11-21.                                                        |
| GER | KEW Seed Information Database (SID)                                                                | Royal Botanical Gardens KEW. 2008. Seed Information Database (SID). Version 7.1. Available from: <a href="http://data.kew.org/sid/">http://data.kew.org/sid/</a> (May 2008).                                                              |
| GER | KEW Seed Information Database (SID)                                                                | Royal Botanical Gardens KEW. 2008. Seed Information Database (SID). Version 7.1. Available from: <a href="http://data.kew.org/sid/">http://data.kew.org/sid/</a> (May 2011).                                                              |
| GER | Leaf Allometry Dataset                                                                             | Price, C.A. and B.J. Enquist. Scaling of mass and morphology in Dicotyledonous leaves: an extension of the WBE model. (2007) <i>Ecology</i> 88(5): 1132-1141.                                                                             |
| GER | Leaf Allometry Dataset                                                                             | Price, C.A., B.J. Enquist and V.M. Savage. A general model for allometric covariation in botanical form and function. (2007) <i>Proceedings of the National Academy of Sciences</i> 104 (32): 13204-13209.                                |
| GER | Leaf and Whole Plant Traits Database                                                               | Kazakou, E., D. Vile, B. Shipley, C. Gallet, and E. Garnier. 2006. Co-variations in litter decomposition, leaf traits and plant growth in species from a Mediterranean old-field succession. <i>Functional Ecology</i> 20:21-30.          |
| GER | Leaf and Whole Plant Traits Database                                                               | McKenna, M. F. and B. Shipley. 1999. Interacting determinants of interspecific relative growth: Empirical patterns and a theoretical explanation. <i>Ecoscience</i> 6:286-296.                                                            |
| GER | Leaf and Whole Plant Traits Database                                                               | Meziane, D. and B. Shipley. 1999. Interacting components of interspecific relative growth rate: constancy and change under differing conditions of light and nutrient supply. <i>Functional Ecology</i> 13:611-622.                       |
| GER | Leaf and Whole Plant Traits Database                                                               | Meziane, D. and B. Shipley. 1999. Interacting determinants of specific leaf area in 22 herbaceous species: effects of irradiance and nutrient availability. <i>Plant Cell and Environment</i> 22:447-459.                                 |
| GER | Leaf and Whole Plant Traits Database                                                               | Pyankov, V. I., A. V. Kondratchuk, and B. Shipley. 1999. Leaf structure and specific leaf mass: the alpine desert plants of the Eastern Pamirs, Tadjikistan. <i>New Phytologist</i> 143:131-142.                                          |
| GER | Leaf and Whole Plant Traits Database                                                               | Shipley, B. 1989. The Use of above-Ground Maximum Relative Growth-Rate as an Accurate Predictor of Whole-Plant Maximum Relative Growth-Rate. <i>Functional Ecology</i> 3:771-775.                                                         |
| GER | Leaf and Whole Plant Traits Database                                                               | Shipley, B. 1995. Structured Interspecific Determinants of Specific Leaf-Area in 34 Species of Herbaceous Angiosperms. <i>Functional Ecology</i> 9:312-319.                                                                               |



|     |                                                              |                                                                                                                                                                                                                                                     |
|-----|--------------------------------------------------------------|-----------------------------------------------------------------------------------------------------------------------------------------------------------------------------------------------------------------------------------------------------|
| GER | Leaf and Whole Plant Traits Database                         | Shipley B., 2002. Trade-offs between net assimilation rate and specific leaf area in determining relative growth rate: relationship with daily irradiance, <i>Functional Ecology</i> (16) 682-689                                                   |
| GER | Leaf and Whole Plant Traits Database                         | Shipley, B. and M. J. Lechowicz. 2000. The functional co-ordination of leaf morphology, nitrogen concentration, and gas exchange in 40 wetland species. <i>Ecoscience</i> 7:183-194.                                                                |
| GER | Leaf and Whole Plant Traits Database                         | Shipley, B. and M. Parent. 1991. Germination Responses of 64 Wetland Species in Relation to Seed Size, Minimum Time to Reproduction and Seedling Relative Growth-Rate. <i>Functional Ecology</i> 5:111-118.                                         |
| GER | Leaf and Whole Plant Traits Database                         | Shipley, B. and T. T. Vu. 2002. Dry matter content as a measure of dry matter concentration in plants and their parts. <i>New Phytologist</i> 153:359-364.                                                                                          |
| GER | Leaf and Whole Plant Traits Database                         | unpub.                                                                                                                                                                                                                                              |
| GER | Leaf and Whole Plant Traits Database                         | Vile, D. 2005. Significations fonctionnelle et ecologique des traits des especes vegetales: exemple dans une succession post-cultural mediterraneenne et generalisations, PHD Thesis.                                                               |
| GER | Leaf Area, Dry Mass and SLA Dataset                          | unpub.                                                                                                                                                                                                                                              |
| GER | Leaf Economic Traits Across Varying Environmental Conditions | Wright JP, Sutton-Grier A (2012) Does the leaf economic spectrum hold within local species pools across varying environmental conditions? <i>Functional Ecology</i> 2012 doi: 10.1111/1365-2435.12001                                               |
| GER | Leaf N-Retention Database                                    | De Vries F., Bardgett R.D. (2016) Plant community controls on short-term ecosystem nitrogen retention. <i>New Phytologist</i> . doi: 10.1111/nph.13832                                                                                              |
| GER | Leaf Physiology Database                                     | Kattge, J., W. Knorr, T. Raddatz, and C. Wirth. 2009. Quantifying photosynthetic capacity and its relationship to leaf nitrogen content for global-scale terrestrial biosphere models. <i>Global Change Biology</i> 15:976-991.                     |
| GER | Leaf Physiology Database                                     | unpub.                                                                                                                                                                                                                                              |
| GER | Leaf Structure and Economic Spectrum                         | Pierce S., Brusa G., Vagge I., Cerabolini B.E.L. (2013) Allocating CSR plant functional types: the use of leaf economics and size traits to classify woody and herbaceous vascular plants. <i>Functional Ecology</i> , 27(4): 1002-1010             |
| GER | Leaf Structure and Economic Spectrum                         | Pierce S., Ceriani R.M., De Andreis R., Luzzaro A. & Cerabolini B. 2007. The leaf economics spectrum of Poaceae reflects variation in survival strategies. <i>Plant Biosystems</i> 141(3): 337-343.                                                 |
| GER | Leaf Structure and Economic Spectrum                         | Pierce S., Luzzaro A., Caccianiga M., Ceriani R.M. & Cerabolini B. 2007. Disturbance is the principal ?-scale filter determining niche differentiation, coexistence and biodiversity in an alpine community. <i>Journal of Ecology</i> 95: 698-706. |
| GER | Leaf Structure and Economics Spectrum                        | Pierce S., Brusa G., Vagge I., Cerabolini B.E.L. (2013) Allocating CSR plant functional types: the use of leaf economics and size traits to classify woody and herbaceous vascular plants. <i>Functional Ecology</i> , 27(4): 1002-1010             |
| GER | Leaf Structure and Economics Spectrum                        | Pierce S., Ceriani R.M., De Andreis R., Luzzaro A. & Cerabolini B. 2007. The leaf economics spectrum of Poaceae reflects variation in survival strategies. <i>Plant Biosystems</i> 141(3): 337-343.                                                 |
| GER | Leaf Structure and Economics Spectrum                        | Pierce S., Luzzaro A., Caccianiga M., Ceriani R.M. & Cerabolini B. 2007. Disturbance is the principal ?-scale filter determining niche differentiation, coexistence and biodiversity in an alpine community. <i>Journal of Ecology</i> 95: 698-706. |
| GER | Leaf Structure, Venation and Economic Spectrum               | Blonder, B., Buzzard, B., Sloat, L., Simova, I., Lipson, R., Boyle, B., Enquist, B. (2012) The shrinkage effect biases estimates of paleoclimate. <i>American Journal of Botany</i> . 99.11 1756-1763                                               |



|     |                                                            |                                                                                                                                                                                                                                                                                                                                                                                                                                                                                                                                                                                                                                                                                                                   |
|-----|------------------------------------------------------------|-------------------------------------------------------------------------------------------------------------------------------------------------------------------------------------------------------------------------------------------------------------------------------------------------------------------------------------------------------------------------------------------------------------------------------------------------------------------------------------------------------------------------------------------------------------------------------------------------------------------------------------------------------------------------------------------------------------------|
| GER | Leaf Structure, Venation and Economic Spectrum             | Blonder, B., Vasseur, F., Violle, C., Shipley, B., Enquist, B., Vile, D. <i>Arabidopsis thaliana</i> rejects theories for the origin of the leaf economics spectrum. (in review, <i>New Phytologist</i> ).                                                                                                                                                                                                                                                                                                                                                                                                                                                                                                        |
| GER | Leaf Structure, Venation and Economic Spectrum             | Blonder, B., Violle, C. and Enquist, B. J. (2013) Assessing the causes and scales of the leaf economics spectrum using venation networks in <i>Populus tremuloides</i> . <i>Journal of Ecology</i> 101: 981-989. doi:10.1111/1365-2745.12102                                                                                                                                                                                                                                                                                                                                                                                                                                                                      |
| GER | Leaf Structure, Venation and Economic Spectrum             | Blonder, B., Violle, C., Patrick, L., Enquist, B. Leaf venation networks and the origin of the leaf economics spectrum. <i>Ecology Letters</i> , 2011.                                                                                                                                                                                                                                                                                                                                                                                                                                                                                                                                                            |
| GER | Leaf traits from Baltic Island species                     | Hattermann D, Elstner C, Markus Bernhardt-Römermann, Lutz Eckstein: Measurements from the project „Relative effects of local and regional factors as drivers for plant community diversity, functional trait diversity and genetic structure of species on Baltic uplift islands” funded by the German Research Foundation - DFG: BE 4143/5-1 and EC 209/12-1                                                                                                                                                                                                                                                                                                                                                     |
| GER | Leaf Traits in Central Apennines Beech Forests             | Campetella, G; Botta-Dukát, Z; Wellstein, C; Canullo, R; Gatto, S; Chelli, S; Mucina, L; Bartha, S (2011): Patterns of plant trait-environment relationships along a forest succession chronosequence. <i>Agriculture, Ecosystems &amp; Environment</i> , 145(1), 38-48. doi:10.1016/j.agee.2011.06.025                                                                                                                                                                                                                                                                                                                                                                                                           |
| GER | Leaf Traits in Central Apennines Beech Forests             | Campetella, G; Botta-Dukát, Z; Wellstein, C; Canullo, R; Gatto, S; Chelli, S; Mucina, L; Bartha, S (2011): Patterns of plant trait-environment relationships along a forest succession chronosequence. <i>Agriculture, Ecosystems &amp; Environment</i> , 145(1), 38-48. doi:10.1016/j.agee.2011.06.025                                                                                                                                                                                                                                                                                                                                                                                                           |
| GER | Leaf Traits in Italian Central Apennines Beech Forests     | Campetella, G; Botta-Dukát, Z; Wellstein, C; Canullo, R; Gatto, S; Chelli, S; Mucina, L; Bartha, S (2011): Patterns of plant trait-environment relationships along a forest succession chronosequence. <i>Agriculture, Ecosystems &amp; Environment</i> , 145(1), 38-48. doi:10.1016/j.agee.2011.06.025                                                                                                                                                                                                                                                                                                                                                                                                           |
| GER | Leaf Traits in Italian Central Apennines Beech Forests     | Campetella, G; Botta-Dukát, Z; Wellstein, C; Canullo, R; Gatto, S; Chelli, S; Mucina, L; Bartha, S (2011): Patterns of plant trait-environment relationships along a forest succession chronosequence. <i>Agriculture, Ecosystems &amp; Environment</i> , 145(1), 38-48. doi:10.1016/j.agee.2011.06.025                                                                                                                                                                                                                                                                                                                                                                                                           |
| GER | Northern mixed-grass prairie species traits - Wyoming, USA | unpub.                                                                                                                                                                                                                                                                                                                                                                                                                                                                                                                                                                                                                                                                                                            |
| GER | Nutrient Resorption Efficiency Database                    | Vergutz, L., Manzoni, S., Porporato, A., Novais, R. F., and Jackson, R. B. 2012. Global resorption efficiencies and concentrations of carbon and nutrients in leaves of terrestrial plants, <i>Ecological Monographs</i> 82:2, 205-220. doi: 10.1890/11-0416.1                                                                                                                                                                                                                                                                                                                                                                                                                                                    |
| GER | Nutrient Resorption Efficiency Database                    | Vergutz, L., S. Manzoni, A. Porporato, R.F. Novais, and R.B. Jackson. 2012. A Global Database of Carbon and Nutrient Concentrations of Green and Senesced Leaves. Data set. Available on-line [ <a href="http://daac.ornl.gov">http://daac.ornl.gov</a> ] from Oak Ridge National Laboratory Distributed Active Archive Center, Oak Ridge, Tennessee, U.S.A. <a href="http://dx.doi.org/10.3334/ORNLDAAAC/1106">http://dx.doi.org/10.3334/ORNLDAAAC/1106</a>                                                                                                                                                                                                                                                      |
| GER | Photosynthesis Traits Worldwide                            | Maire V, Ian J. Wright, I. Colin Prentice, Niels H. Batjes, Radika Bhaskar, Peter M. van Bodegom, Will K. Cornwell, David Ellsworth, Ülo Niinemets, Alejandro Ordoñez, Peter B. Reich, Louis S. Santiago (2015). Global soil and climate effects on leaf photosynthetic traits and rates. <i>Global Ecology and Biogeography</i> 24(6): 706-717. Maire V, Wright IJ, Prentice IC, Batjes NH, Bhaskar R, van Bodegom PM, Cornwell WK, Ellsworth D, Niinemets Ü, Ordoñez A, Reich PB, Santiago LS (2015) Data from: Global effects of soil and climate on leaf photosynthetic traits and rates. Dryad Digital Repository. <a href="http://dx.doi.org/10.5061/dryad.j42m7">http://dx.doi.org/10.5061/dryad.j42m7</a> |
| GER | PLANTATT - Attributes of British and Irish Plants          | HILL, M.O., PRESTON, C.D. & ROY, D.B. (2004) <i>PLANTATT</i> - attributes of British and Irish Plants: status, size, life history, geography and habitats. Huntingdon: Centre for Ecology and Hydrology.                                                                                                                                                                                                                                                                                                                                                                                                                                                                                                          |

|     |                                                                                |                                                                                                                                                                                                                                                                                                                                                                                                                                                                                                                                                                                                                        |
|-----|--------------------------------------------------------------------------------|------------------------------------------------------------------------------------------------------------------------------------------------------------------------------------------------------------------------------------------------------------------------------------------------------------------------------------------------------------------------------------------------------------------------------------------------------------------------------------------------------------------------------------------------------------------------------------------------------------------------|
| GER | Plant Coastal Dune Traits (France, Aquitaine)                                  | unpub.                                                                                                                                                                                                                                                                                                                                                                                                                                                                                                                                                                                                                 |
| GER | Plant Traits of Acidic Grasslands in Central Spain                             | Peco B., de Pablos I., Traba J. , & Levassor C. (2005) The effect of grazing abandonment on species composition and functional traits: the case of dehesa Basic and Applied Ecology, 6(2): 175-183                                                                                                                                                                                                                                                                                                                                                                                                                     |
| GER | Plant traits of grassland species                                              | La Pierre, KJ and Smith, MD. (2015) Functional trait expression of grassland species shift with short- and long-term nutrient additions. Plant Ecology 216: 307 doi:10.1007/s11258-014-0438-4                                                                                                                                                                                                                                                                                                                                                                                                                          |
| GER | Reich-Oleksyn Global Leaf N, P Database                                        | Reich, P. B., J. Oleksyn, and I. J. Wright. 2009. Leaf phosphorus influences the photosynthesis-nitrogen relation: a cross-biome analysis of 314 species. Oecologia 160:207-212.                                                                                                                                                                                                                                                                                                                                                                                                                                       |
| GER | Reproductive Allocation                                                        | Manning, Houston and Evans 2009 Basic and Applied Ecology 10, 300-308                                                                                                                                                                                                                                                                                                                                                                                                                                                                                                                                                  |
| GER | Seed Information Database (SID) Seed Mass 2010                                 | Royal Botanical Gardens KEW. Seed Information Database (SID), <a href="http://data.kew.org/sid/">http://data.kew.org/sid/</a> accessed May 2014                                                                                                                                                                                                                                                                                                                                                                                                                                                                        |
| GER | Sheffield & Spain Woody Database                                               | Castro-Diez, P., J. P. Puyravaud, and J. H. C. Cornelissen. 2000. Leaf structure and anatomy as related to leaf mass per area variation in seedlings of a wide range of woody plant species and types. Oecologia 124:476-486.                                                                                                                                                                                                                                                                                                                                                                                          |
| GER | Sheffield & Spain Woody Database                                               | Castro-Diez, P., J. P. Puyravaud, J. H. C. Cornelissen, and P. Villar-Salvador. 1998. Stem anatomy and relative growth rate in seedlings of a wide range of woody plant species and types. Oecologia 116:57-66.                                                                                                                                                                                                                                                                                                                                                                                                        |
| GER | Sheffield & Spain Woody Database                                               | Cornelissen, J.H.C. 1999. A triangular relationship between leaf size and seed size among woody species: allometry, ontogeny, ecology and taxonomy. Oecologia 118: 248-255.                                                                                                                                                                                                                                                                                                                                                                                                                                            |
| GER | Sheffield & Spain Woody Database                                               | Cornelissen, J. H. C., B. Cerabolini, P. Castro-Diez, P. Villar-Salvador, G. Montserrat-Marti, J. P. Puyravaud, M. Maestro, M. J. A. Werger, and R. Aerts. 2003. Functional traits of woody plants: correspondence of species rankings between field adults and laboratory-grown seedlings? Journal of Vegetation Science 14:311-322.                                                                                                                                                                                                                                                                                  |
| GER | Specific leaf area responses to environmental gradients through space and time | Dwyer, J. M., R. J. Hobbs, and M. M. Mayfield. 2014. Specific leaf area responses to environmental gradients through space and time. Ecology 95:399-410                                                                                                                                                                                                                                                                                                                                                                                                                                                                |
| GER | The LEDA Traitbase                                                             | Kleyer, M., R. M. Bekker, I. C. Knevel, J. P. Bakker, K. Thompson, M. Sonnenschein, P. Poschlod, J. M. van Groenendael, L. Klimes, J. Klimesova, S. Klotz, G. M. Rusch, Hermy, M. , D. Adriaens, G. Boedeltje, B. Bossuyt, A. Dannemann, P. Endels, L. Götzenberger, J. G. Hodgson, A.-K. Jackel, I. Kühn, D. Kunzmann, W. A. Ozinga, C. Römermann, M. Stadler, J. Schlegelmilch, H. J. Steendam, O. Tackenberg, B. Wilmann, J. H. C. Cornelissen, O. Eriksson, E. Garnier, and B. Peco. 2008. The LEDA Traitbase: a database of life-history traits of the Northwest European flora. Journal of Ecology 96:1266-1274. |
| GER | The Netherlands Plant Traits Database                                          | Ordonez, J. C., P. M. van Bodegom, J. P. M. Witte, R. P. Bartholomeus, H. F. van Dobben, and R. Aerts. 2010. Leaf habit and woodiness regulate different leaf economy traits at a given nutrient supply. Ecology 91:3218-3228.                                                                                                                                                                                                                                                                                                                                                                                         |
| GER | The Netherlands Plant Traits Database                                          | Ordonez, J. C., P. M. van Bodegom, J. P. M. Witte, R. P. Bartholomeus, J. R. van Hal, and R. Aerts. 2010. Plant Strategies in Relation to Resource Supply in Mesic to Wet Environments: Does Theory Mirror Nature? American Naturalist 175:225-239.                                                                                                                                                                                                                                                                                                                                                                    |
| GER | The VISTA Plant Trait Database                                                 | Fortunel, C., E. Garnier, R. Joffre, E. Kazakou, H. Quested, K. Grigulis, S. Lavorel, P. Ansquer, H. Castro, P. Cruz, J. Dolezal, O. Eriksson, H. Freitas, C. Golodets, C. Jouany, J. Kigel, M. Kleyer, V. Lehsten, J. Leps, T. Meier, R. Pakeman, M. Papadimitriou, V. P. Papanastasis, F. Quetier, M. Robson, M. Sternberg, J. P. Theau, A. Thebault, and M. Zarovali. 2009. Leaf traits capture the effects of land use changes and climate on litter decomposability of grasslands across Europe. Ecology 90:598-611.                                                                                              |

|     |                                                   |                                                                                                                                                                                                                                                                                                                                                                                                                                                                                                                                                                                                                                                     |
|-----|---------------------------------------------------|-----------------------------------------------------------------------------------------------------------------------------------------------------------------------------------------------------------------------------------------------------------------------------------------------------------------------------------------------------------------------------------------------------------------------------------------------------------------------------------------------------------------------------------------------------------------------------------------------------------------------------------------------------|
| GER | The VISTA Plant Trait Database                    | Garnier, E., S. Lavorel, P. Ansquer, H. Castro, P. Cruz, J. Dolezal, O. Eriksson, C. Fortunel, H. Freitas, C. Golodets, K. Grigulis, C. Jouany, E. Kazakou, J. Kigel, M. Kleyer, V. Lehsten, J. Leps, T. Meier, R. Pakeman, M. Papadimitriou, V. P. Papanastasis, H. Quested, F. Quetier, M. Robson, C. Roumet, G. Rusch, C. Skarpe, M. Sternberg, J.-P. Theau, A. Thebault, D. Vile, and M. P. Zarovali. 2007. Assessing the effects of land-use change on plant traits, communities and ecosystem functioning in grasslands: A standardized methodology and lessons from an application to 11 European sites. <i>Annals of Botany</i> 99:967-985. |
| GER | The VISTA Plant Trait Database                    | Pakeman, R. J., E. Garnier, S. Lavorel, P. Ansquer, H. Castro, P. Cruz, J. Dolezal, O. Eriksson, H. Freitas, C. Golodets, J. Kigel, M. Kleyer, J. Leps, T. Meier, M. Papadimitriou, V. P. Papanastasis, H. Quested, F. Quetier, G. Rusch, M. Sternberg, J. P. Theau, A. Thebault, and D. Vile. 2008. Impact of abundance weighting on the response of seed traits to climate and land use. <i>Journal of Ecology</i> 96:355-366.                                                                                                                                                                                                                    |
| GER | The VISTA Plant Trait Database                    | Pakeman, R. J., J. Leps, M. Kleyer, S. Lavorel, E. Garnier, and V. Consortium. 2009. Relative climatic, edaphic and management controls of plant functional trait signatures. <i>Journal of Vegetation Science</i> 20:148-159.                                                                                                                                                                                                                                                                                                                                                                                                                      |
| GER | The Xylem/Phloem Database                         | Schweingruber, F.H., Landolt, W.: The Xylem Database. Swiss Federal Research Institute WSL Updated (2005)                                                                                                                                                                                                                                                                                                                                                                                                                                                                                                                                           |
| GER | The Xylem/Phloem Database                         | Schweingruber, F.H., Poschlod, P. 2005: Growth rings in herbs and shrubs: Life span, age determination and stem anatomy. <i>Forest, Snow and Landscape Res.</i> 79, 195-415                                                                                                                                                                                                                                                                                                                                                                                                                                                                         |
| GER | Traits of the Hungarian flora                     | Lhotsky B., Anikó Csecserits, Bence Kovács, Zoltán Botta-Dukát: New plant trait records of the Hungarian flora                                                                                                                                                                                                                                                                                                                                                                                                                                                                                                                                      |
| GER | UV-B Radiation Sensitivity of Hieracium Pilosella | Michael Beckmann, Maria Hock, Helge Bruelheide, Alexandra Erfmeier (2012) The role of UV-B radiation in the invasion of Hieracium pilosella – A comparison of German and New Zealand plants. <i>Environmental and Experimental Botany</i> 75 173 – 180                                                                                                                                                                                                                                                                                                                                                                                              |
| GER | Wetland Dunes Database                            | Bakker, C., J. Rodenburg, and P. Bodegom. 2005. Effects of Ca- and Fe-rich seepage on P availability and plant performance in calcareous dune soils. <i>Plant and Soil</i> 275:111-122.                                                                                                                                                                                                                                                                                                                                                                                                                                                             |
| GER | Wetland Dunes Database                            | Bakker, C., P. M. Van Bodegom, H. J. M. Nelissen, W. H. O. Ernst, and R. Aerts. 2006. Plant responses to rising water tables and nutrient management in calcareous dune slacks. <i>Plant Ecology</i> 185:19-28.                                                                                                                                                                                                                                                                                                                                                                                                                                     |
| GER | Wetland Dunes Database                            | unpub.                                                                                                                                                                                                                                                                                                                                                                                                                                                                                                                                                                                                                                              |
| GER | Wetland Dunes Database                            | van Bodegom, P. M., B. K. Sorrell, A. Oosthoek, C. Bakke, and R. Aerts. 2008. Separating the effects of partial submergence and soil oxygen demand on plant physiology. <i>Ecology</i> 89:193-204.                                                                                                                                                                                                                                                                                                                                                                                                                                                  |
| GER | Wetland Dunes Database                            | van Bodegom, P. M., M. de Kanter, C. Bakker, and R. Aerts. 2005. Radial oxygen loss, a plastic property of dune slack plant species. <i>Plant and Soil</i> 271:351-364.                                                                                                                                                                                                                                                                                                                                                                                                                                                                             |
| GER | Whole Plant Hydraulic Conductance                 | MENCUCCINI M., 2003. The ecological significance of long distance water transport: short-term regulation and long-term acclimation across plant growth forms. <i>Plant, Cell and Environment</i> , 26:163-182.                                                                                                                                                                                                                                                                                                                                                                                                                                      |
| USA | ArtDeco Database                                  | Cornwell, W. K., J. H. C. Cornelissen, K. Amatangelo, E. Dorrepaal, V. T. Eviner, O. Godoy, S. E. Hobbie, B. Hoorens, H. Kurokawa, N. Pérez-Harguindeguy, H. M. Quested, L. S. Santiago, D. A. Wardle, I. J. Wright, R. Aerts, S. D. Allison, P. van Bodegom, V. Brovkin, A. Chatain, T. V. Callaghan, S. Díaz, E. Garnier, D. E. Gurvich, E. Kazakou, J. A. Klein, J. Read, P. B. Reich, N. A. Soudzilovskaia, M. V. Vaieretti, and M. Westoby. 2008. Plant species traits are the predominant control on litter decomposition rates within biomes worldwide. <i>Ecology Letters</i> 11:1065-1071.                                                 |
| USA | BiolFlor Database                                 | Briemle, G., Nitsche, S. & Nitsche, L. (2002): Nutzungswertzahlen für Gefäßpflanzen des Grünlandes. In: Klotz, S., Kühn, I. & Durka, W. [eds.]: BIOLFLOR - Eine Datenbank zu biologisch-ökologischen Merkmalen der Gefäßpflanzen in Deutschland. -Schriftenreihe für Vegetationskunde 38. Bundesamt für Naturschutz, Bonn.                                                                                                                                                                                                                                                                                                                          |
| USA | BiolFlor Database                                 | Durka, W. (2002): Blüten- und Reproduktionsbiologie. In: Klotz, S., Kühn, I. & Durka, W. [eds.]: BIOLFLOR - Eine Datenbank zu biologisch-ökologischen Merkmalen der Gefäßpflanzen in Deutschland. - Schriftenreihe für Vegetationskunde 38: 133-175.                                                                                                                                                                                                                                                                                                                                                                                                |

|     |                           |                                                                                                                                                                                                                                                                                                                           |
|-----|---------------------------|---------------------------------------------------------------------------------------------------------------------------------------------------------------------------------------------------------------------------------------------------------------------------------------------------------------------------|
|     |                           | Bundesamt für Naturschutz, Bonn.                                                                                                                                                                                                                                                                                          |
| USA | BiolFlor Database         | Durka, W. (2002): Chromosomenzahlen, Ploidiestufen und DNA-Gehalte. In: Klotz, S., Kühn, I. & Durka, W. [eds.]: BIOLFLORE - Eine Datenbank zu biologisch-ökologischen Merkmalen der Gefäßpflanzen in Deutschland. - Schriftenreihe für Vegetationskunde 38. Bundesamt für Naturschutz, Bonn.                              |
| USA | BiolFlor Database         | Durka, W. (2002) Phylogenie der Farn- und Blütenpflanzen Deutschlands. - In: Klotz, S., Kühn, I. & Durka, W. [Hrsg.]: BIOLFLORE - Eine Datenbank zu biologisch-ökologischen Merkmalen der Gefäßpflanzen in Deutschland. - Schriftenreihe für Vegetationskunde 38: 75-91. Bundesamt für Naturschutz, Bonn.                 |
| USA | BiolFlor Database         | Klotz, S. & Kühn, I. (2002): Blattmerkmale. - In: Klotz, S., Kühn, I. & Durka, W. [Hrsg.]: BIOLFLORE - Eine Datenbank zu biologisch-ökologischen Merkmalen der Gefäßpflanzen in Deutschland. - Schriftenreihe für Vegetationskunde 38: 119-126. Bundesamt für Naturschutz, Bonn.                                          |
| USA | BiolFlor Database         | Klotz, S. & Kühn, I. (2002): Indikatoren zum anthropogenen Einfluss auf die Vegetation. In: Klotz, S., Kühn, I. & Durka, W. [eds.]: BIOLFLORE - Eine Datenbank zu biologisch-ökologischen Merkmalen der Gefäßpflanzen in Deutschland. - Schriftenreihe für Vegetationskunde 38: 241-246. Bundesamt für Naturschutz, Bonn. |
| USA | BiolFlor Database         | Klotz, S. & Kühn, I. (2002): Ökologische Strategietypen. - In: Klotz, S., Kühn, I. & Durka, W. [Hrsg.]: BIOLFLORE - Eine Datenbank zu biologisch-ökologischen Merkmalen der Gefäßpflanzen in Deutschland. - Schriftenreihe für Vegetationskunde 38: 197-201. Bundesamt für Naturschutz, Bonn.                             |
| USA | BiolFlor Database         | Klotz, S. & Kühn, I. (2002): Soziologische Bindung der Arten. In: Klotz, S., Kühn, I. & Durka, W. [eds.]: BIOLFLORE - Eine Datenbank zu biologisch-ökologischen Merkmalen der Gefäßpflanzen in Deutschland. - Schriftenreihe für Vegetationskunde 38: 273-281. Bundesamt für Naturschutz, Bonn.                           |
| USA | BiolFlor Database         | Krumbiegel, A. (2002): Morphologie der vegetativen Organe (außer Blätter). In: Klotz, S., Kühn, I. & Durka, W. [eds.]: BIOLFLORE - Eine Datenbank zu biologisch-ökologischen Merkmalen der Gefäßpflanzen in Deutschland. - Schriftenreihe für Vegetationskunde 38: 93-118. Bundesamt für Naturschutz, Bonn.               |
| USA | BiolFlor Database         | Kühn, I. Klotz, S. (2002): Angaben zu den Arealen. In: Klotz, S., Kühn, I. & Durka, W. [eds.]: BIOLFLORE - Eine Datenbank zu biologisch-ökologischen Merkmalen der Gefäßpflanzen in Deutschland. - Schriftenreihe für Vegetationskunde 38: 227-239. Bundesamt für Naturschutz, Bonn.                                      |
| USA | BiolFlor Database         | Kühn, I., Klotz, S. (2002): Floristischer Status und gebietsfremde Arten. In: Klotz, S., Kühn, I. & Durka, W. [eds.]: BIOLFLORE - Eine Datenbank zu biologisch-ökologischen Merkmalen der Gefäßpflanzen in Deutschland. - Schriftenreihe für Vegetationskunde 38: 47-56. Bundesamt für Naturschutz, Bonn.                 |
| USA | BiolFlor Database         | Kühn, I., W. Durka, and S. Klotz. 2004. BiolFlor - a new plant-trait database as a tool for plant invasion ecology. <i>Diversity and Distribution</i> 10 363-365.                                                                                                                                                         |
| USA | BiolFlor Database         | Otto, B. (2002): Merkmale von Samen, Früchten, generativen Germinulen und generativen Diasporen. In: Klotz, S., Kühn, I. & Durka, W. [eds.]: BIOLFLORE - Eine Datenbank zu biologisch-ökologischen Merkmalen der Gefäßpflanzen in Deutschland. - Schriftenreihe für Vegetationskunde 38. Bundesamt für Naturschutz, Bonn. |
| USA | BiolFlor Database         | Trefflich, A., Klotz, S. & Kühn, I. (2002): Blühphänologie. In: Klotz, S., Kühn, I. & Durka, W. [eds.]: BIOLFLORE - Eine Datenbank zu biologisch-ökologischen Merkmalen der Gefäßpflanzen in Deutschland. - Schriftenreihe für Vegetationskunde 38: 127-131. Bundesamt für Naturschutz, Bonn.                             |
| USA | BROT Plant Trait Database | Paula, S. and J. G. Pausas. 2008. Burning seeds: germinative response to heat treatments in relation to resprouting ability. <i>Journal of Ecology</i> 96:543-552.                                                                                                                                                        |
| USA | BROT Plant Trait Database | Paula, S., M. Arianoutsou, D. Kazanis, Ç. Tavsanoğlu, F. Lloret, C. Buhk, F. Ojeda, B. Luna, J. M. Moreno, A. Rodrigo, J. M. Espelta, S. Palacio, B. Fernández-Santos, P. M. Fernandes, and J. G. Pausas. 2009. Fire-related traits for plant species of the Mediterranean Basin. <i>Ecology</i> 90:1420.                 |

|     |                                                                            |                                                                                                                                                                                                                                                                                                                                                                                                                                                                                                                |
|-----|----------------------------------------------------------------------------|----------------------------------------------------------------------------------------------------------------------------------------------------------------------------------------------------------------------------------------------------------------------------------------------------------------------------------------------------------------------------------------------------------------------------------------------------------------------------------------------------------------|
| USA | California Coastal Grassland Database                                      | Sandel B., J. D. Corbin, and M. Krupa 2011. Using plant functional traits to guide restoration: A case study in California coastal grassland. <i>Ecosphere</i> 2:art23. <a href="http://d">http://d</a>                                                                                                                                                                                                                                                                                                        |
| USA | Cedar Creek Savanna SLA, C, N Database                                     | Willis, C. G., M. Halina, C. Lehman, P. B. Reich, A. Keen, S. McCarthy, and J. Cavender-Bares. 2010. Phylogenetic community structure in Minnesota oak savanna is influenced by spatial extent and environmental variation. <i>Ecography</i> 33:565-577.                                                                                                                                                                                                                                                       |
| USA | Cold Tolerance, Seed Size and Height of North American Forest Tree Species | unpub.                                                                                                                                                                                                                                                                                                                                                                                                                                                                                                         |
| USA | ECOCRAFT                                                                   | Medlyn, B. E. and P. G. Jarvis. 1999. Design and use of a database of model parameters from elevated [CO <sub>2</sub> ] experiments. <i>Ecological Modelling</i> 124:69-83.                                                                                                                                                                                                                                                                                                                                    |
| USA | ECOCRAFT                                                                   | Medlyn, B. E., C. V. M. Barton, M. S. J. Broadmeadow, R. Ceulemans, P. DeAngelis, M. Forstreuter, M. Freeman, S. B. Jackson, S. Kellomaeki, E. Laitat, A. Rey, P. Roberntz, B. D. Sigurdsson, J. Strassemeier, K. Wang, P. S. Curtis, and P. G. Jarvis. 2001. Stomatal Conductance of forest species after long-term exposure to elevated CO <sub>2</sub> concentration: a synthesis. <i>New Phytologist</i> 149:247--264.                                                                                     |
| USA | ECOCRAFT                                                                   | Medlyn, B. E., F.-W. Badeck, D. G. G. De Pury, C. V. M. Barton, M. Broadmeadow, R. Ceulemans, P. De Angelis, M. Forstreuter, M. E. Jach, S. Kellomäki, E. Laitat, M. Marek, S. Philippot, A. Rey, J. Strassemeier, K. Laitinen, R. Liozon, B. Portier, P. Roberntz, K. Wang, and P. G. Jarvis. 1999. Effects of elevated CO <sub>2</sub> on photosynthesis in European forest species: a meta-analysis of model parameters. <i>Plant, Cell and Environment</i> 22:1475-1495.                                   |
| USA | Floridian Leaf Traits Database                                             | Cavender-Bares, J., A. Keen, and B. Miles. 2006. Phylogenetic structure of floridian plant communities depends on taxonomic and spatial scale. <i>Ecology</i> 87:S109-S122.                                                                                                                                                                                                                                                                                                                                    |
| USA | Functional traits explaining variation in plant life history strategies    | Adler PB, R Salguero-Gómez, A Compagnoni, JS Hsu, J Ray-Mukherjee, C Mbeau-Ache, M Franco (2014) Functional traits explain variation in plant life history strategies. <i>PNAS</i> 111 (2) 740-745. doi: 10.1073/pnas.1315179111                                                                                                                                                                                                                                                                               |
| USA | Functional Traits of Graminoids in Semi-Arid Steppes Database              | Peter B. Adler (2003) A comparison of livestock grazing effects on sagebrush steppe, USA, and Patagonian steppe, Argentina. PhD Thesis, Colorado State University                                                                                                                                                                                                                                                                                                                                              |
| USA | Functional Traits of Graminoids in Semi-Arid Steppes Database              | PETER B. ADLER, DANIEL G. MILCHUNAS, WILLIAM K. LAUENROTH, OSVALDO E. SALA and INGRID C. BURKE (2004) Functional traits of graminoids in semi-arid steppes: a test of grazing histories. <i>Journal of Applied Ecology</i> 2004 41, 653–663                                                                                                                                                                                                                                                                    |
| USA | Global 15N Database                                                        | Craine, J. M., A. J. Elmore, M. P. M. Aidar, M. Bustamante, T. E. Dawson, E. A. Hobbie, A. Kahmen, M. C. Mack, K. K. McLauchlan, A. Michelsen, G. B. Nardoto, L. H. Pardo, J. Penuelas, P. B. Reich, E. A. G. Schuur, W. D. Stock, P. H. Templer, R. A. Virginia, J. M. Welker, and I. J. Wright. 2009. Global patterns of foliar nitrogen isotopes and their relationships with climate, mycorrhizal fungi, foliar nutrient concentrations, and nitrogen availability. <i>New Phytologist</i> 183:980-992.    |
| USA | Global A, N, P, SLA Database                                               | Reich, P. B., J. Oleksyn, and I. J. Wright. 2009. Leaf phosphorus influences the photosynthesis-nitrogen relation: a cross-biome analysis of 314 species. <i>Oecologia</i> 160:207-212.                                                                                                                                                                                                                                                                                                                        |
| USA | GLOPNET - Global Plant Trait Network Database                              | Wright, I. J., P. B. Reich, M. Westoby, D. D. Ackerly, Z. Baruch, F. Bongers, J. Cavender-Bares, T. Chapin, J. H. C. Cornelissen, M. Diemer, J. Flexas, E. Garnier, P. K. Groom, J. Gulias, K. Hikosaka, B. B. Lamont, T. Lee, W. Lee, C. Lusk, J. J. Midgley, M. L. Navas, U. Niinemets, J. Oleksyn, N. Osada, H. Poorter, P. Poot, L. Prior, V. I. Pyankov, C. Roumet, S. C. Thomas, M. G. Tjoelker, E. J. Veneklaas, and R. Villar. 2004. The worldwide leaf economics spectrum. <i>Nature</i> 428:821-827. |



|     |                                                                             |                                                                                                                                                                                                                                                                                                    |
|-----|-----------------------------------------------------------------------------|----------------------------------------------------------------------------------------------------------------------------------------------------------------------------------------------------------------------------------------------------------------------------------------------------|
| USA | GLOPNET - Global Plant Trait Network Database                               | Wright, I. J., P. B. Reich, O. K. Atkin, C. H. Lusk, M. G. Tjoelker, and M. Westoby. 2006. Irradiance, temperature and rainfall influence leaf dark respiration in woody plants: evidence from comparisons across 20 sites. <i>New Phytologist</i> 169:309-319.                                    |
| USA | Grassland Plant Trait Database                                              | Takkis, K. 2014. Changes in plant species richness and population performance in response to habitat loss and fragmentation. DISSERTATIONES BIOLOGICAE UNIVERSITATIS TARTUENSIS 255, 2014-04-07. Available from: <a href="http://hdl.handle.net/10062/39546">http://hdl.handle.net/10062/39546</a> |
| USA | Grassland Plant Trait Database                                              | Takkis, K., Saar, L., Pärtel, M., Helm, A. Effect of environment and landscape on the traits of six plant species in fragmented grasslands. (in preparation)                                                                                                                                       |
| USA | Herbs Water Relations on Soil Moisture Gradients                            | Sheremetev S.N. (2005) Herbs on the soil moisture gradient (water relations and the structural-functional organization). KMK, Moscow, 271 pp. (In Russian)                                                                                                                                         |
| USA | Jasper Ridge leaf chemistry data                                            | Dahlin KM, Asner GP & CB Field (2013) Environmental and community controls on plant canopy chemistry in a Mediterranean-type ecosystem. <i>Proceedings of the National Academy of Sciences USA</i> . 110(17): 6895-6900                                                                            |
| USA | KEW Seed Information Database (SID)                                         | Royal Botanical Gardens KEW. 2008. Seed Information Database (SID). Version 7.1. Available from: <a href="http://data.kew.org/sid/">http://data.kew.org/sid/</a> (May 2008).                                                                                                                       |
| USA | KEW Seed Information Database (SID)                                         | Royal Botanical Gardens KEW. 2008. Seed Information Database (SID). Version 7.1. Available from: <a href="http://data.kew.org/sid/">http://data.kew.org/sid/</a> (May 2011).                                                                                                                       |
| USA | Leaf Area, Dry Mass and SLA Dataset                                         | unpub.                                                                                                                                                                                                                                                                                             |
| USA | Leaf economics spectrum and venation networks in <i>Populus tremuloides</i> | Blonder, B., Violle, C. and Enquist, B. J. (2013) Assessing the causes and scales of the leaf economics spectrum using venation networks in <i>Populus tremuloides</i> . <i>Journal of Ecology</i> 101: 981–989. doi:10.1111/1365-2745.12102                                                       |
| USA | Leaf Economic Traits Across Varying Environmental Conditions                | Wright JP, Sutton-Grier A (2012) Does the leaf economic spectrum hold within local species pools across varying environmental conditions? <i>Functional Ecology</i> 2012 doi: 10.1111/1365-2435.12001                                                                                              |
| USA | Leaf N-Retention Database                                                   | De Vries F., Bardgett R.D. (2016) Plant community controls on short-term ecosystem nitrogen retention. <i>New Phytologist</i> . doi: 10.1111/nph.13832                                                                                                                                             |
| USA | Leaf Photosynthesis and Nitrogen at Oak Ridge Dataset                       | WILSON K, D BALDOCCHI, P HANSON (2000) Spatial and seasonal variability of photosynthetic parameters and their relationship to leaf nitrogen in a deciduous forest. <i>Tree Physiology</i> 20, 565–578                                                                                             |
| USA | Leaf Structure and Chemistry                                                | Auger, S. 2012. MSc thesis, Université de Sherbrooke, Sherbrooke (Quebec) L'importance de la variabilité interspécifique des traits fonctionnels par rapport à la variabilité intraspécifique chez les jeunes arbres en forêt mature.                                                              |
| USA | Leaf Structure and Chemistry                                                | Auger, S., Shipley, B. (2012). : Interspecific and intraspecific trait variation along short environmental gradients in an old-growth temperate forest. <i>Journal of Vegetation Science</i> . DOI: 1111/j.1654-1103.2012.01473.x                                                                  |
| USA | Leaf Structure and Economics Spectrum                                       | Pierce S., Brusa G., Vagge I., Cerabolini B.E.L. (2013) Allocating CSR plant functional types: the use of leaf economics and size traits to classify woody and herbaceous vascular plants. <i>Functional Ecology</i> , 27(4): 1002-1010                                                            |
| USA | Leaf Structure and Economics Spectrum                                       | Pierce S., Ceriani R.M., De Andreis R., Luzzaro A. & Cerabolini B. 2007. The leaf economics spectrum of Poaceae reflects variation in survival strategies. <i>Plant Biosystems</i> 141(3): 337-343.                                                                                                |

|     |                                                              |                                                                                                                                                                                                                                                                                                                                                                                                                                                                                                                                                                                                                                                                                                                   |
|-----|--------------------------------------------------------------|-------------------------------------------------------------------------------------------------------------------------------------------------------------------------------------------------------------------------------------------------------------------------------------------------------------------------------------------------------------------------------------------------------------------------------------------------------------------------------------------------------------------------------------------------------------------------------------------------------------------------------------------------------------------------------------------------------------------|
| USA | Leaf Structure and Economics Spectrum                        | Pierce S., Luzzaro A., Caccianiga M., Ceriani R.M. & Cerabolini B. 2007. Disturbance is the principal $\alpha$ -scale filter determining niche differentiation, coexistence and biodiversity in an alpine community. <i>Journal of Ecology</i> 95: 698-706.                                                                                                                                                                                                                                                                                                                                                                                                                                                       |
| USA | Leaf Structure, Venation and Economic Spectrum               | Blonder, B., Buzzard, B., Sloat, L., Simova, I., Lipson, R., Boyle, B., Enquist, B. (2012) The shrinkage effect biases estimates of paleoclimate. <i>American Journal of Botany</i> . 99.11 1756-1763                                                                                                                                                                                                                                                                                                                                                                                                                                                                                                             |
| USA | Leaf Structure, Venation and Economic Spectrum               | Blonder, B., Vasseur, F., Violle, C., Shipley, B., Enquist, B., Vile, D. <i>Arabidopsis thaliana</i> rejects theories for the origin of the leaf economics spectrum. (in review, <i>New Phytologist</i> )                                                                                                                                                                                                                                                                                                                                                                                                                                                                                                         |
| USA | Leaf Structure, Venation and Economic Spectrum               | Blonder, B., Violle, C. and Enquist, B. J. (2013) Assessing the causes and scales of the leaf economics spectrum using venation networks in <i>Populus tremuloides</i> . <i>Journal of Ecology</i> 101: 981–989. doi:10.1111/1365-2745.12102                                                                                                                                                                                                                                                                                                                                                                                                                                                                      |
| USA | Leaf Structure, Venation and Economic Spectrum               | Blonder, B., Violle, C., Patrick, L., Enquist, B. Leaf venation networks and the origin of the leaf economics spectrum. <i>Ecology Letters</i> , 2011                                                                                                                                                                                                                                                                                                                                                                                                                                                                                                                                                             |
| USA | Midwestern and Southern US Herbaceous Species Trait Database | unpub.                                                                                                                                                                                                                                                                                                                                                                                                                                                                                                                                                                                                                                                                                                            |
| USA | New York Old Field Plant Traits Database                     | Siefert, A. 2012. Spatial patterns of functional divergence in old-field plant communities. <i>Oikos</i> 121: 907-914                                                                                                                                                                                                                                                                                                                                                                                                                                                                                                                                                                                             |
| USA | Northern mixed-grass prairie species traits - Wyoming, USA   | unpub.                                                                                                                                                                                                                                                                                                                                                                                                                                                                                                                                                                                                                                                                                                            |
| USA | Old fields of Eastern US (Siefert Data)                      | Siefert, A., Fridley, J.D., and Ritchie, M.E. 2014. Community functional responses to soil and climate at multiple spatial scales: when does intraspecific variation matter? <i>PLOS ONE</i> 9: e111189                                                                                                                                                                                                                                                                                                                                                                                                                                                                                                           |
| USA | Photosynthesis and Leaf Characteristics Database             | unpub.                                                                                                                                                                                                                                                                                                                                                                                                                                                                                                                                                                                                                                                                                                            |
| USA | Photosynthesis Traits Worldwide                              | Maire V, Ian J. Wright, I. Colin Prentice, Niels H. Batjes, Radika Bhaskar, Peter M. van Bodegom, Will K. Cornwell, David Ellsworth, Ülo Niinemets, Alejandro Ordoñez, Peter B. Reich, Louis S. Santiago (2015). Global soil and climate effects on leaf photosynthetic traits and rates. <i>Global Ecology and Biogeography</i> 24(6): 706-717. Maire V, Wright IJ, Prentice IC, Batjes NH, Bhaskar R, van Bodegom PM, Cornwell WK, Ellsworth D, Niinemets Ü, Ordoñez A, Reich PB, Santiago LS (2015) Data from: Global effects of soil and climate on leaf photosynthetic traits and rates. Dryad Digital Repository. <a href="http://dx.doi.org/10.5061/dryad.j42m7">http://dx.doi.org/10.5061/dryad.j42m7</a> |
| USA | Plant Traits for Pinus and Juniperus Forests in Arizona      | Laughlin, D. C., J. J. Leppert, M. M. Moore, and C. H. Sieg. 2010. A multi-trait test of the leaf-height-seed plant strategy scheme with 133 species from a pine forest flora. <i>Functional Ecology</i> 24:493-501.                                                                                                                                                                                                                                                                                                                                                                                                                                                                                              |
| USA | Plant Traits for Pinus and Juniperus Forests in Arizona      | Laughlin, D.C., P.Z. Fulé, D.W. Huffman, J. Crouse, and E. Laliberte. 2011. Climatic constraints on trait-based forest assembly. <i>Journal of Ecology</i> 99:1489-1499.                                                                                                                                                                                                                                                                                                                                                                                                                                                                                                                                          |

|     |                                                                |                                                                                                                                                                                                                                                                                                                                                                                                                                                                                                                                                                                                                                                     |
|-----|----------------------------------------------------------------|-----------------------------------------------------------------------------------------------------------------------------------------------------------------------------------------------------------------------------------------------------------------------------------------------------------------------------------------------------------------------------------------------------------------------------------------------------------------------------------------------------------------------------------------------------------------------------------------------------------------------------------------------------|
| USA | Plant Traits of Canadian Forests                               | Bond-Lamberty, B., C. Wang, and S. T. Gower (2002), Above- and belowground biomass and sapwood area allometric equations for six boreal tree species of northern Manitoba, <i>Can. J. For. Res.</i> , 32(8), 1441-1450.                                                                                                                                                                                                                                                                                                                                                                                                                             |
| USA | Plant Traits of Canadian Forests                               | Bond-Lamberty, B., C. Wang, and S. T. Gower (2002), Leaf area dynamics of a boreal black spruce fire chronosequence, <i>Tree Physiol.</i> , 22(14), 993-1001.                                                                                                                                                                                                                                                                                                                                                                                                                                                                                       |
| USA | Plant Traits of Canadian Forests                               | Bond-Lamberty, B., C. Wang, and S. T. Gower (2003), The use of multiple measurement techniques to refine estimates of conifer needle geometry, <i>Can. J. For. Res.</i> , 33(1), 101-105.                                                                                                                                                                                                                                                                                                                                                                                                                                                           |
| USA | Plant Traits of Canadian Forests                               | Bond-Lamberty, B., C. Wang, and S.T. Gower (2004), Net primary production and net ecosystem production of a boreal black spruce fire chronosequence, <i>Global Change Biol.</i> , 10(4), 473-487.                                                                                                                                                                                                                                                                                                                                                                                                                                                   |
| USA | Plant traits of grassland species                              | La Pierre, KJ and Smith, MD. (2015) Functional trait expression of grassland species shift with short- and long-term nutrient additions. <i>Plant Ecology</i> 216: 307 doi:10.1007/s11258-014-0438-4                                                                                                                                                                                                                                                                                                                                                                                                                                                |
| USA | Reich-Oleksyn Global Leaf N, P Database                        | Reich, P. B., J. Oleksyn, and I. J. Wright. 2009. Leaf phosphorus influences the photosynthesis-nitrogen relation: a cross-biome analysis of 314 species. <i>Oecologia</i> 160:207-212.                                                                                                                                                                                                                                                                                                                                                                                                                                                             |
| USA | Reproductive Allocation                                        | Manning, Houston and Evans 2009 <i>Basic and Applied Ecology</i> 10, 300-308                                                                                                                                                                                                                                                                                                                                                                                                                                                                                                                                                                        |
| USA | Rocky Mountain Biological Laboratory WSR/gradient plant traits | unpub.                                                                                                                                                                                                                                                                                                                                                                                                                                                                                                                                                                                                                                              |
| USA | Seed Information Database (SID) Seed Mass 2010                 | Royal Botanical Gardens KEW. Seed Information Database (SID), <a href="http://data.kew.org/sid/">http://data.kew.org/sid/</a> accessed May 2014                                                                                                                                                                                                                                                                                                                                                                                                                                                                                                     |
| USA | The LEDA Traitbase                                             | Kleyer, M., R. M. Bekker, I. C. Knevel, J. P. Bakker, K. Thompson, M. Sonnenschein, P. Poschlod, J. M. van Groenendael, L. Klimes, J. Klimesova, S. Klotz, G. M. Rusch, Hermy, M., D. Adriaens, G. Boedeltje, B. Bossuyt, A. Dannemann, P. Endels, L. Götzenberger, J. G. Hodgson, A.-K. Jackel, I. Kühn, D. Kunzmann, W. A. Ozinga, C. Römermann, M. Stadler, J. Schlegelmilch, H. J. Steendam, O. Tackenberg, B. Wilmann, J. H. C. Cornelissen, O. Eriksson, E. Garnier, and B. Peco. 2008. The LEDA Traitbase: a database of life-history traits of the Northwest European flora. <i>Journal of Ecology</i> 96:1266-1274.                        |
| USA | The VISTA Plant Trait Database                                 | Fortunel, C., E. Garnier, R. Joffre, E. Kazakou, H. Quested, K. Grigulis, S. Lavorel, P. Ansquer, H. Castro, P. Cruz, J. Dolezal, O. Eriksson, H. Freitas, C. Golodets, C. Jouany, J. Kigel, M. Kleyer, V. Lehsten, J. Leps, T. Meier, R. Pakeman, M. Papadimitriou, V. P. Papanastasis, F. Quetier, M. Robson, M. Sternberg, J. P. Theau, A. Thebault, and M. Zarovali. 2009. Leaf traits capture the effects of land use changes and climate on litter decomposability of grasslands across Europe. <i>Ecology</i> 90:598-611.                                                                                                                    |
| USA | The VISTA Plant Trait Database                                 | Garnier, E., S. Lavorel, P. Ansquer, H. Castro, P. Cruz, J. Dolezal, O. Eriksson, C. Fortunel, H. Freitas, C. Golodets, K. Grigulis, C. Jouany, E. Kazakou, J. Kigel, M. Kleyer, V. Lehsten, J. Leps, T. Meier, R. Pakeman, M. Papadimitriou, V. P. Papanastasis, H. Quested, F. Quetier, M. Robson, C. Roumet, G. Rusch, C. Skarpe, M. Sternberg, J.-P. Theau, A. Thebault, D. Vile, and M. P. Zarovali. 2007. Assessing the effects of land-use change on plant traits, communities and ecosystem functioning in grasslands: A standardized methodology and lessons from an application to 11 European sites. <i>Annals of Botany</i> 99:967-985. |
| USA | The VISTA Plant Trait Database                                 | Pakeman, R. J., E. Garnier, S. Lavorel, P. Ansquer, H. Castro, P. Cruz, J. Dolezal, O. Eriksson, H. Freitas, C. Golodets, J. Kigel, M. Kleyer, J. Leps, T. Meier, M. Papadimitriou, V. P. Papanastasis, H. Quested, F. Quetier, G. Rusch, M. Sternberg, J. P. Theau, A. Thebault, and D. Vile. 2008. Impact of abundance weighting on the response of seed traits to climate and land use. <i>Journal of Ecology</i> 96:355-366.                                                                                                                                                                                                                    |
| USA | The VISTA Plant Trait Database                                 | Pakeman, R. J., J. Leps, M. Kleyer, S. Lavorel, E. Garnier, and V. Consortium. 2009. Relative climatic, edaphic and management controls of plant functional trait signatures. <i>Journal of Vegetation Science</i> 20:148-159.                                                                                                                                                                                                                                                                                                                                                                                                                      |



55

|     |                                 |        |
|-----|---------------------------------|--------|
| USA | Tundra Plant<br>Traits Database | unpub. |
|-----|---------------------------------|--------|

350

56

351 **Figure S12.** PCA of plant species and their traits for German and US comparison.

352 Each point represents the traits of a single species in the German or US dataset. For obvious outliers,  
353 the ability of each species to score such extreme values was individually confirmed e.g. by checking  
354 that certain species have unusually large leaf area or leaf nitrogen content. Note that since most of the  
355 calculated community properties are relative-abundance weighted, these single outliers do not  
356 necessarily have significant impact on the community properties of a given plant community.

357

358 Germany:

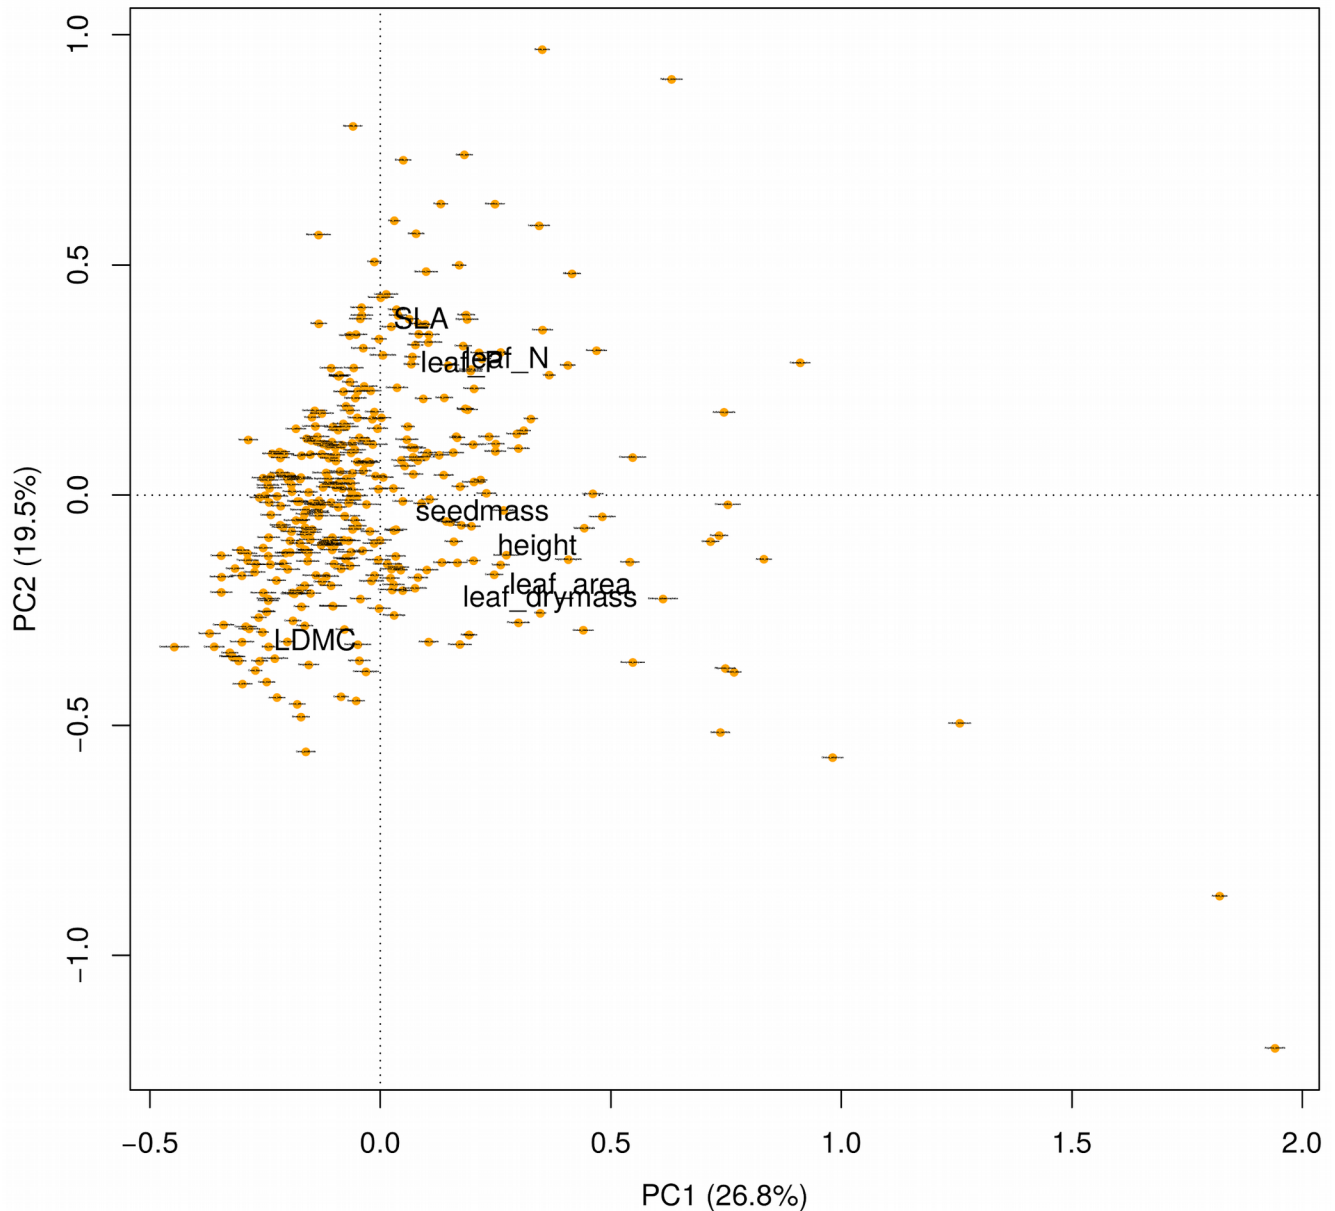

359

360

361

362

363

364

365

57  
366 USA:

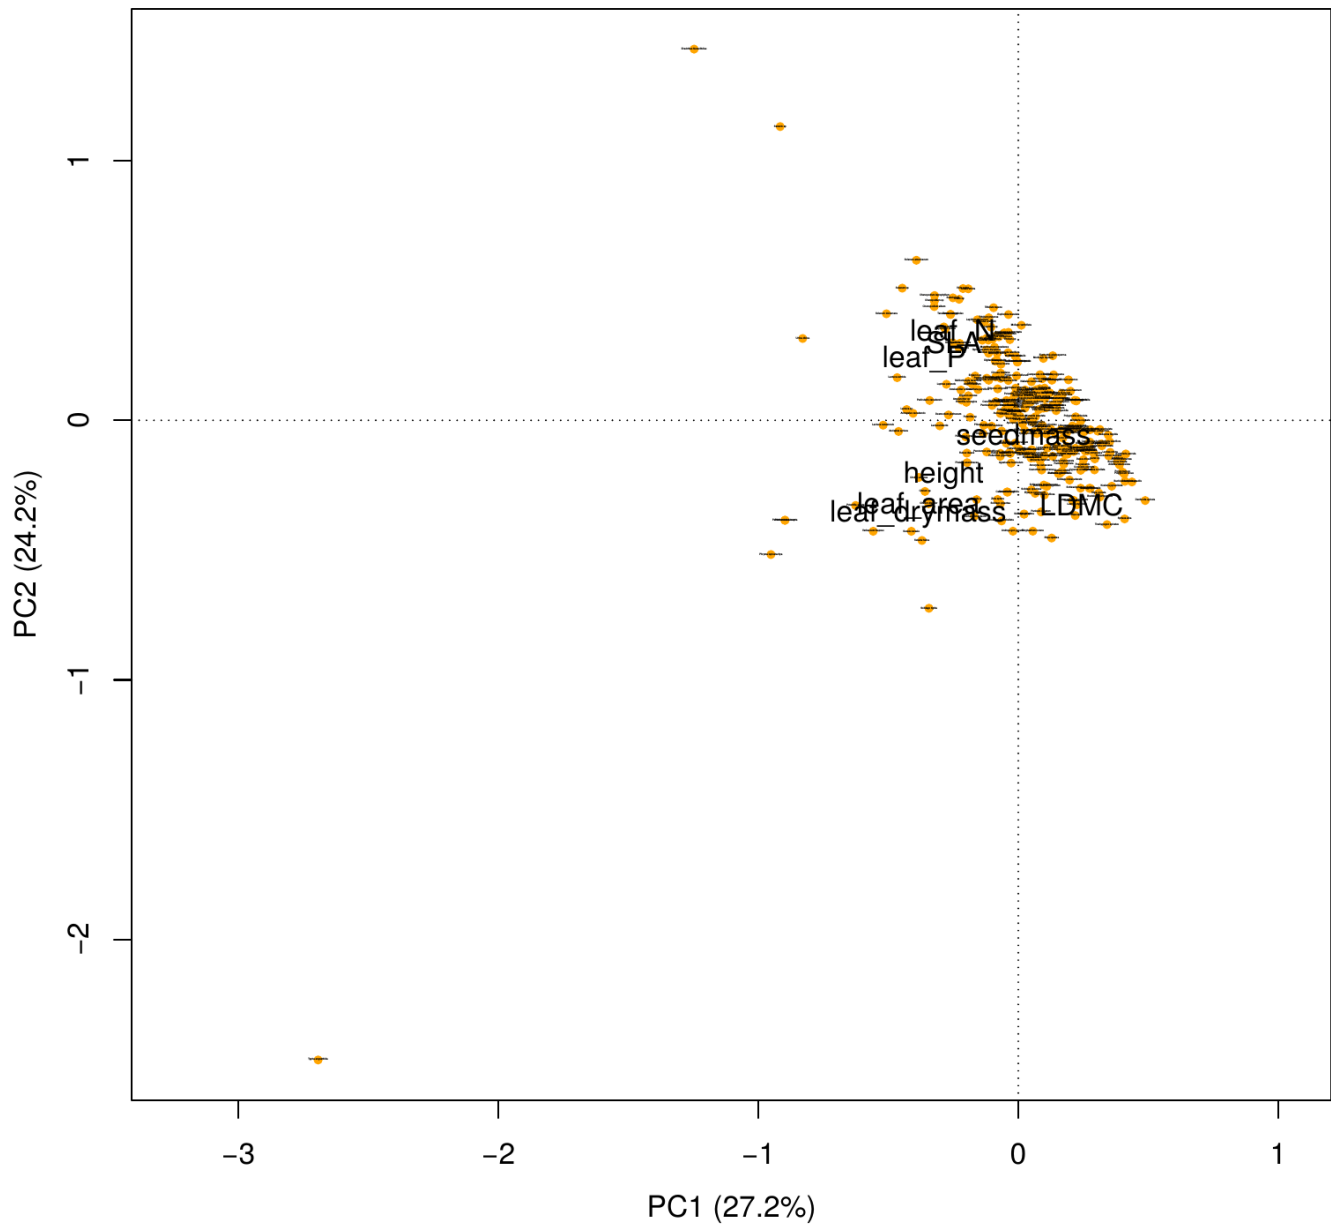

367

58

368 **Table S16.** Species with altered trait values to avoid Gower dissimilarity zeros.

369 Species are sorted by region (GER=Germany, US=USA) and by the percentage shift that their trait  
370 values were subject to. In two cases in the US dataset, there were three same-genus species with  
371 identical trait values and here two of them needed different shifts in order to obtain non-zero Gower  
372 dissimilarity values.

373

| <b>GER, 0.001% shift up</b> | <b>US 0.001% shift up</b>  | <b>US 0.002% shift up</b> |
|-----------------------------|----------------------------|---------------------------|
| Acinos arvensis             | Achillea sp                | Antennaria sp             |
| Arabidopsis thaliana        | Agrostis sp                | Tradescantia sp           |
| Chenopodium sp              | Allium stellatum           |                           |
| Clinopodium acinos          | Antennaria plantaginifolia |                           |
| Echinochloa crus-galli      | Calamagrostis sp           |                           |
| Epilobium sp                | Echinacea serotina         |                           |
| Listera ovata               | Euphorbia geyeri           |                           |
| Mentha aquatica             | Galium sp                  |                           |
| Sesleria albicans           | Gnaphalium sp              |                           |
| Orobanche caryophyllacea    | Melilotus sp               |                           |
| Rubus sp                    | Parthenocissus inserta     |                           |
| Rumex thyrsoiflorus         | Polygala sp                |                           |
| Poa angustifolia            | Polygonatum sp             |                           |
| Potentilla neumanniana      | Rhus sp                    |                           |
| Veronica spicata            | Rumex sp                   |                           |
|                             | Salix humilis              |                           |
|                             | Solidago altissima         |                           |
|                             | Stachys sp                 |                           |
|                             | Taraxacum sp               |                           |
|                             | Tradescantia bracteata     |                           |

374

59

375 **Table S17.** Correlation coefficients for 21 plant community properties for the German dataset.  
 376 Pearson correlation coefficients and color code (see legend) for all 21 properties (upper diagram) and  
 377 the subset of 12 community properties retained after stepwise removal due to variance inflation factors  
 378 above 3 (lower diagram). Diagrams were created using the “corrplot” package<sup>26</sup> in R.

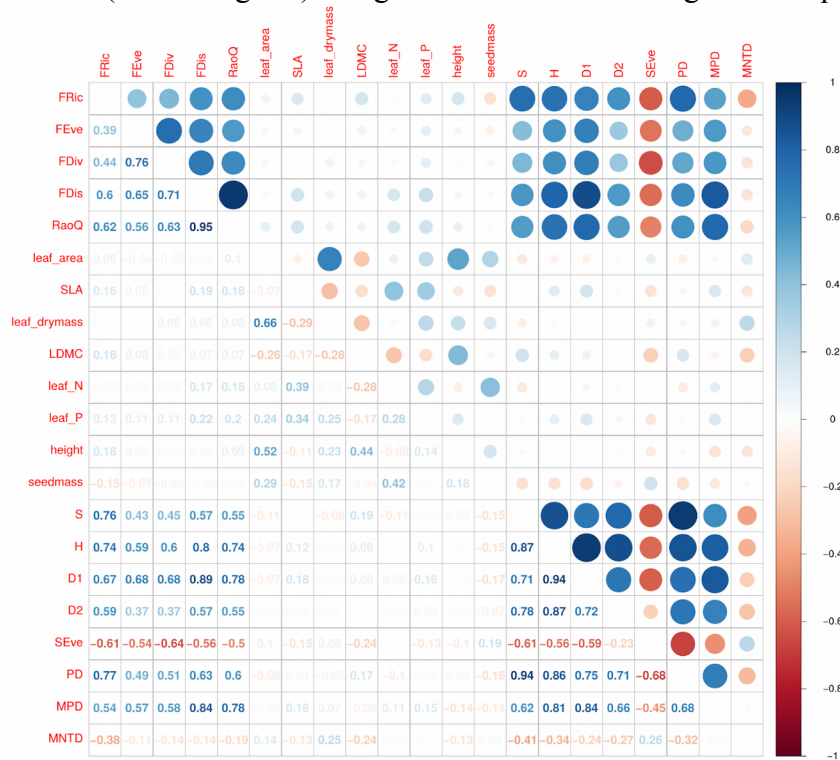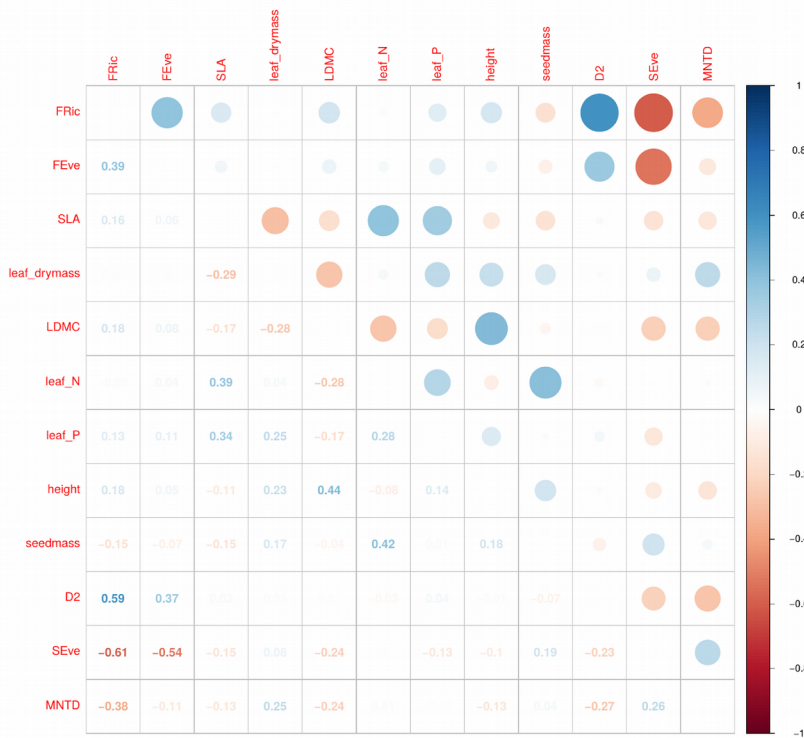

379  
 380  
 381

60

382 **Table S18.** Correlation coefficients for 21 plant community properties for the US dataset.  
 383 Pearson correlation coefficients and color code (see legend) for all 21 properties (upper diagram) and  
 384 the subset of 12 community properties retained after stepwise removal due to variance inflation factors  
 385 above 3 (lower diagram). Diagrams were created using the “corrplot” package<sup>26</sup> in R.

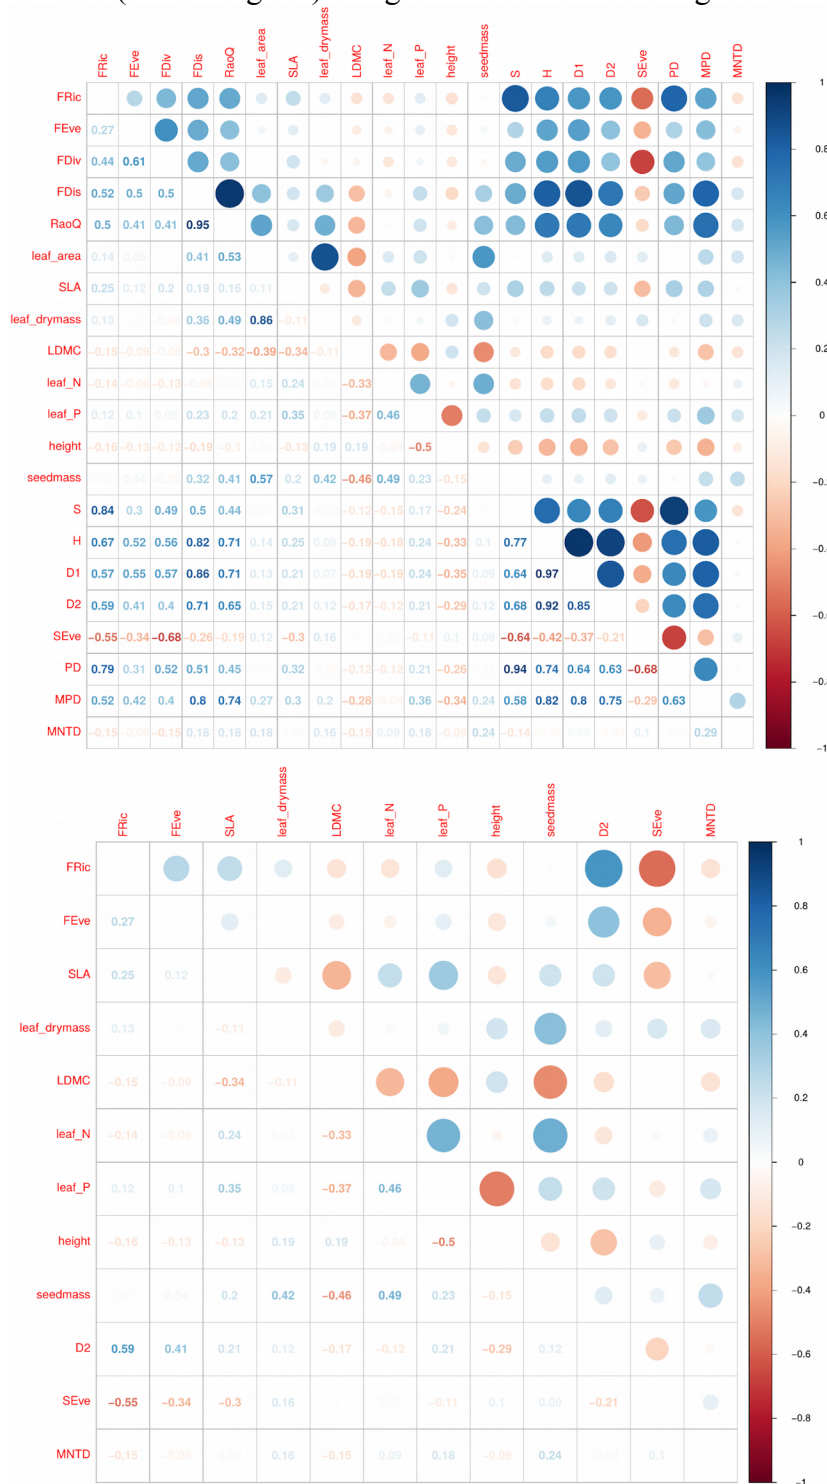

386

387

61

## 388 **Supporting Information References**

389

- 390 1. Fornara, D. A. & Tilman, D. Plant functional composition influences rates of soil carbon and  
391 nitrogen accumulation. *J. Ecol.* **96**, 314–322 (2008).
- 392 2. Lange, M. *et al.* Plant diversity increases soil microbial activity and soil carbon storage. *Nat.*  
393 *Commun.* **6**, 6707 (2015).
- 394 3. Ravenek, J. M. *et al.* Long-term study of root biomass in a biodiversity experiment reveals shifts  
395 in diversity effects over time. *Oikos* **123**, 1528–1536 (2014).
- 396 4. Meyer, S. T. *et al.* Consistent increase in herbivory along two experimental plant diversity  
397 gradients over multiple years. *Ecosphere* **8**, e01876 (2017).
- 398 5. Scheu, S. Automated measurement of the respiratory response of soil microcompartments:  
399 Active microbial biomass in earthworm faeces. *Soil Biol. Biochem.* **24**, 1113–1118 (1992).
- 400 6. Eisenhauer, N. *et al.* Plant diversity effects on soil microorganisms support the singular  
401 hypothesis. *Ecology* **91**, 485–496 (2010).
- 402 7. Strecker, T., Mace, O. G., Scheu, S. & Eisenhauer, N. Functional composition of plant  
403 communities determines the spatial and temporal stability of soil microbial properties in a long-  
404 term plant diversity experiment. *Oikos* **125**, 1743–1754 (2016).
- 405 8. Beck, T. *et al.* An inter-laboratory comparison of ten different ways of measuring soil microbial  
406 biomass C. *Soil Biol. Biochem.* **29**, 1023–1032 (1997).
- 407 9. Hacker, N. *et al.* Plant diversity shapes microbe-rhizosphere effects on P mobilisation from  
408 organic matter in soil. *Ecol. Lett.* **18**, 1356–1365 (2015).
- 409 10. Eivazi, F. & Tabatabai, M. A. Phosphatases in soils. *Soil Biol. Biochem.* **9**, 167–172 (1977).
- 410 11. Catford, J. A. *et al.* Traits linked with species invasiveness and community invasibility vary with  
411 time, stage and indicator of invasion in a long-term grassland experiment. *Ecol. Lett.* **22**, 593–  
412 604 (2019).
- 413 12. Inouye, R. *et al.* Old-field succession on a Minnesota sand plain. *Ecology* **68**, 12–26 (1987).
- 414 13. Tilman, D. Community Invasibility, Recruitment Limitation, and Grassland Biodiversity.  
415 *Ecology* **78**, 81–92 (1997).
- 416 14. Roscher, C., Schumacher, J. & Baade, J. The role of biodiversity for element cycling and trophic  
417 interactions: an experimental approach in a grassland community. *Basic Appl. Ecol.* **121**, 107–  
418 121 (2004).
- 419 15. Fischer, M. *et al.* Implementing large-scale and long-term functional biodiversity research: The  
420 Biodiversity Exploratories. *Basic Appl. Ecol.* **11**, 473–485 (2010).
- 421 16. Roscher, C. *et al.* Convergent high diversity in naturally colonized experimental grasslands is not

- 62  
422 related to increased productivity. *Perspect. Plant Ecol. Evol. Syst.* **20**, 32–45 (2016).
- 423 17. Weisser, W. W. *et al.* Biodiversity effects on ecosystem functioning in a 15-year grassland  
424 experiment: patterns, mechanisms, and open questions. *Basic Appl. Ecol.* **23**, 1–73 (2017).
- 425 18. Tilman, D. *et al.* The influence of functional diversity and composition on ecosystem processes.  
426 *Science (80-. )*. **277**, 1300–1302 (1997).
- 427 19. Tilman, D. Secondary succession and the pattern of plant dominance along experimental  
428 nitrogen gradients. *Ecol. Monogr.* **57**, 189–214 (1987).
- 429 20. Adler, D. & Kelly, T. vioplot: violin plot. R. *R Packag. version 0.3.0* (2018).
- 430 21. Chen, H. VennDiagram: Generate High-Resolution Venn and Euler Plots. *R Packag. version*  
431 *1.6.20* (2018).
- 432 22. Oksanen, J. *et al.* Vegan: community ecology package. *R Packag. version 2.3-4* (2016).
- 433 23. Bocci, G. TR8: An R package for easily retrieving plant species traits. *Methods Ecol. Evol.* **6**,  
434 347–350 (2015).
- 435 24. Fitter, A. & Peat, H. The Ecological Flora Database. *J. Ecol.* **82**, 415–425 (1994).
- 436 25. Kattge, J. *et al.* TRY - a global database of plant traits. *Glob. Chang. Biol.* **17**, 2905–2935  
437 (2011).
- 438 26. Wei, T. & Simko, V. R package ‘corrplot’: Visualization of a Correlation Matrix. *R Packag.*  
439 *version 0.84* (2017).  
440
